# Supplementary material for: Visualizing formation of the active site in the mitochondrial ribosome
Source: eLife. 2021 Oct 5;10:e68806. doi: 10.7554/eLife.68806 (PMC8492066; doi:10.7554/eLife.68806)
Supplement: Supplementary file 1. [file elife-68806-supp1.xlsx]

## Sheet: Sheet1
Gene		EAM19_1	EAM19_2	EAM19_3	EAM19_4	N2_1	N2_2	N2_3	N2_4		baseMeanEAM19	log2FoldChangeEAM19	lfcSEEAM19	statEAM19	pvalueEAM19	padjEAM19
WBGene00008010		5055.65	5821.76	4753.73	5735.34	17.9468	8.59198	6.97418	47.3012		2680.91	8.05181	0.580063	13.8809	8.26684e-44	7.88759e-41
WBGene00235090		253.602	255.504	263.783	227.734	1.88914	0.954664	0	1.05114		125.565	7.98938	0.738746	10.8148	2.9301e-27	9.51723e-25
WBGene00015573		572.775	827.542	661.805	884.701	2.83371	2.86399	0	9.46023		370.248	7.63537	0.41973	18.1912	6.06453e-74	1.85162e-70
WBGene00015572		100.284	139.648	121.096	193.102	1.88914	0.954664	0	0		69.6217	7.55196	0.873146	8.64914	5.18882e-18	7.69053e-16
WBGene00012798		22.1781	31.0328	31.9168	32.5335	0	0	0	0		14.7077	7.34097	1.08661	6.75584	1.42011e-11	7.99976e-10
WBGene00021107		8.6784	2.06886	93.8731	7.34627	0	0	0	0		13.9958	7.2711	1.97988	3.67249	0.000240196	0.00172475
WBGene00022674		150.426	190.335	154.891	195.201	0.944571	0.954664	0	3.15341		86.9881	7.12967	0.673872	10.5802	3.68342e-26	1.12462e-23
WBGene00008862		3994.96	4955.94	3951.12	4305.96	23.6143	18.1386	25.9041	56.7614		2166.55	7.12365	0.243111	29.3021	9.75391e-189	1.48903e-184
WBGene00013954		89.6768	109.649	95.7505	92.3531	0	0.954664	0.996312	2.10227		48.9354	6.6177	0.753371	8.78411	1.57604e-18	2.4804e-16
WBGene00008698		232.388	206.886	184.93	207.794	3.77828	1.90933	0	3.15341		105.105	6.55256	0.511762	12.8039	1.5589e-37	9.51928e-35
WBGene00013953		49.1776	63.1001	46.9365	56.6712	0	0	0.996312	2.10227		27.373	6.18624	0.878743	7.03987	1.92417e-12	1.28835e-10
WBGene00022215		75.2128	68.2722	81.6696	54.5723	0.944571	0	1.99262	1.05114		35.4644	6.1505	0.767588	8.01276	1.12162e-15	1.26834e-13
WBGene00009572		315.315	405.496	365.166	356.819	7.55657	3.81866	3.98525	5.25568		182.927	6.12444	0.350977	17.4497	3.46045e-68	8.80453e-65
WBGene00019880		0.964267	0	0.938731	78.71	0	0	0.996312	0		10.2012	6.07427	2.68928	2.2587	NA	NA
WBGene00018019		11.5712	13.4476	7.50984	11.5441	0	0	0	0		5.50909	5.92278	1.18077	5.01601	5.27556e-07	9.56493e-06
WBGene00018461		109.926	0	1.87746	0	1.88914	0	0	0		14.2116	5.84569	3.38433	1.72728	NA	NA
WBGene00008863		521.669	567.901	635.521	582.454	9.44571	9.54664	15.941	8.4091		293.861	5.73463	0.257775	22.2467	1.21529e-109	6.18422e-106
WBGene00044357		0.964267	78.6165	0	4.19787	0.944571	0	0	1.05114		10.7218	5.41076	2.22521	2.43158	NA	NA
WBGene00013832		161.033	174.818	155.829	157.42	3.77828	2.86399	4.98156	4.20455		83.1161	5.36334	0.40035	13.3966	6.32771e-41	4.82994e-38
WBGene00044249		49.1776	51.7214	48.814	49.325	2.83371	0.954664	0.996312	0		25.4778	5.33965	0.70289	7.5967	3.03777e-14	2.82113e-12
WBGene00022431		44.3563	45.5148	40.3654	45.1271	0.944571	0.954664	0.996312	2.10227		22.5452	5.1519	0.70637	7.29349	3.02033e-13	2.37672e-11
WBGene00021106		4.82134	13.4476	4.69365	2.09893	0	0	0	0		3.13269	5.10874	1.37005	3.72888	0.000192335	NA
WBGene00045068		5.7856	5.17214	9.38731	4.19787	0	0	0	0		3.06786	5.08485	1.29969	3.91236	9.13986e-05	NA
WBGene00022214		30.8565	18.6197	26.2845	23.0883	0	1.90933	0.996312	0		12.7193	5.06822	0.925013	5.47907	4.27557e-08	1.06478e-06
WBGene00014977		141.747	159.302	130.484	150.074	7.55657	7.63731	1.99262	2.10227		75.1119	4.88744	0.378313	12.919	3.51477e-38	2.23568e-35
WBGene00022432		14.464	15.5164	12.2035	14.6925	0.944571	0	0.996312	0		7.35217	4.84991	1.12164	4.32395	1.53259e-05	0.000170156
WBGene00009248		4.82134	5.17214	7.50984	13.6431	0	0	0	1.05114		4.02469	4.69961	1.25133	3.75569	0.000172868	0.00131064
WBGene00018648		74.2486	121.028	86.3632	94.452	5.66743	1.90933	0	7.35796		48.8783	4.66596	0.461392	10.1128	4.84887e-24	1.27626e-21
WBGene00008809		16.3925	8.27542	17.8359	4.19787	0	0.954664	0	1.05114		6.08844	4.57196	1.19855	3.81458	0.000136414	0.00106905
WBGene00019788		0	15.5164	0.938731	0	0	0	0	0		2.05689	4.50264	3.40197	1.32354	0.185656	NA
WBGene00012294		7.71414	2.06886	1.87746	4.19787	0	0	0	0		1.98229	4.45161	1.47515	3.01772	0.00254681	NA
WBGene00013427		2.8928	6.20657	5.63238	1.04947	0	0	0	0		1.97265	4.4459	1.4843	2.99528	0.00274192	NA
WBGene00016698		121.498	126.2	87.3019	103.897	9.44571	2.86399	3.98525	4.20455		57.4246	4.40924	0.391543	11.2612	2.03965e-29	8.19402e-27
WBGene00016551		87.7483	85.8575	63.8337	101.798	1.88914	4.77332	4.98156	5.25568		44.5172	4.33655	0.428193	10.1276	4.16928e-24	1.13658e-21
WBGene00022433		8.6784	7.24099	2.81619	5.24734	0	0.954664	0	0		3.1172	4.32437	1.2934	3.34341	0.000827556	NA
WBGene00009520		6.74987	11.3787	4.69365	16.7915	0	0	1.99262	0		5.20079	4.31795	1.22288	3.53097	0.000414031	0.00268962
WBGene00007077		14.464	12.4131	16.8972	13.6431	0	0	0.996312	2.10227		7.56449	4.27316	0.965415	4.42624	9.58915e-06	0.000114904
WBGene00000133		64.6059	92.0641	61.0175	65.067	2.83371	1.90933	1.99262	8.4091		37.2374	4.25014	0.465697	9.12639	7.08187e-20	1.28705e-17
WBGene00044256		339.422	418.943	391.451	463.864	17.0023	18.1386	20.9226	33.6364		212.923	4.17933	0.228938	18.2553	1.87672e-74	7.16249e-71
WBGene00001785		2.8928	3.10328	3.75492	3.1484	0	0	0	0		1.61243	4.15337	1.47498	2.81588	0.00486446	NA
WBGene00015270		21.2139	0	0	0	0	0	0.996312	0		2.77627	4.14973	3.39778	1.22131	0.22197	NA
WBGene00009038		0.964267	4.13771	0	7.34627	0	0	0	0		1.55603	4.09279	1.80431	2.26834	0.0233084	NA
WBGene00012571		0	4.13771	1.87746	6.2968	0	0	0	0		1.539	4.07838	1.74635	2.33537	0.0195239	NA
WBGene00008306		35.6779	47.5837	41.3041	57.7207	4.72285	2.86399	0.996312	2.10227		24.1215	4.07401	0.534315	7.62473	2.44546e-14	2.29114e-12
WBGene00077546		1.92853	0	4.69365	5.24734	0	0	0	0		1.48369	4.03367	1.74448	2.31226	0.0207636	NA
WBGene00077659		0.964267	3.10328	2.81619	4.19787	0	0	0	0		1.3852	3.9292	1.58617	2.47716	0.0132432	NA
WBGene00015838		2.8928	1.03443	2.81619	4.19787	0	0	0	0		1.36766	3.91496	1.58643	2.46777	0.0135957	NA
WBGene00015521		1.92853	4.13771	6.57111	5.24734	0	0	0.996312	0		2.36013	3.90289	1.36075	2.86818	0.0041284	NA
WBGene00004054		240.103	304.122	265.661	304.345	10.3903	15.2746	31.882	19.9716		148.969	3.85229	0.259378	14.8521	6.74726e-50	1.14448e-46
WBGene00009247		157.176	193.438	164.278	210.943	9.44571	7.63731	21.9189	11.5625		97.0498	3.84875	0.292069	13.1775	1.18216e-39	8.20314e-37
WBGene00016639		145.604	159.302	153.013	162.667	11.3349	11.456	9.96312	10.5114		82.9815	3.83998	0.274738	13.9769	2.15747e-44	2.35257e-41
WBGene00012620		13.4997	16.5508	11.2648	14.6925	0	0.954664	1.99262	1.05114		7.50079	3.82377	0.869244	4.39896	1.08768e-05	0.000127477
WBGene00013467		0.964267	5.17214	0.938731	3.1484	0	0	0	0		1.27794	3.8091	1.6793	2.26827	0.0233129	NA
WBGene00017214		44.3563	45.5148	75.0984	28.3356	1.88914	0	5.97787	6.30682		25.9349	3.79804	0.558472	6.80076	1.04066e-11	6.11025e-10
WBGene00195022		15.4283	0	0	1.04947	0	0	0.996312	0		2.18426	3.78799	1.91234	1.98081	0.0476121	NA
WBGene00013831		3.85707	3.10328	0.938731	2.09893	0	0	0	0		1.24975	3.78336	1.63206	2.31816	0.0204408	NA
WBGene00020118		0.964267	1.03443	4.69365	3.1484	0	0	0	0		1.23009	3.76518	1.68212	2.23836	0.0251976	NA
WBGene00012618		20.2496	13.4476	28.1619	15.742	0	3.81866	0.996312	1.05114		10.4334	3.72098	0.758681	4.90453	9.36493e-07	1.57131e-05
WBGene00219319		21.2139	31.0328	15.0197	23.0883	0	2.86399	0.996312	3.15341		12.171	3.70389	0.695702	5.32396	1.01534e-07	2.30314e-06
WBGene00022224		67.4987	72.4099	60.0788	55.6218	6.612	2.86399	6.97418	3.15341		34.4016	3.69919	0.410149	9.01913	1.89588e-19	3.21583e-17
WBGene00000658		39.535	37.2394	31.9168	45.1271	1.88914	0.954664	5.97787	3.15341		20.7242	3.69662	0.52675	7.01778	2.25427e-12	1.48984e-10
WBGene00012454		0.964267	6.20657	0.938731	7.34627	0	0.954664	0	0		2.05131	3.68215	1.50949	2.43934	0.0147143	NA
WBGene00077670		0.964267	6.20657	1.87746	6.2968	0.944571	0	0	0		2.03621	3.67285	1.46458	2.50779	0.0121487	NA
WBGene00171633		1.92853	8.27542	2.81619	2.09893	0.944571	0	0	0		2.00796	3.65589	1.44539	2.52934	0.0114276	NA
WBGene00009075		4.82134	5.17214	3.75492	1.04947	0	0	0.996312	0		1.97427	3.63225	1.4282	2.54323	0.0109833	NA
WBGene00019575		0.964267	4.13771	2.81619	1.04947	0	0	0	0		1.12095	3.62747	1.71023	2.12104	0.0339181	NA
WBGene00044237		2.8928	2.06886	1.87746	2.09893	0	0	0	0		1.11726	3.62384	1.6385	2.21168	0.026989	NA
WBGene00021013		1.92853	2.06886	2.81619	2.09893	0	0	0	0		1.11406	3.62067	1.63871	2.20947	0.0271423	NA
WBGene00015077		3.85707	0	3.75492	1.04947	0	0	0	0		1.08268	3.58595	1.91122	1.87627	0.0606188	NA
WBGene00015832		2.8928	0	4.69365	1.04947	0	0	0	0		1.07949	3.58229	1.91951	1.86625	0.0620057	NA
WBGene00011668		267.102	183.094	281.619	74.5122	10.3903	14.32	24.9078	18.9205		109.358	3.56139	0.393372	9.05349	1.38466e-19	2.42967e-17
WBGene00021700		24.1067	22.7574	15.0197	40.9292	2.83371	1.90933	0	4.20455		13.9701	3.52882	0.657784	5.36471	8.10785e-08	1.88416e-06
WBGene00012357		4.82134	0	6.57111	2.09893	0	0	0	1.05114		1.81782	3.50437	1.59663	2.19486	0.0281737	NA
WBGene00014182		5.7856	4.13771	5.63238	6.2968	1.88914	0	0	0		2.96771	3.47747	1.28251	2.71145	0.00669896	NA
WBGene00050900		0.964267	3.10328	1.87746	2.09893	0	0	0	0		1.00549	3.46749	1.7195	2.01657	0.0437405	NA
WBGene00022209		3.85707	5.17214	0	4.19787	0.944571	0	0	0		1.77146	3.46116	1.58088	2.18939	0.0285688	NA
WBGene00017465		0.964267	1.03443	2.81619	3.1484	0	0	0	0		0.995411	3.45629	1.75081	1.97411	0.0483697	NA
WBGene00044892		0	2.06886	3.75492	2.09893	0	0	0	0		0.990339	3.45029	1.9252	1.79218	0.0731047	NA
WBGene00015894		137.89	275.158	150.197	133.282	9.44571	15.2746	21.9189	17.8693		95.1295	3.43702	0.329102	10.4436	1.56679e-25	4.51295e-23
WBGene00005223		12.5355	6.20657	11.2648	12.5936	0.944571	0.954664	0	2.10227		5.82524	3.43173	0.916126	3.74591	0.00017974	0.00135035
WBGene00014906		1.92853	5.17214	4.69365	1.04947	0	0.954664	0	0		1.72481	3.4273	1.48451	2.30871	0.0209599	NA
WBGene00009680		0.964267	0	4.69365	2.09893	0	0	0	0		0.969607	3.42487	1.98427	1.72601	0.084345	NA
WBGene00007074		6.74987	0	2.81619	3.1484	0	0	0.996312	0		1.71385	3.41507	1.60629	2.12606	0.0334985	NA
WBGene00021703		427.17	160.336	444.02	15.742	28.3371	38.1866	21.9189	10.5114		143.278	3.40284	0.906171	3.75518	0.000173216	0.00131229
WBGene00008850		247.817	166.543	193.379	96.551	24.5588	23.8666	7.9705	10.5114		96.3995	3.38821	0.364548	9.29427	1.48215e-20	2.82831e-18
WBGene00018851		88.7126	99.3051	80.7308	91.3036	13.224	8.59198	3.98525	8.4091		49.2828	3.38692	0.331726	10.21	1.78896e-24	4.96549e-22
WBGene00009061		43.392	45.5148	82.6083	39.8797	6.612	5.72798	4.98156	3.15341		28.9837	3.36083	0.453938	7.40372	1.32418e-13	1.12933e-11
WBGene00012683		475.384	395.151	487.201	237.18	38.7274	55.3705	33.8746	27.3296		218.777	3.35715	0.270093	12.4296	1.80507e-35	9.84151e-33
WBGene00015829		7.71414	7.24099	15.0197	10.4947	0	0	0.996312	3.15341		5.5774	3.34446	0.952153	3.51252	0.000443877	0.00284476
WBGene00009756		1.92853	4.13771	1.87746	4.19787	0	0.954664	0	0		1.63703	3.33721	1.46214	2.28241	0.022465	NA
WBGene00013827		0.964267	5.17214	2.81619	3.1484	0	0	0.996312	0		1.63716	3.33396	1.48975	2.23793	0.0252257	NA
WBGene00044388		5.7856	4.13771	6.57111	3.1484	0	0	1.99262	0		2.70443	3.31464	1.31699	2.51684	0.0118414	NA
WBGene00086560		8.6784	6.20657	17.8359	6.2968	0.944571	0.954664	0.996312	1.05114		5.37054	3.31423	0.947076	3.49944	0.000466238	0.00295581
WBGene00015837		3.85707	8.27542	6.57111	10.4947	0	0.954664	0	2.10227		4.0319	3.28898	1.0871	3.02545	0.00248262	0.0115407
WBGene00007376		202.496	234.815	219.663	276.01	18.8914	24.8213	20.9226	31.5341		128.644	3.28315	0.227207	14.4501	2.50453e-47	3.82342e-44
WBGene00007872		101.248	185.163	110.77	308.543	12.2794	27.6853	14.9447	17.8693		97.3129	3.27547	0.382667	8.55956	1.13297e-17	1.61645e-15
WBGene00015991		8.6784	10.3443	8.44858	10.4947	0.944571	1.90933	0.996312	0		5.22702	3.27307	0.9176	3.56699	0.000361099	0.0024146
WBGene00019070		64.6059	72.4099	62.8949	76.6111	6.612	6.68265	6.97418	8.4091		38.15	3.27248	0.351693	9.30495	1.34058e-20	2.62376e-18
WBGene00012617		0	2.06886	2.81619	2.09893	0	0	0	0		0.872998	3.26642	1.98352	1.64677	0.0996043	NA
WBGene00013786		0	2.06886	2.81619	2.09893	0	0	0	0		0.872998	3.26642	1.98352	1.64677	0.0996043	NA
WBGene00023493		67.4987	1.03443	5.63238	0	2.83371	2.86399	1.99262	0		10.232	3.26486	1.77511	1.83925	NA	NA
WBGene00013152		9.64267	10.3443	9.38731	8.39574	0	1.90933	1.99262	0		5.20899	3.26404	0.930261	3.50874	0.000450231	0.00287582
WBGene00018980		1.92853	1.03443	1.87746	2.09893	0	0	0	0		0.86742	3.25926	1.78057	1.83046	0.0671813	NA
WBGene00009362		1.92853	2.06886	1.87746	1.04947	0	0	0	0		0.86554	3.25695	1.78096	1.82876	0.0674349	NA
WBGene00015600		53.0347	40.3427	70.4048	22.0388	5.66743	7.63731	5.97787	0		25.6379	3.25397	0.534969	6.08254	1.18292e-09	4.36194e-08
WBGene00015696		3.85707	1.03443	0.938731	1.04947	0	0	0	0		0.859962	3.24962	1.85627	1.75062	0.0800118	NA
WBGene00007273		0	2.06886	3.75492	1.04947	0	0	0	0		0.859156	3.24748	2.03624	1.59485	0.110747	NA
WBGene00012011		10.6069	3.10328	10.326	3.1484	1.88914	0.954664	0	0		3.75356	3.22444	1.14823	2.80819	0.00498201	NA
WBGene00007075		0.964267	1.03443	4.69365	0	0	0	0	0		0.836543	3.21544	2.09689	1.53343	0.125169	NA
WBGene00007960		1.92853	3.10328	1.87746	4.19787	0	0	0	1.05114		1.51979	3.20933	1.4825	2.1648	0.0304028	NA
WBGene00008009		3.85707	4.13771	1.87746	1.04947	0	0.954664	0	0		1.48455	3.19186	1.51799	2.10269	0.0354932	NA
WBGene00014956		3.85707	5.17214	3.75492	5.24734	0	0.954664	0	1.05114		2.50466	3.18947	1.29301	2.4667	0.0136365	NA
WBGene00017629		0.964267	1.03443	4.69365	4.19787	0	0	0	1.05114		1.49267	3.18838	1.55704	2.04772	0.0405876	NA
WBGene00016064		60.7488	71.3755	62.8949	43.0282	6.612	8.59198	7.9705	3.15341		33.0469	3.16716	0.390776	8.10479	5.28373e-16	6.30168e-14
WBGene00015992		5.7856	5.17214	7.50984	7.34627	0	0.954664	0.996312	1.05114		3.602	3.12289	1.06777	2.92468	0.00344806	NA
WBGene00014769		9.64267	13.4476	9.38731	10.4947	0.944571	0	0.996312	3.15341		6.00831	3.11195	0.848551	3.66737	0.000245057	0.00175719
WBGene00008681		569.882	651.689	558.545	802.842	90.6788	65.8718	73.7271	69.375		360.326	3.10583	0.180128	17.2424	1.27726e-66	2.78553e-63
WBGene00005195		0.964267	3.10328	1.87746	4.19787	0	0.954664	0	0		1.38719	3.07685	1.54258	1.99462	0.0460848	NA
WBGene00023172		40.4992	59.9968	55.3851	44.0776	2.83371	2.86399	11.9557	6.30682		27.9899	3.07344	0.436391	7.04287	1.88317e-12	1.26645e-10
WBGene00005527		1.92853	1.03443	0	3.1484	0	0	0	0		0.76392	3.06858	2.09745	1.463	0.143466	NA
WBGene00005196		1.92853	3.10328	1.87746	3.1484	0	0	0.996312	0		1.38175	3.06758	1.5068	2.03583	0.0417679	NA
WBGene00017444		1.92853	4.13771	1.87746	2.09893	0	0.954664	0	0		1.37466	3.06617	1.51926	2.01821	0.0435699	NA
WBGene00235367		0.964267	2.06886	0.938731	2.09893	0	0	0	0		0.758848	3.05923	1.8757	1.63098	0.102895	NA
WBGene00018223		78.1056	85.8575	82.6083	73.4627	8.50114	6.68265	13.9484	9.46023		44.8283	3.05687	0.318874	9.58648	9.11419e-22	1.93246e-19
WBGene00019189		514.919	666.171	446.836	787.1	66.12	58.2345	70.7382	95.6535		338.222	3.05646	0.220538	13.8591	1.1211e-43	1.00674e-40
WBGene00219205		2.8928	0	0	3.1484	0	0	0	0		0.75515	3.05582	2.40998	1.26798	0.204803	NA
WBGene00020350		1.92853	1.03443	3.75492	3.1484	0	0	0	1.05114		1.36468	3.04754	1.54012	1.97876	0.0478427	NA
WBGene00009755		1.92853	1.03443	0.938731	2.09893	0	0	0	0		0.750078	3.04651	1.87838	1.62188	0.104829	NA
WBGene00196500		0.964267	0	1.87746	3.1484	0	0	0	0		0.748766	3.04478	2.10431	1.44693	0.147918	NA
WBGene00017552		1.92853	2.06886	0.938731	1.04947	0	0	0	0		0.748198	3.04383	1.87897	1.61994	0.105245	NA
WBGene00008984		0.964267	1.03443	1.87746	2.09893	0	0	0	0		0.746886	3.04175	1.87935	1.61851	0.105553	NA
WBGene00011134		2.8928	0	3.75492	3.1484	0	0	0	1.05114		1.35591	3.03894	1.65813	1.83275	0.0668398	NA
WBGene00009786		2.8928	1.03443	0.938731	1.04947	0	0	0	0		0.739428	3.03089	1.91274	1.58458	0.113061	NA
WBGene00044270		2.8928	1.03443	0.938731	1.04947	0	0	0	0		0.739428	3.03089	1.91274	1.58458	0.113061	NA
WBGene00012453		1.92853	0	1.87746	2.09893	0	0	0	0		0.738116	3.02815	2.07522	1.45919	0.144512	NA
WBGene00018122		1.92853	0	1.87746	2.09893	0	0	0	0		0.738116	3.02815	2.07522	1.45919	0.144512	NA
WBGene00018457		1.92853	2.06886	1.87746	0	0	0	0	0		0.734356	3.02233	2.07702	1.45513	0.145633	NA
WBGene00015988		203.46	230.677	205.582	197.3	17.0023	18.1386	30.8857	37.8409		117.611	3.02112	0.239689	12.6043	1.99896e-36	1.13023e-33
WBGene00235092		6.74987	3.10328	7.50984	6.2968	0.944571	1.90933	0	0		3.31421	3.01708	1.12283	2.68703	0.0072091	NA
WBGene00044541		65.5702	62.0657	52.5689	58.7702	7.55657	6.68265	7.9705	7.35796		33.5678	3.01505	0.355088	8.491	2.04868e-17	2.89584e-15
WBGene00001885		0	1.03443	3.75492	1.04947	0	0	0	0		0.729852	3.01447	2.16045	1.39529	0.162927	NA
WBGene00012838		0	1.03443	3.75492	1.04947	0	0	0	0		0.729852	3.01447	2.16045	1.39529	0.162927	NA
WBGene00005582		21.2139	17.5853	15.0197	9.4452	3.77828	0	1.99262	2.10227		8.89215	3.00776	0.711044	4.23005	2.33635e-05	0.000242631
WBGene00018882		1.92853	1.03443	2.81619	0	0	0	0	0		0.722394	3.00295	2.11771	1.41802	0.156186	NA
WBGene00045236		0.964267	1.03443	3.75492	0	0	0	0	0		0.719202	2.99723	2.16593	1.38381	0.166417	NA
WBGene00019933		23.1424	20.6886	25.3457	25.1872	2.83371	1.90933	2.98894	4.20455		13.2876	2.99433	0.549556	5.44863	5.07587e-08	1.2418e-06
WBGene00015165		4.82134	2.06886	6.57111	2.09893	0	0.954664	0	1.05114		2.19576	2.98853	1.36434	2.19046	0.0284913	NA
WBGene00022587		15.4283	19.6541	16.8972	24.1377	0	3.81866	4.98156	1.05114		10.7461	2.94746	0.647759	4.55024	5.3584e-06	6.9382e-05
WBGene00077685		0.964267	5.17214	0.938731	2.09893	0	0.954664	0	0		1.26609	2.93081	1.62201	1.8069	0.0707785	NA
WBGene00012227		1.92853	6.20657	4.69365	2.09893	0	0.954664	0	1.05114		2.11669	2.91954	1.3723	2.12748	0.0333804	NA
WBGene00198082		0.964267	1.03443	2.81619	4.19787	0	0.954664	0	0		1.24593	2.91123	1.60437	1.81456	0.069591	NA
WBGene00009602		12.5355	10.3443	13.1422	15.742	1.88914	0.954664	0	4.20455		7.35154	2.89951	0.751101	3.86035	0.000113226	0.000914552
WBGene00220084		17.3568	40.3427	32.8556	33.5829	5.66743	6.68265	2.98894	1.05114		17.566	2.89931	0.529121	5.47949	4.26564e-08	1.06404e-06
WBGene00011466		3.85707	2.06886	6.57111	2.09893	0	0	0.996312	1.05114		2.08043	2.88904	1.37677	2.09841	0.0358686	NA
WBGene00014992		20.2496	19.6541	14.081	18.8904	0.944571	3.81866	1.99262	3.15341		10.348	2.88361	0.61824	4.66422	3.09784e-06	4.32282e-05
WBGene00010474		0.964267	2.06886	4.69365	1.04947	0	0.954664	0	0		1.21636	2.88282	1.62363	1.77554	0.0758082	NA
WBGene00018850		169.711	169.646	152.074	156.371	18.8914	17.184	25.9041	26.2784		92.0075	2.88202	0.227509	12.6677	8.92887e-37	5.24262e-34
WBGene00005556		3.85707	2.06886	2.81619	0	0	0.954664	0	0		1.2121	2.87771	1.70814	1.6847	0.0920465	NA
WBGene00016730		1.92853	0	4.69365	2.09893	0	0	0	1.05114		1.22153	2.87462	1.72491	1.66653	0.0956086	NA
WBGene00015015		6.74987	10.3443	9.38731	9.4452	1.88914	0.954664	0.996312	1.05114		5.10224	2.86773	0.855652	3.35152	0.000803698	0.00459179
WBGene00007873		186.104	328.948	199.011	528.931	43.4503	55.3705	27.8967	46.25		176.995	2.84375	0.329762	8.62363	6.48618e-18	9.52096e-16
WBGene00013713		76.1771	104.477	89.1794	107.046	13.224	11.456	12.9521	15.7671		53.7848	2.82145	0.289286	9.75316	1.78821e-22	4.01454e-20
WBGene00014976		0	1.03443	0.938731	3.1484	0	0	0	0		0.640195	2.81195	2.23377	1.25884	0.208089	NA
WBGene00012091		0.964267	3.10328	0	1.04947	0	0	0	0		0.639627	2.81112	2.23418	1.25823	0.208307	NA
WBGene00006539		262.281	318.604	242.192	439.727	28.3371	47.7332	39.8525	65.1705		180.487	2.8053	0.264776	10.595	3.14472e-26	9.79741e-24
WBGene00013944		1.92853	0	0	3.1484	0	0	0	0		0.634617	2.80312	2.54067	1.1033	0.269898	NA
WBGene00005076		1.92853	2.06886	0	1.04947	0	0	0	0		0.630857	2.79473	2.20667	1.26649	0.205337	NA
WBGene00019966		0.964267	2.06886	0.938731	1.04947	0	0	0	0		0.627665	2.78797	1.99166	1.39983	0.161565	NA
WBGene00020681		0.964267	2.06886	0.938731	1.04947	0	0	0	0		0.627665	2.78797	1.99166	1.39983	0.161565	NA
WBGene00012749		0	1.03443	1.87746	2.09893	0	0	0	0		0.626353	2.78611	2.20962	1.2609	0.207345	NA
WBGene00138715		2.8928	1.03443	0	1.04947	0	0	0	0		0.622087	2.77845	2.24592	1.23711	0.216046	NA
WBGene00017873		3.85707	5.17214	2.81619	8.39574	0.944571	0.954664	0.996312	0		2.89209	2.77624	1.13939	2.4366	0.0148262	NA
WBGene00010014		1.92853	1.03443	0.938731	1.04947	0	0	0	0		0.618895	2.77273	1.9959	1.38921	0.16477	NA
WBGene00007920		8.6784	7.24099	4.69365	6.2968	1.88914	0	0.996312	1.05114		3.85581	2.77149	0.981295	2.82432	0.00473813	NA
WBGene00007660		82.927	99.3051	128.606	83.9574	17.0023	19.0933	8.96681	12.6136		56.5589	2.77005	0.305371	9.0711	1.17816e-19	2.09138e-17
WBGene00013337		1.92853	2.06886	0.938731	0	0	0	0	0		0.617015	2.76891	2.216	1.24951	0.211479	NA
WBGene00012727		0.964267	1.03443	1.87746	1.04947	0	0	0	0		0.615703	2.76701	1.99746	1.38526	0.165973	NA
WBGene00008067		0	0	2.81619	2.09893	0	0	0	0		0.614391	2.76278	2.56001	1.0792	0.280496	NA
WBGene00018020		0	0	2.81619	2.09893	0	0	0	0		0.614391	2.76278	2.56001	1.0792	0.280496	NA
WBGene00022223		58.8203	56.8935	55.3851	35.6819	10.3903	4.77332	5.97787	9.46023		29.6728	2.76028	0.387099	7.13067	9.98804e-13	7.36606e-11
WBGene00164974		2.8928	0	0.938731	1.04947	0	0	0	0		0.610125	2.75571	2.2543	1.22242	0.221547	NA
WBGene00015834		1.92853	0	1.87746	1.04947	0	0	0	0		0.606933	2.74973	2.22305	1.23692	0.216118	NA
WBGene00206492		1.92853	1.03443	1.87746	0	0	0	0	0		0.605053	2.74622	2.22441	1.23459	0.216985	NA
WBGene00197597		0.964267	0	2.81619	1.04947	0	0	0	0		0.603741	2.74328	2.25888	1.21444	0.224579	NA
WBGene00019886		0	3.10328	2.81619	2.09893	0	0.954664	0	0		1.12163	2.74264	1.7412	1.57515	0.115222	NA
WBGene00014246		0	4.13771	2.81619	1.04947	0	0	0.996312	0		1.12496	2.74072	1.7817	1.53826	0.123986	NA
WBGene00196903		1.92853	3.10328	1.87746	1.04947	0	0.954664	0	0		1.11418	2.73446	1.60821	1.70031	0.0890721	NA
WBGene00009420		0	0	3.75492	1.04947	0	0	0	0		0.600549	2.73442	2.61901	1.04407	0.296455	NA
WBGene00077582		3.85707	0	0.938731	0	0	0	0	0		0.599475	2.73252	2.62017	1.04288	0.297005	NA
WBGene00009114		1.92853	4.13771	1.87746	0	0	0	0.996312	0		1.1175	2.73241	1.75337	1.55837	0.119145	NA
WBGene00015891		3.85707	1.03443	0.938731	2.09893	0	0.954664	0	0		1.11048	2.7306	1.64532	1.65961	0.0969929	NA
WBGene00010679		2.8928	2.06886	1.87746	1.04947	0	0	0	1.05114		1.11747	2.72543	1.60544	1.69762	0.0895795	NA
WBGene00044208		0	1.03443	4.69365	7.34627	0	0.954664	0.996312	0		1.87817	2.72462	1.57513	1.72978	0.0836702	NA
WBGene00021179		1.92853	2.06886	2.81619	1.04947	0	0	0	1.05114		1.11427	2.72205	1.60558	1.69537	0.090006	NA
WBGene00003629		0.964267	4.13771	4.69365	3.1484	0	0.954664	0	1.05114		1.86873	2.71344	1.41044	1.92383	0.054376	NA
WBGene00014186		2.8928	4.13771	2.81619	3.1484	0	0	0.996312	1.05114		1.88032	2.71083	1.36786	1.9818	0.0475011	NA
WBGene00235093		25.0709	17.5853	59.14	17.8409	3.77828	3.81866	7.9705	3.15341		17.2948	2.6807	0.575379	4.65903	3.1771e-06	4.40124e-05
WBGene00008797		13.4997	7.24099	4.69365	12.5936	0.944571	0.954664	1.99262	2.10227		5.50277	2.67744	0.836322	3.20144	0.00136742	0.00709551
WBGene00015093		1.92853	0	5.63238	0	0	0	0.996312	0		1.06965	2.67266	2.02636	1.31895	0.187187	NA
WBGene00011132		4.82134	1.03443	8.44858	4.19787	0.944571	0	1.99262	0		2.67993	2.6563	1.23616	2.14884	0.0316472	NA
WBGene00021671		308.565	337.223	286.313	285.455	42.5057	39.1412	53.8009	60.9659		176.746	2.63696	0.183693	14.3552	9.87849e-47	1.37095e-43
WBGene00020285		19.2853	22.7574	23.4683	19.9399	1.88914	6.68265	0.996312	4.20455		12.4029	2.63254	0.559535	4.70487	2.54024e-06	3.66534e-05
WBGene00018809		0.964267	4.13771	1.87746	5.24734	0.944571	0	0	1.05114		1.77781	2.62428	1.44038	1.82193	0.0684659	NA
WBGene00019991		10.6069	14.482	15.9584	13.6431	0.944571	2.86399	2.98894	2.10227		7.94877	2.62359	0.667501	3.93046	8.47819e-05	0.000719844
WBGene00018663		2.8928	7.24099	2.81619	5.24734	0	1.90933	0.996312	0		2.63787	2.62316	1.19088	2.2027	0.0276157	NA
WBGene00015990		0	4.13771	3.75492	4.19787	0.944571	0	0.996312	0		1.75392	2.61341	1.5156	1.72433	0.0846476	NA
WBGene00010092		4.82134	4.13771	5.63238	3.1484	0	1.90933	0.996312	0		2.58068	2.59631	1.1723	2.21472	0.0267795	NA
WBGene00015982		2.8928	3.10328	3.75492	2.09893	0	0.954664	0	1.05114		1.73197	2.58993	1.39447	1.85728	0.0632715	NA
WBGene00013087		1.92853	4.13771	3.75492	2.09893	0	0	0	2.10227		1.7528	2.58674	1.4584	1.77368	0.0761156	NA
WBGene00007673		0	4.13771	0.938731	2.09893	0	0	0.996312	0		1.02146	2.57543	1.83096	1.4066	0.159546	NA
WBGene00012745		15.4283	14.482	15.0197	18.8904	3.77828	0.954664	4.98156	1.05114		9.32325	2.56005	0.628168	4.07542	4.59311e-05	0.000431232
WBGene00017553		8.6784	7.24099	13.1422	5.24734	1.88914	0	2.98894	1.05114		5.02977	2.54127	0.862139	2.94763	0.00320216	0.014112
WBGene00044000		1.92853	1.03443	1.87746	2.09893	0	0.954664	0	0		0.986753	2.53817	1.65146	1.53692	0.124312	NA
WBGene00015456		200.568	262.745	220.602	306.444	44.3948	29.5946	41.8451	55.7103		145.238	2.53226	0.226392	11.1853	4.81359e-29	1.83711e-26
WBGene00013449		0.964267	2.06886	2.81619	1.04947	0.944571	0	0	0		0.980419	2.53206	1.67819	1.5088	0.131349	NA
WBGene00044646		21.2139	10.3443	14.081	10.4947	4.72285	3.81866	0	1.05114		8.2158	2.52838	0.712083	3.55069	0.000384229	0.00253594
WBGene00008125		2.8928	1.03443	1.87746	1.04947	0.944571	0	0	0		0.974841	2.52557	1.67878	1.5044	0.132477	NA
WBGene00015997		2.8928	1.03443	1.87746	1.04947	0.944571	0	0	0		0.974841	2.52557	1.67878	1.5044	0.132477	NA
WBGene00001388		0.964267	4.13771	4.69365	7.34627	0	0.954664	0	2.10227		2.52485	2.51445	1.24616	2.01776	0.0436168	NA
WBGene00014921		0	2.06886	0	2.09893	0	0	0	0		0.520974	2.51284	2.69938	0.930894	0.351908	NA
WBGene00021592		2.8928	0	2.81619	1.04947	0	0	0.996312	0		0.969347	2.50879	1.82631	1.3737	0.169536	NA
WBGene00022563		2.8928	1.03443	2.81619	0	0.944571	0	0	0		0.960999	2.50637	1.82942	1.37004	0.170676	NA
WBGene00017271		7.71414	6.20657	5.63238	8.39574	1.88914	0	1.99262	1.05114		4.11022	2.50237	0.909927	2.75008	0.00595804	0.022957
WBGene00016519		1.92853	1.03443	3.75492	0	0	0	0	1.05114		0.971128	2.50202	1.83704	1.36199	0.173202	NA
WBGene00018121		1.92853	1.03443	3.75492	0	0	0	0.996312	0		0.964275	2.50197	1.83997	1.35979	0.173897	NA
WBGene00005104		5.7856	0	0.938731	0	0.944571	0	0	0		0.958613	2.49981	2.12176	1.17817	0.238728	NA
WBGene00007902		0.964267	0	0	3.1484	0	0	0	0		0.514084	2.4965	2.74083	0.910855	0.362372	NA
WBGene00201620		3.85707	0	2.81619	0	0.944571	0	0	0		0.952229	2.49144	2.05038	1.21511	0.224324	NA
WBGene00020526		6.74987	7.24099	12.2035	12.5936	1.88914	1.90933	0	3.15341		5.71748	2.48841	0.796296	3.12498	0.00177819	0.00878789
WBGene00018498		0.964267	2.06886	0	1.04947	0	0	0	0		0.510324	2.48551	2.3715	1.04808	0.294603	NA
WBGene00010451		43.392	48.6181	44.1203	62.968	7.55657	8.59198	9.96312	9.46023		29.3338	2.4855	0.356827	6.96556	3.27103e-12	2.11591e-10
WBGene00005039		0.964267	3.10328	0	0	0	0	0	0		0.508444	2.48301	2.74853	0.903393	0.366317	NA
WBGene00021181		0	1.03443	0.938731	2.09893	0	0	0	0		0.509012	2.48231	2.37278	1.04616	0.295486	NA
WBGene00011712		19.2853	19.6541	15.0197	11.5441	4.72285	2.86399	2.98894	1.05114		9.64128	2.47873	0.608273	4.07504	4.60069e-05	0.000431413
WBGene00044943		0	2.06886	0.938731	1.04947	0	0	0	0		0.507132	2.4781	2.37467	1.04355	0.296692	NA
WBGene00012720		18.3211	10.3443	16.8972	9.4452	0	2.86399	2.98894	4.20455		8.13315	2.47518	0.6894	3.59033	0.000330255	0.00225203
WBGene00194847		0	3.10328	0.938731	0	0	0	0	0		0.505252	2.47512	2.75294	0.899082	0.368609	NA
WBGene00044644		169.711	105.512	124.851	152.173	18.8914	18.1386	18.9299	44.1478		81.5443	2.47302	0.302975	8.16246	3.28268e-16	4.04141e-14
WBGene00045131		1.92853	0	0	2.09893	0	0	0	0		0.503434	2.4706	2.72317	0.90725	0.364275	NA
WBGene00044427		1.92853	1.03443	0	1.04947	0	0	0	0		0.501554	2.46546	2.38036	1.03575	0.300319	NA
WBGene00077646		1.92853	1.03443	0	1.04947	0	0	0	0		0.501554	2.46546	2.38036	1.03575	0.300319	NA
WBGene00013503		0.964267	0	0.938731	2.09893	0	0	0	0		0.500241	2.46222	2.38169	1.03381	0.301223	NA
WBGene00044979		0.964267	0	0.938731	2.09893	0	0	0	0		0.500241	2.46222	2.38169	1.03381	0.301223	NA
WBGene00077634		1.92853	2.06886	0	0	0	0	0	0		0.499674	2.46151	2.72848	0.902155	0.366975	NA
WBGene00219787		1.92853	2.06886	0	0	0	0	0	0		0.499674	2.46151	2.72848	0.902155	0.366975	NA
WBGene00018652		0	0	1.87746	2.09893	0	0	0	0		0.497049	2.45471	2.73276	0.898255	0.369049	NA
WBGene00195058		0	0	1.87746	2.09893	0	0	0	0		0.497049	2.45471	2.73276	0.898255	0.369049	NA
WBGene00006164		0.964267	2.06886	0.938731	0	0	0	0	0		0.496482	2.45369	2.38562	1.02853	0.303699	NA
WBGene00023340		0.964267	2.06886	0.938731	0	0	0	0	0		0.496482	2.45369	2.38562	1.02853	0.303699	NA
WBGene00195754		0.964267	2.06886	0.938731	0	0	0	0	0		0.496482	2.45369	2.38562	1.02853	0.303699	NA
WBGene00014922		0	1.03443	1.87746	1.04947	0	0	0	0		0.49517	2.45043	2.38697	1.02659	0.304616	NA
WBGene00019059		0	1.03443	1.87746	1.04947	0	0	0	0		0.49517	2.45043	2.38697	1.02659	0.304616	NA
WBGene00021833		0	1.03443	1.87746	1.04947	0	0	0	0		0.49517	2.45043	2.38697	1.02659	0.304616	NA
WBGene00206536		8.6784	14.482	16.8972	8.39574	0.944571	1.90933	3.98525	2.10227		7.17434	2.44847	0.70891	3.45386	0.000552634	0.0033819
WBGene00018449		0	2.06886	1.87746	0	0	0	0	0		0.49329	2.44554	2.73817	0.89313	0.371788	NA
WBGene00023225		0	2.06886	1.87746	0	0	0	0	0		0.49329	2.44554	2.73817	0.89313	0.371788	NA
WBGene00199819		2.8928	0	0	1.04947	0	0	0	0		0.492784	2.4444	2.77067	0.882241	0.377646	NA
WBGene00015907		3.85707	6.20657	10.326	6.2968	1.88914	0.954664	0.996312	1.05114		3.94722	2.44359	0.921619	2.65141	0.00801559	0.0290616
WBGene00007661		2.8928	1.03443	0	0	0	0	0	0		0.490904	2.43977	2.77342	0.879696	0.379024	NA
WBGene00219658		2.8928	1.03443	0	0	0	0	0	0		0.490904	2.43977	2.77342	0.879696	0.379024	NA
WBGene00043469		1.92853	4.13771	5.63238	4.19787	0.944571	0.954664	0.996312	0		2.34901	2.43611	1.18118	2.06244	0.039166	NA
WBGene00016826		1.92853	1.03443	0.938731	0	0	0	0	0		0.487712	2.43326	2.39496	1.01599	0.309634	NA
WBGene00235280		1.92853	1.03443	0.938731	0	0	0	0	0		0.487712	2.43326	2.39496	1.01599	0.309634	NA
WBGene00009753		5.7856	4.13771	2.81619	3.1484	1.88914	0	0	1.05114		2.35352	2.43002	1.20572	2.0154	0.0438625	NA
WBGene00012223		0.964267	0	1.87746	1.04947	0	0	0	0		0.486399	2.42996	2.39636	1.01402	0.310573	NA
WBGene00011386		0.964267	1.03443	1.87746	0	0	0	0	0		0.48452	2.42561	2.39842	1.01134	0.311856	NA
WBGene00012773		0.964267	1.03443	1.87746	0	0	0	0	0		0.48452	2.42561	2.39842	1.01134	0.311856	NA
WBGene00077656		0	0	2.81619	1.04947	0	0	0	0		0.483207	2.42002	2.78479	0.869011	0.384841	NA
WBGene00010962		43524.1	48837.4	49098.4	43354.5	8261.22	8427.77	8386.96	9464.44		27419.4	2.41976	0.0972317	24.8866	1.04017e-136	7.93963e-133
WBGene00018711		4.82134	6.20657	4.69365	5.24734	0.944571	1.90933	0.996312	0		3.10239	2.41941	1.02044	2.37094	0.0177427	NA
WBGene00198638		3.85707	0	0	0	0	0	0	0		0.482134	2.41563	3.30375	0.731178	0.46467	NA
WBGene00173839		0	1.03443	2.81619	0	0	0	0	0		0.481327	2.41531	2.78764	0.866437	0.386251	NA
WBGene00008699		2.8928	0	0.938731	0	0	0	0	0		0.478942	2.40948	2.7913	0.863211	0.388022	NA
WBGene00010108		2.8928	0	0.938731	0	0	0	0	0		0.478942	2.40948	2.7913	0.863211	0.388022	NA
WBGene00015893		2.8928	0	0.938731	0	0	0	0	0		0.478942	2.40948	2.7913	0.863211	0.388022	NA
WBGene00023266		1.92853	0	1.87746	0	0	0	0	0		0.475749	2.40145	2.76433	0.868727	0.384996	NA
WBGene00195227		1.92853	0	1.87746	0	0	0	0	0		0.475749	2.40145	2.76433	0.868727	0.384996	NA
WBGene00005349		0.964267	0	2.81619	0	0	0	0	0		0.472557	2.3929	2.80114	0.854259	0.392961	NA
WBGene00007865		0.964267	0	2.81619	0	0	0	0	0		0.472557	2.3929	2.80114	0.854259	0.392961	NA
WBGene00196728		0	0	3.75492	0	0	0	0	0		0.469365	2.38079	3.33056	0.714832	0.474713	NA
WBGene00004976		273.852	362.05	266.599	302.247	43.4503	51.5519	72.7308	64.1194		179.575	2.38003	0.199185	11.9488	6.58385e-33	3.3503e-30
WBGene00077629		22.1781	11.3787	16.8972	10.4947	1.88914	3.81866	4.98156	1.05114		9.08615	2.37404	0.639064	3.71487	0.00020331	0.00149505
WBGene00010656		1.92853	2.06886	0	6.2968	0	0.954664	0	1.05114		1.5375	2.37158	1.60105	1.48127	0.138536	NA
WBGene00021390		2.8928	2.06886	0.938731	4.19787	1.88914	0	0	0		1.49842	2.36145	1.53986	1.53354	0.125142	NA
WBGene00044084		0.964267	5.17214	1.87746	2.09893	0.944571	0	0	1.05114		1.51356	2.35316	1.48812	1.58129	0.113811	NA
WBGene00018310		116.676	124.131	124.851	105.996	17.9468	29.5946	26.9004	17.8693		70.4958	2.35111	0.243511	9.65507	4.67834e-22	1.02028e-19
WBGene00003663		0	3.10328	0.938731	2.09893	0	0.954664	0	0		0.886951	2.3506	1.87869	1.25119	0.210866	NA
WBGene00015668		6.74987	6.20657	1.87746	5.24734	0	2.86399	0	1.05114		2.99955	2.34974	1.11608	2.10535	0.035261	NA
WBGene00005550		6.74987	7.24099	8.44858	2.09893	3.77828	0	0.996312	0		3.66412	2.33934	1.04858	2.23097	0.0256829	NA
WBGene00010957		0.964267	9.30985	2.81619	2.09893	0.944571	0	0	2.10227		2.27951	2.33862	1.32425	1.76599	0.077397	NA
WBGene00044424		0.964267	2.06886	0.938731	2.09893	0.944571	0	0	0		0.87692	2.33643	1.72403	1.35521	0.175349	NA
WBGene00012681		0	2.06886	1.87746	2.09893	0	0	0.996312	0		0.880195	2.33297	1.84848	1.2621	0.206912	NA
WBGene00020262		6.74987	7.24099	8.44858	2.09893	1.88914	0.954664	0.996312	1.05114		3.6787	2.32579	0.951472	2.44441	0.0145091	NA
WBGene00015594		1.92853	1.03443	0.938731	2.09893	0	0	0.996312	0		0.874617	2.32469	1.72287	1.34931	0.177237	NA
WBGene00012925		1.92853	2.06886	3.75492	2.09893	0	0.954664	0.996312	0		1.47528	2.32439	1.45228	1.6005	0.109487	NA
WBGene00000864		47.2491	57.928	46.9365	35.6819	5.66743	7.63731	12.9521	11.5625		28.2018	2.32134	0.371312	6.25172	4.05969e-10	1.64828e-08
WBGene00013357		0.964267	1.03443	1.87746	2.09893	0.944571	0	0	0		0.864958	2.32028	1.72582	1.34445	0.178802	NA
WBGene00008675		2.8928	1.03443	2.81619	3.1484	0	0	0.996312	1.05114		1.49241	2.31988	1.46082	1.58807	0.11227	NA
WBGene00008111		71.3558	74.4788	59.14	85.0068	11.3349	14.32	17.9336	14.7159		43.5357	2.31532	0.294944	7.85002	4.15969e-15	4.37943e-13
WBGene00009160		4.82134	4.13771	9.38731	6.2968	0	0.954664	1.99262	2.10227		3.71159	2.31483	0.950483	2.43542	0.0148744	NA
WBGene00044586		60.7488	78.6165	64.7724	65.067	14.1686	12.4106	16.9373	10.5114		40.4041	2.3135	0.299154	7.73349	1.04634e-14	1.0649e-12
WBGene00189956		17.3568	23.7918	33.7943	12.5936	1.88914	8.59198	4.98156	2.10227		13.1377	2.31281	0.580268	3.98577	6.72613e-05	0.000594908
WBGene00019832		529.383	594.796	502.221	533.129	126.573	127.925	105.609	73.5796		324.152	2.31242	0.174946	13.2179	6.91675e-40	5.02815e-37
WBGene00017485		261.316	218.264	178.359	140.629	42.5057	41.0505	46.8267	30.483		119.929	2.30992	0.243886	9.4713	2.76392e-21	5.7019e-19
WBGene00015223		60.7488	39.3083	61.9562	36.7313	11.3349	12.4106	11.9557	4.20455		29.8313	2.30982	0.384745	6.00351	1.931e-09	6.74417e-08
WBGene00019920		4.82134	3.10328	5.63238	1.04947	0.944571	0	0.996312	1.05114		2.19981	2.30877	1.2252	1.8844	0.0595104	NA
WBGene00235300		2.8928	2.06886	0.938731	0	0	0	0.996312	0		0.862087	2.30697	1.88278	1.2253	0.220461	NA
WBGene00018178		2.8928	1.03443	3.75492	2.09893	0	0	1.99262	0		1.47171	2.30579	1.53631	1.50086	0.133392	NA
WBGene00007335		1.92853	1.03443	4.69365	2.09893	0	0	0.996312	1.05114		1.47537	2.30507	1.48686	1.5503	0.121071	NA
WBGene00219586		16.3925	6.20657	11.2648	0	1.88914	0	4.98156	0		5.09182	2.30348	1.14787	2.00675	0.0447765	0.108398
WBGene00013757		14.464	10.3443	14.081	4.19787	2.83371	3.81866	1.99262	0		6.46651	2.30063	0.771578	2.98172	0.0028663	0.0129497
WBGene00016550		10.6069	10.3443	6.57111	11.5441	1.88914	0	2.98894	3.15341		5.88724	2.29753	0.760597	3.02069	0.00252197	0.0116876
WBGene00019135		3.85707	0	0.938731	1.04947	0	0	0	1.05114		0.86205	2.29642	1.92314	1.1941	0.232441	NA
WBGene00007080		3.85707	0	0.938731	1.04947	0	0.954664	0	0		0.849991	2.29636	1.9293	1.19026	0.233945	NA
WBGene00012250		3.85707	0	0.938731	1.04947	0	0.954664	0	0		0.849991	2.29636	1.9293	1.19026	0.233945	NA
WBGene00018834		2.8928	0	1.87746	1.04947	0.944571	0	0	0		0.845538	2.29192	1.88843	1.21366	0.224876	NA
WBGene00014944		11.5712	9.30985	11.2648	1.04947	1.88914	2.86399	1.99262	0		4.99263	2.28663	0.917159	2.49317	0.0126609	0.0413436
WBGene00198431		1.92853	1.03443	2.81619	0	0.944571	0	0	0		0.840466	2.28436	1.88967	1.20887	0.226714	NA
WBGene00194703		23.1424	8.27542	23.4683	16.7915	4.72285	0.954664	5.97787	3.15341		10.8108	2.28097	0.612114	3.72639	0.000194244	0.00143926
WBGene00018537		19.2853	15.5164	17.8359	24.1377	1.88914	3.81866	6.97418	3.15341		11.5763	2.28086	0.544703	4.18735	2.82231e-05	0.000284768
WBGene00017526		0.964267	10.3443	4.69365	3.1484	0.944571	0.954664	0.996312	1.05114		2.88716	2.27525	1.11122	2.04752	0.0406072	NA
WBGene00022617		3.85707	0	1.87746	0	0	0	0.996312	0		0.841355	2.27273	2.11938	1.07235	0.283561	NA
WBGene00014239		2.8928	0	2.81619	0	0	0.954664	0	0		0.832957	2.26759	2.11224	1.07355	0.283025	NA
WBGene00014907		53.999	65.1689	61.9562	66.1164	10.3903	10.5013	11.9557	18.9205		37.376	2.26457	0.311808	7.2627	3.79427e-13	2.95527e-11
WBGene00016941		0	0	5.63238	0	0	0	0.996312	0		0.828587	2.24679	2.49244	0.901442	0.367353	NA
WBGene00016198		9.64267	8.27542	17.8359	10.4947	3.77828	1.90933	2.98894	1.05114		6.99704	2.24176	0.693444	3.23279	0.00122586	0.00651598
WBGene00015243		5.7856	1.03443	2.81619	4.19787	0.944571	0.954664	0.996312	0		2.0912	2.2393	1.24035	1.80539	0.0710143	NA
WBGene00219749		32.7851	6.20657	15.9584	14.6925	1.88914	5.72798	2.98894	4.20455		10.5567	2.23902	0.652738	3.43019	0.000603149	0.00361652
WBGene00022017		157.176	159.302	151.136	132.233	31.1708	27.6853	33.8746	34.6875		90.908	2.2379	0.207367	10.792	3.75561e-27	1.19444e-24
WBGene00001859		105.105	105.512	113.586	83.9574	27.3926	16.2293	22.9152	19.9716		61.8336	2.23789	0.255516	8.75832	1.98176e-18	3.0871e-16
WBGene00004275		27.9637	22.7574	41.3041	12.5936	10.3903	5.72798	4.98156	1.05114		15.8462	2.22816	0.562079	3.96413	7.3663e-05	0.000641692
WBGene00022162		5.7856	2.06886	5.63238	0	1.88914	0	0.996312	0		2.04654	2.21535	1.41004	1.57112	0.116155	NA
WBGene00009414		1.92853	3.10328	0.938731	3.1484	0.944571	0.954664	0	0		1.37727	2.20867	1.49423	1.47813	0.139372	NA
WBGene00011910		26.0352	22.7574	33.7943	22.0388	4.72285	4.77332	2.98894	10.5114		15.9528	2.20185	0.476405	4.6218	3.80429e-06	5.13041e-05
WBGene00020686		7.71414	6.20657	8.44858	13.6431	1.88914	2.86399	2.98894	0		5.4693	2.19873	0.784071	2.80425	0.0050433	0.0201179
WBGene00044182		2.8928	0	0.938731	5.24734	0	0.954664	0.996312	0		1.37873	2.19672	1.63972	1.33969	0.180346	NA
WBGene00016825		6.74987	4.13771	7.50984	4.19787	1.88914	0	0	3.15341		3.45473	2.19019	1.00307	2.18348	0.0290004	NA
WBGene00010157		10.6069	10.3443	5.63238	9.4452	0.944571	0.954664	3.98525	2.10227		5.50195	2.18349	0.769346	2.83812	0.00453806	0.0185384
WBGene00012832		2.8928	0	2.81619	3.1484	1.88914	0	0	0		1.34332	2.18332	1.68958	1.29223	0.196279	NA
WBGene00202122		1.92853	1.03443	1.87746	4.19787	0	0	1.99262	0		1.37886	2.1807	1.57218	1.38706	0.165424	NA
WBGene00020116		6.74987	1.03443	6.57111	12.5936	0	1.90933	1.99262	2.10227		4.11916	2.17784	0.978069	2.22668	0.0259689	0.0716631
WBGene00018056		6.74987	18.6197	13.1422	19.9399	1.88914	0	7.9705	3.15341		8.93309	2.1752	0.720986	3.01697	0.00255311	0.0118003
WBGene00016752		2.8928	2.06886	2.81619	1.04947	0.944571	0	0.996312	0		1.34602	2.1706	1.49235	1.45449	0.145811	NA
WBGene00017902		2.8928	2.06886	2.81619	1.04947	0	0.954664	0	1.05114		1.35414	2.16816	1.49134	1.45383	0.145992	NA
WBGene00017817		2.8928	2.06886	2.81619	1.04947	0	0.954664	0.996312	0		1.34729	2.16814	1.49216	1.45302	0.146218	NA
WBGene00022685		23.1424	15.5164	15.9584	25.1872	4.72285	2.86399	5.97787	4.20455		12.1967	2.16793	0.518774	4.17895	2.92864e-05	0.000293364
WBGene00021993		16.3925	3.10328	7.50984	4.19787	0	0.954664	2.98894	3.15341		4.78757	2.16494	0.928402	2.3319	0.0197059	0.0578291
WBGene00018671		11.5712	9.30985	10.326	17.8409	0.944571	1.90933	2.98894	5.25568		7.51832	2.16321	0.671684	3.22057	0.00127934	0.00675324
WBGene00189979		0.964267	1.03443	4.69365	2.09893	0	0.954664	0	1.05114		1.34964	2.1631	1.53869	1.4058	0.159783	NA
WBGene00010584		18.3211	10.3443	18.7746	23.0883	2.83371	4.77332	0.996312	7.35796		10.8112	2.15493	0.58843	3.66217	0.000250086	0.00178569
WBGene00013153		16.3925	18.6197	12.2035	18.8904	0.944571	5.72798	2.98894	5.25568		10.1279	2.1538	0.578865	3.72073	0.000198646	0.0014664
WBGene00004962		1.92853	0	4.69365	2.09893	0	0.954664	0.996312	0		1.33401	2.15338	1.61613	1.33243	0.18272	NA
WBGene00021908		2.8928	6.20657	9.38731	3.1484	1.88914	1.90933	0	1.05114		3.31059	2.148	1.00378	2.13992	0.0323616	NA
WBGene00019561		4.82134	2.06886	6.57111	0	0	0	0	3.15341		2.07684	2.1462	1.53133	1.40153	0.161056	NA
WBGene00022546		14.464	16.5508	32.8556	18.8904	8.50114	1.90933	0.996312	7.35796		12.6907	2.1456	0.59703	3.59379	0.000325907	0.00222808
WBGene00013182		7.71414	9.30985	8.44858	9.4452	0.944571	2.86399	1.99262	2.10227		5.35265	2.1449	0.745682	2.87643	0.00402202	0.016896
WBGene00014920		7.71414	8.27542	7.50984	11.5441	0.944571	1.90933	1.99262	3.15341		5.38043	2.14284	0.751998	2.84954	0.00437831	0.0180257
WBGene00019133		104.141	132.407	100.444	87.1058	22.6697	21.0026	31.882	21.0227		65.0843	2.13474	0.257353	8.29498	1.08607e-16	1.40509e-14
WBGene00009867		23.1424	52.7558	30.9781	38.8303	12.2794	11.456	2.98894	6.30682		22.3422	2.1289	0.454932	4.6796	2.87434e-06	4.07047e-05
WBGene00022570		38.5707	25.8607	23.4683	19.9399	2.83371	6.68265	5.97787	9.46023		16.5992	2.12462	0.472243	4.49899	6.82781e-06	8.50884e-05
WBGene00010746		113.784	119.994	122.035	32.5335	19.836	19.0933	42.8414	7.35796		59.6843	2.12253	0.464945	4.56511	4.99228e-06	6.49914e-05
WBGene00006620		117.641	114.821	107.954	123.837	34.9491	38.1866	11.9557	21.0227		71.2959	2.12237	0.288732	7.35066	1.97226e-13	1.63633e-11
WBGene00022689		1.92853	1.03443	5.63238	4.19787	0	0.954664	1.99262	0		1.96756	2.1192	1.31441	1.61228	0.106901	NA
WBGene00021580		0.964267	5.17214	7.50984	3.1484	0.944571	2.86399	0	0		2.5754	2.11477	1.20816	1.75041	0.0800478	NA
WBGene00014863		0	0	0	3.1484	0	0	0	0		0.39355	2.1093	3.47993	0.606132	0.544427	NA
WBGene00219895		0	0	0	3.1484	0	0	0	0		0.39355	2.1093	3.47993	0.606132	0.544427	NA
WBGene00195155		10.6069	7.24099	18.7746	9.4452	4.72285	1.90933	2.98894	1.05114		7.0925	2.10212	0.695947	3.02052	0.00252341	0.0116876
WBGene00019598		559.275	648.586	561.361	593.998	136.963	118.378	146.458	149.261		364.285	2.10149	0.135222	15.541	1.82996e-54	3.49202e-51
WBGene00009249		0	1.03443	0	2.09893	0	0	0	0		0.39167	2.10015	2.97874	0.705044	0.480783	NA
WBGene00044215		0	1.03443	0	2.09893	0	0	0	0		0.39167	2.10015	2.97874	0.705044	0.480783	NA
WBGene00197145		0	1.03443	0	2.09893	0	0	0	0		0.39167	2.10015	2.97874	0.705044	0.480783	NA
WBGene00007388		416.563	489.284	416.796	522.635	128.462	127.925	82.6939	90.3978		284.345	2.10012	0.181184	11.5911	4.57247e-31	2.05304e-28
WBGene00002026		45.3206	35.1705	19.7133	30.4345	4.72285	13.3653	4.98156	7.35796		20.1333	2.09885	0.459091	4.57175	4.83671e-06	6.33796e-05
WBGene00000012		8.6784	10.3443	18.7746	12.5936	3.77828	3.81866	0.996312	3.15341		7.7672	2.09804	0.650624	3.22466	0.00126122	0.00667839
WBGene00005183		0	2.06886	0	1.04947	0	0	0	0		0.38979	2.09433	2.98276	0.702143	0.48259	NA
WBGene00014964		0	2.06886	0	1.04947	0	0	0	0		0.38979	2.09433	2.98276	0.702143	0.48259	NA
WBGene00043991		0	2.06886	0	1.04947	0	0	0	0		0.38979	2.09433	2.98276	0.702143	0.48259	NA
WBGene00194785		0	2.06886	0	1.04947	0	0	0	0		0.38979	2.09433	2.98276	0.702143	0.48259	NA
WBGene00197598		0.964267	1.03443	0	3.1484	0.944571	0	0	0		0.761458	2.09354	1.97545	1.05978	0.289246	NA
WBGene00013226		45.3206	55.8591	54.4464	37.7808	13.224	7.63731	9.96312	14.7159		29.8684	2.09188	0.345319	6.05783	1.37974e-09	5.00311e-08
WBGene00013318		5.7856	2.06886	4.69365	4.19787	0.944571	0.954664	0.996312	1.05114		2.58658	2.09157	1.05989	1.97339	0.0484512	NA
WBGene00008828		0	3.10328	0	0	0	0	0	0		0.38791	2.09085	3.48115	0.60062	0.548093	NA
WBGene00198325		0	3.10328	0	0	0	0	0	0		0.38791	2.09085	3.48115	0.60062	0.548093	NA
WBGene00012679		0	1.03443	0.938731	3.1484	0	0	0	1.05114		0.771587	2.08786	1.96852	1.06062	0.288861	NA
WBGene00044952		0	1.03443	0.938731	3.1484	0	0	0	1.05114		0.771587	2.08786	1.96852	1.06062	0.288861	NA
WBGene00047393		0.964267	3.10328	0	1.04947	0	0	0.996312	0		0.764166	2.08721	1.9728	1.05799	0.290058	NA
WBGene00007559		0	2.06886	0.938731	2.09893	0	0	0.996312	0		0.762854	2.08441	1.94316	1.07269	0.28341	NA
WBGene00020291		0	3.10328	0.938731	1.04947	0	0	0	1.05114		0.767827	2.08158	1.96971	1.05679	0.290605	NA
WBGene00016220		1.92853	1.03443	0	2.09893	0.944571	0	0	0		0.750808	2.07515	1.94884	1.06481	0.286963	NA
WBGene00020669		0.964267	0	0.938731	3.1484	0	0.954664	0	0		0.750758	2.07292	1.97858	1.04768	0.294787	NA
WBGene00005338		0.964267	0	0	2.09893	0	0	0	0		0.3829	2.07244	2.99776	0.69133	0.489358	NA
WBGene00013888		0.964267	0	0	2.09893	0	0	0	0		0.3829	2.07244	2.99776	0.69133	0.489358	NA
WBGene00171255		0.964267	0	0	2.09893	0	0	0	0		0.3829	2.07244	2.99776	0.69133	0.489358	NA
WBGene00012549		4.82134	2.06886	8.44858	1.04947	0	2.86399	0	1.05114		2.53792	2.07072	1.23457	1.67728	0.0934872	NA
WBGene00011363		1.92853	3.10328	0	0	0	0.954664	0	0		0.74831	2.06988	2.18191	0.948656	0.342796	NA
WBGene00012636		0	0	1.87746	3.1484	0.944571	0	0	0		0.746304	2.06811	2.18319	0.947286	0.343493	NA
WBGene00005680		0.964267	2.06886	0.938731	1.04947	0	0	0.996312	0		0.752204	2.0657	1.80456	1.14471	0.25233	NA
WBGene00011710		0.964267	1.03443	0	1.04947	0	0	0	0		0.38102	2.06484	2.60142	0.793736	0.427349	NA
WBGene00015331		0.964267	1.03443	0	1.04947	0	0	0	0		0.38102	2.06484	2.60142	0.793736	0.427349	NA
WBGene00044912		0.964267	1.03443	0	1.04947	0	0	0	0		0.38102	2.06484	2.60142	0.793736	0.427349	NA
WBGene00168535		0.964267	1.03443	0	1.04947	0	0	0	0		0.38102	2.06484	2.60142	0.793736	0.427349	NA
WBGene00197093		0.964267	1.03443	0	1.04947	0	0	0	0		0.38102	2.06484	2.60142	0.793736	0.427349	NA
WBGene00220253		0.964267	1.03443	0	1.04947	0	0	0	0		0.38102	2.06484	2.60142	0.793736	0.427349	NA
WBGene00219740		0	1.03443	1.87746	2.09893	0.944571	0	0	0		0.744424	2.06401	1.95088	1.05799	0.290062	NA
WBGene00044571		0.964267	3.10328	0.938731	0	0.944571	0	0	0		0.743857	2.06341	1.98129	1.04145	0.297668	NA
WBGene00009767		0	0	0.938731	2.09893	0	0	0	0		0.379708	2.06207	3.0037	0.686511	0.492391	NA
WBGene00011991		0	0	0.938731	2.09893	0	0	0	0		0.379708	2.06207	3.0037	0.686511	0.492391	NA
WBGene00015892		0	0	0.938731	2.09893	0	0	0	0		0.379708	2.06207	3.0037	0.686511	0.492391	NA
WBGene00016075		0	0	0.938731	2.09893	0	0	0	0		0.379708	2.06207	3.0037	0.686511	0.492391	NA
WBGene00022746		0	0	0.938731	2.09893	0	0	0	0		0.379708	2.06207	3.0037	0.686511	0.492391	NA
WBGene00006095		0.964267	2.06886	0	0	0	0	0	0		0.37914	2.06057	3.00502	0.68571	0.492896	NA
WBGene00008674		0.964267	2.06886	0	0	0	0	0	0		0.37914	2.06057	3.00502	0.68571	0.492896	NA
WBGene00194868		0.964267	2.06886	0	0	0	0	0	0		0.37914	2.06057	3.00502	0.68571	0.492896	NA
WBGene00196101		0.964267	2.06886	0	0	0	0	0	0		0.37914	2.06057	3.00502	0.68571	0.492896	NA
WBGene00020451		145.604	139.648	137.055	116.491	27.3926	34.3679	26.9004	40.9943		83.5566	2.05953	0.220384	9.34519	9.17276e-21	1.81859e-18
WBGene00012621		6.74987	14.482	8.44858	15.742	2.83371	0.954664	3.98525	3.15341		7.04368	2.05712	0.686471	2.99666	0.00272954	0.0124423
WBGene00013834		2.8928	1.03443	0	1.04947	0	0	0.996312	0		0.746626	2.05708	1.97855	1.03969	0.298484	NA
WBGene00021673		84.8555	99.3051	91.9956	124.887	12.2794	21.0026	27.8967	35.7387		62.245	2.0563	0.295889	6.94957	3.66411e-12	2.35027e-10
WBGene00006661		0	1.03443	0.938731	1.04947	0	0	0	0		0.377828	2.05507	2.60679	0.788352	0.430491	NA
WBGene00013062		0	1.03443	0.938731	1.04947	0	0	0	0		0.377828	2.05507	2.60679	0.788352	0.430491	NA
WBGene00013565		0	1.03443	0.938731	1.04947	0	0	0	0		0.377828	2.05507	2.60679	0.788352	0.430491	NA
WBGene00015604		0	1.03443	0.938731	1.04947	0	0	0	0		0.377828	2.05507	2.60679	0.788352	0.430491	NA
WBGene00195651		0	1.03443	0.938731	1.04947	0	0	0	0		0.377828	2.05507	2.60679	0.788352	0.430491	NA
WBGene00199663		0	1.03443	0.938731	1.04947	0	0	0	0		0.377828	2.05507	2.60679	0.788352	0.430491	NA
WBGene00201190		0	1.03443	0.938731	1.04947	0	0	0	0		0.377828	2.05507	2.60679	0.788352	0.430491	NA
WBGene00005548		23.1424	14.482	20.6521	10.4947	8.50114	3.81866	1.99262	2.10227		10.6482	2.05502	0.594563	3.45635	0.000547553	0.00335977
WBGene00194735		1.92853	0	0	6.2968	0.944571	0	0.996312	0		1.27078	2.05342	1.83986	1.11607	0.264391	NA
WBGene00018506		1.92853	1.03443	0.938731	1.04947	0.944571	0	0	0		0.736966	2.05181	1.80984	1.1337	0.256922	NA
WBGene00194929		1.92853	1.03443	0.938731	1.04947	0.944571	0	0	0		0.736966	2.05181	1.80984	1.1337	0.256922	NA
WBGene00017069		215.996	286.536	227.173	338.978	59.508	45.8239	67.7492	85.1421		165.863	2.05156	0.225779	9.08661	1.02173e-19	1.83502e-17
WBGene00077762		11.5712	3.10328	13.1422	8.39574	1.88914	4.77332	1.99262	0		5.60844	2.05089	0.823469	2.49055	0.0127545	0.041578
WBGene00044240		0	2.06886	0.938731	0	0	0	0	0		0.375948	2.05013	3.01229	0.680588	0.496132	NA
WBGene00007249		0.964267	0	1.87746	2.09893	0	0	0.996312	0		0.742122	2.04902	1.94978	1.05089	0.293307	NA
WBGene00021630		1.92853	2.06886	0.938731	0	0.944571	0	0	0		0.735086	2.04831	1.95405	1.04824	0.294529	NA
WBGene00010992		0.964267	1.03443	1.87746	1.04947	0	0	0	1.05114		0.747095	2.04661	1.80417	1.13438	0.256637	NA
WBGene00004877		0.964267	1.03443	1.87746	1.04947	0	0	0.996312	0		0.740242	2.04659	1.80748	1.13229	0.257511	NA
WBGene00012180		0.964267	1.03443	1.87746	1.04947	0	0	0.996312	0		0.740242	2.04659	1.80748	1.13229	0.257511	NA
WBGene00044293		3.85707	5.17214	0.938731	2.09893	1.88914	0.954664	0	0		1.86383	2.04658	1.32676	1.54254	0.122943	NA
WBGene00219972		6.74987	8.27542	10.326	19.9399	0	3.81866	1.99262	5.25568		7.04477	2.04565	0.749062	2.73095	0.00631514	0.0239988
WBGene00168989		1.92853	9.30985	4.69365	4.19787	2.83371	0.954664	0.996312	0		3.11432	2.04297	1.04225	1.96017	0.0499765	NA
WBGene00010692		0.964267	2.06886	1.87746	0	0.944571	0	0	0		0.731894	2.04268	1.95512	1.04478	0.296123	NA
WBGene00018143		0	0	2.81619	2.09893	0	0	0	1.05114		0.745783	2.04243	2.17864	0.937478	0.348513	NA
WBGene00016441		1.92853	3.10328	0	3.1484	0	0.954664	0	1.05114		1.27325	2.0406	1.62136	1.25858	0.208183	NA
WBGene00009421		1.92853	0	0	1.04947	0	0	0	0		0.37225	2.03821	3.02087	0.674708	0.499861	NA
WBGene00013502		1.92853	0	0	1.04947	0	0	0	0		0.37225	2.03821	3.02087	0.674708	0.499861	NA
WBGene00017221		1.92853	0	0	1.04947	0	0	0	0		0.37225	2.03821	3.02087	0.674708	0.499861	NA
WBGene00023162		1.92853	0	0	1.04947	0	0	0	0		0.37225	2.03821	3.02087	0.674708	0.499861	NA
WBGene00196363		1.92853	0	0	1.04947	0	0	0	0		0.37225	2.03821	3.02087	0.674708	0.499861	NA
WBGene00020667		2.8928	0	0.938731	1.04947	0.944571	0	0	0		0.728196	2.03612	1.98676	1.02485	0.305436	NA
WBGene00009646		0.964267	3.10328	0.938731	3.1484	0	0.954664	0.996312	0		1.26321	2.03597	1.54492	1.31784	0.187556	NA
WBGene00015603		0	2.06886	2.81619	0	0	0.954664	0	0		0.729964	2.03549	2.19009	0.929409	0.352677	NA
WBGene00165811		2.8928	1.03443	0.938731	0	0.944571	0	0	0		0.726316	2.0329	1.98745	1.02287	0.306368	NA
WBGene00012682		1.92853	1.03443	0	0	0	0	0	0		0.37037	2.03216	3.0253	0.671722	0.501761	NA
WBGene00019096		1.92853	1.03443	0	0	0	0	0	0		0.37037	2.03216	3.0253	0.671722	0.501761	NA
WBGene00020987		1.92853	1.03443	0	0	0	0	0	0		0.37037	2.03216	3.0253	0.671722	0.501761	NA
WBGene00198159		1.92853	1.03443	0	0	0	0	0	0		0.37037	2.03216	3.0253	0.671722	0.501761	NA
WBGene00220218		1.92853	1.03443	0	0	0	0	0	0		0.37037	2.03216	3.0253	0.671722	0.501761	NA
WBGene00194940		1.92853	0	1.87746	1.04947	0	0	0.996312	0		0.731472	2.03077	1.9534	1.03961	0.298522	NA
WBGene00013526		1.92853	0	1.87746	1.04947	0	0.954664	0	0		0.726266	2.03073	1.95671	1.03783	0.299349	NA
WBGene00022622		1.92853	0	1.87746	1.04947	0	0.954664	0	0		0.726266	2.03073	1.95671	1.03783	0.299349	NA
WBGene00044014		1.92853	0	1.87746	1.04947	0.944571	0	0	0		0.725004	2.03072	1.95752	1.0374	0.299551	NA
WBGene00009377		9.64267	9.30985	4.69365	5.24734	0.944571	0	0	6.30682		4.51811	2.03019	0.978895	2.07396	0.0380828	0.0960153
WBGene00005579		0.964267	0	0.938731	1.04947	0	0	0	0		0.369058	2.02846	2.62198	0.773634	0.439147	NA
WBGene00013524		0.964267	0	0.938731	1.04947	0	0	0	0		0.369058	2.02846	2.62198	0.773634	0.439147	NA
WBGene00044346		0.964267	0	0.938731	1.04947	0	0	0	0		0.369058	2.02846	2.62198	0.773634	0.439147	NA
WBGene00050744		0.964267	0	0.938731	1.04947	0	0	0	0		0.369058	2.02846	2.62198	0.773634	0.439147	NA
WBGene00195519		0.964267	0	0.938731	1.04947	0	0	0	0		0.369058	2.02846	2.62198	0.773634	0.439147	NA
WBGene00195771		0.964267	0	0.938731	1.04947	0	0	0	0		0.369058	2.02846	2.62198	0.773634	0.439147	NA
WBGene00197025		0.964267	0	0.938731	1.04947	0	0	0	0		0.369058	2.02846	2.62198	0.773634	0.439147	NA
WBGene00015840		1.92853	1.03443	1.87746	0	0	0	0.996312	0		0.729592	2.02759	1.95406	1.03763	0.299442	NA
WBGene00011617		1.92853	1.03443	1.87746	0	0.944571	0	0	0		0.723124	2.02754	1.95819	1.03541	0.300476	NA
WBGene00013886		1.92853	1.03443	1.87746	0	0.944571	0	0	0		0.723124	2.02754	1.95819	1.03541	0.300476	NA
WBGene00007151		1.92853	4.13771	0	2.09893	0	0	1.99262	0		1.26973	2.02614	1.74183	1.16322	0.244739	NA
WBGene00206512		0.964267	0	2.81619	1.04947	0.944571	0	0	0		0.721812	2.02465	1.98904	1.01791	0.308723	NA
WBGene00012411		0.964267	1.03443	0.938731	0	0	0	0	0		0.367178	2.0228	2.62533	0.770493	0.441008	NA
WBGene00015835		0.964267	1.03443	0.938731	0	0	0	0	0		0.367178	2.0228	2.62533	0.770493	0.441008	NA
WBGene00023255		0.964267	1.03443	0.938731	0	0	0	0	0		0.367178	2.0228	2.62533	0.770493	0.441008	NA
WBGene00044981		0.964267	1.03443	0.938731	0	0	0	0	0		0.367178	2.0228	2.62533	0.770493	0.441008	NA
WBGene00045117		0.964267	1.03443	0.938731	0	0	0	0	0		0.367178	2.0228	2.62533	0.770493	0.441008	NA
WBGene00169578		0.964267	1.03443	0.938731	0	0	0	0	0		0.367178	2.0228	2.62533	0.770493	0.441008	NA
WBGene00219414		0.964267	1.03443	0.938731	0	0	0	0	0		0.367178	2.0228	2.62533	0.770493	0.441008	NA
WBGene00220105		0.964267	1.03443	0.938731	0	0	0	0	0		0.367178	2.0228	2.62533	0.770493	0.441008	NA
WBGene00020228		0.964267	1.03443	2.81619	0	0	0	0.996312	0		0.7264	2.02148	1.98557	1.01809	0.308637	NA
WBGene00194864		0.964267	1.03443	2.81619	0	0.944571	0	0	0		0.719932	2.02142	1.98974	1.01592	0.309667	NA
WBGene00008696		0.964267	3.10328	2.81619	1.04947	0.944571	0.954664	0	0		1.22906	2.01798	1.54711	1.30435	0.192113	NA
WBGene00005786		0	0	1.87746	1.04947	0	0	0	0		0.365866	2.01695	3.03599	0.664349	0.506467	NA
WBGene00009752		0	0	1.87746	1.04947	0	0	0	0		0.365866	2.01695	3.03599	0.664349	0.506467	NA
WBGene00011001		0	0	1.87746	1.04947	0	0	0	0		0.365866	2.01695	3.03599	0.664349	0.506467	NA
WBGene00011192		0	0	1.87746	1.04947	0	0	0	0		0.365866	2.01695	3.03599	0.664349	0.506467	NA
WBGene00011405		0	0	1.87746	1.04947	0	0	0	0		0.365866	2.01695	3.03599	0.664349	0.506467	NA
WBGene00022763		0	0	1.87746	1.04947	0	0	0	0		0.365866	2.01695	3.03599	0.664349	0.506467	NA
WBGene00016388		1.92853	1.03443	1.87746	3.1484	0	0.954664	0	1.05114		1.24933	2.0155	1.52314	1.32325	0.185751	NA
WBGene00022778		0	1.03443	3.75492	0	0	0	0	1.05114		0.730061	2.01245	2.23146	0.901854	0.367134	NA
WBGene00077684		1.92853	4.13771	0.938731	1.04947	0	0	1.99262	0		1.25588	2.01236	1.63396	1.23159	0.218103	NA
WBGene00010960		15304.8	16365.7	19294.7	17255.3	3238.93	4790.5	4222.37	4667.05		10642.4	2.01163	0.144783	13.8941	6.87714e-44	6.9991e-41
WBGene00195820		0	1.03443	2.81619	4.19787	0	0	0.996312	1.05114		1.26199	2.01086	1.65833	1.21258	0.22529	NA
WBGene00004351		0	1.03443	1.87746	0	0	0	0	0		0.363986	2.01082	3.04054	0.661337	0.508397	NA
WBGene00010996		0	1.03443	1.87746	0	0	0	0	0		0.363986	2.01082	3.04054	0.661337	0.508397	NA
WBGene00044378		0	1.03443	1.87746	0	0	0	0	0		0.363986	2.01082	3.04054	0.661337	0.508397	NA
WBGene00201202		0	1.03443	1.87746	0	0	0	0	0		0.363986	2.01082	3.04054	0.661337	0.508397	NA
WBGene00201757		0	1.03443	1.87746	0	0	0	0	0		0.363986	2.01082	3.04054	0.661337	0.508397	NA
WBGene00001892		0.964267	2.06886	2.81619	2.09893	0	0.954664	0	1.05114		1.24426	2.01057	1.52312	1.32003	0.186826	NA
WBGene00004932		39.535	73.4444	47.8753	126.986	18.8914	9.54664	19.9262	23.125		44.9162	2.01038	0.408445	4.92203	8.56496e-07	1.45442e-05
WBGene00007714		3.85707	3.10328	2.81619	2.09893	0.944571	0.954664	0	1.05114		1.85323	2.01029	1.23237	1.63124	0.102841	NA
WBGene00199937		0.964267	1.03443	3.75492	2.09893	0.944571	0.954664	0	0		1.21897	2.00788	1.55778	1.28894	0.197419	NA
WBGene00220102		1.92853	0	2.81619	0	0.944571	0	0	0		0.711162	2.00236	2.19995	0.910183	0.362726	NA
WBGene00009252		5.7856	3.10328	7.50984	7.34627	1.88914	0	1.99262	2.10227		3.71613	2.0022	0.911493	2.19662	0.0280477	NA
WBGene00011790		2.8928	0	2.81619	2.09893	0.944571	0.954664	0	0		1.2134	2.00218	1.62584	1.23148	0.218145	NA
WBGene00004971		2.8928	0	0	0	0	0	0	0		0.3616	2.00142	3.48731	0.573916	0.566025	NA
WBGene00013478		0.964267	2.06886	2.81619	2.09893	0	0	0.996312	1.05114		1.24946	2.00108	1.5228	1.31408	0.188818	NA
WBGene00018360		11.5712	7.24099	14.081	6.2968	2.83371	1.90933	1.99262	3.15341		6.13488	1.99703	0.705732	2.82973	0.00465868	0.0189551
WBGene00008950		0.964267	1.03443	5.63238	4.19787	0	0.954664	0.996312	1.05114		1.85388	1.99596	1.31071	1.52281	0.127807	NA
WBGene00018497		0.964267	0	3.75492	0	0	0.954664	0	0		0.709232	1.99545	2.24672	0.88816	0.374455	NA
WBGene00008367		1.92853	0	0.938731	0	0	0	0	0		0.358408	1.99239	3.05427	0.652329	0.514189	NA
WBGene00020454		1.92853	0	0.938731	0	0	0	0	0		0.358408	1.99239	3.05427	0.652329	0.514189	NA
WBGene00021302		1.92853	0	0.938731	0	0	0	0	0		0.358408	1.99239	3.05427	0.652329	0.514189	NA
WBGene00170269		1.92853	0	0.938731	0	0	0	0	0		0.358408	1.99239	3.05427	0.652329	0.514189	NA
WBGene00172412		1.92853	0	0.938731	0	0	0	0	0		0.358408	1.99239	3.05427	0.652329	0.514189	NA
WBGene00194738		1.92853	0	0.938731	0	0	0	0	0		0.358408	1.99239	3.05427	0.652329	0.514189	NA
WBGene00195626		1.92853	0	0.938731	0	0	0	0	0		0.358408	1.99239	3.05427	0.652329	0.514189	NA
WBGene00198235		1.92853	0	0.938731	0	0	0	0	0		0.358408	1.99239	3.05427	0.652329	0.514189	NA
WBGene00201111		1.92853	0	0.938731	0	0	0	0	0		0.358408	1.99239	3.05427	0.652329	0.514189	NA
WBGene00009938		1.92853	0	3.75492	2.09893	0.944571	0	0	1.05114		1.22226	1.99125	1.63447	1.21829	0.223115	NA
WBGene00020641		0	0	4.69365	0	0	0	0.996312	0		0.711246	1.98484	2.57922	0.769548	0.441568	NA
WBGene00044606		0	0	4.69365	0	0	0	0.996312	0		0.711246	1.98484	2.57922	0.769548	0.441568	NA
WBGene00005222		7.71414	10.3443	6.57111	10.4947	1.88914	2.86399	1.99262	2.10227		5.49653	1.98289	0.722872	2.74307	0.00608679	0.0233004
WBGene00021428		9.64267	0	4.69365	1.04947	0.944571	1.90933	0	1.05114		2.41135	1.98186	1.31738	1.50439	0.13248	NA
WBGene00001728		0.964267	0	1.87746	0	0	0	0	0		0.355216	1.98148	3.06226	0.647064	0.517591	NA
WBGene00195302		0.964267	0	1.87746	0	0	0	0	0		0.355216	1.98148	3.06226	0.647064	0.517591	NA
WBGene00021301		25.0709	9.30985	11.2648	12.5936	2.83371	4.77332	2.98894	4.20455		9.12996	1.98083	0.610296	3.24569	0.00117168	0.00629596
WBGene00015623		63.6416	95.1674	58.2013	15.742	15.1131	10.5013	16.9373	16.8182		36.5153	1.9736	0.456897	4.31957	1.56331e-05	0.000172814
WBGene00010596		0	0	2.81619	0	0	0	0	0		0.352024	1.9674	3.48975	0.563765	0.572914	NA
WBGene00044130		0	0	2.81619	0	0	0	0	0		0.352024	1.9674	3.48975	0.563765	0.572914	NA
WBGene00235319		0	0	2.81619	0	0	0	0	0		0.352024	1.9674	3.48975	0.563765	0.572914	NA
WBGene00021491		188.032	105.512	176.481	44.0776	53.8405	29.5946	41.8451	6.30682		80.7112	1.96483	0.692232	2.8384	0.00453405	0.018527
WBGene00086556		3.85707	3.10328	0.938731	11.5441	0	1.90933	0.996312	2.10227		3.05639	1.96061	1.10826	1.76909	0.0768795	NA
WBGene00016612		6.74987	0	2.81619	2.09893	0	0	0.996312	2.10227		1.84545	1.95555	1.45173	1.34705	0.177964	NA
WBGene00009143		7.71414	1.03443	8.44858	9.4452	0	4.77332	0	2.10227		4.18974	1.95442	1.03907	1.88093	0.0599815	0.134857
WBGene00021010		8.6784	4.13771	3.75492	6.2968	1.88914	0.954664	1.99262	1.05114		3.59443	1.9542	0.899987	2.17136	0.0299039	NA
WBGene00018852		181.282	249.297	227.173	281.257	42.5057	42.9599	73.7271	84.091		147.787	1.95233	0.247244	7.89635	2.87194e-15	3.04465e-13
WBGene00000019		20.2496	26.8951	25.3457	10.4947	4.72285	7.63731	5.97787	3.15341		13.0596	1.94477	0.519571	3.74303	0.000181818	0.00136462
WBGene00015574		333.636	201.713	242.192	39.8797	63.2863	79.2371	41.8451	30.483		129.034	1.92719	0.636026	3.03005	0.00244514	0.0114049
WBGene00020357		41.4635	38.2738	60.0788	31.484	10.3903	14.32	12.9521	7.35796		27.04	1.92628	0.371974	5.17853	2.23636e-07	4.57643e-06
WBGene00013296		3.85707	1.03443	5.63238	4.19787	1.88914	0	1.99262	0		2.32544	1.91553	1.18838	1.61188	0.106987	NA
WBGene00018997		75.2128	66.2034	67.5886	52.4734	22.6697	20.0479	16.9373	9.46023		41.3242	1.9121	0.304218	6.2853	3.27216e-10	1.37233e-08
WBGene00012898		42.4278	32.0673	30.9781	41.9787	8.50114	12.4106	7.9705	10.5114		23.3557	1.90344	0.367652	5.1773	2.25125e-07	4.60074e-06
WBGene00007853		19.2853	24.8263	12.2035	9.4452	5.66743	4.77332	3.98525	3.15341		10.4175	1.89566	0.566456	3.34652	0.000818319	0.0046631
WBGene00018552		4.82134	2.06886	2.81619	1.04947	0	2.86399	0	0		1.70248	1.89018	1.43896	1.31357	0.18899	NA
WBGene00022545		20.2496	20.6886	31.9168	14.6925	6.612	3.81866	5.97787	7.35796		13.9143	1.89002	0.486158	3.88767	0.00010121	0.000832471
WBGene00021606		66.5344	80.6854	88.2407	64.0175	16.0577	21.0026	19.9262	24.1762		47.5801	1.88853	0.272042	6.94205	3.86445e-12	2.45811e-10
WBGene00001397		661.487	735.478	509.731	817.535	178.524	98.3304	246.089	213.381		432.569	1.88813	0.245981	7.67591	1.64249e-14	1.59709e-12
WBGene00021207		9.64267	3.10328	7.50984	5.24734	2.83371	0	0.996312	3.15341		4.06082	1.88511	0.899334	2.09612	0.0360719	0.0919935
WBGene00017555		8.6784	11.3787	12.2035	14.6925	5.66743	0.954664	4.98156	1.05114		7.45099	1.87985	0.666153	2.82195	0.00477329	0.0193338
WBGene00018712		2.8928	1.03443	3.75492	3.1484	0	1.90933	0	1.05114		1.72388	1.87739	1.32539	1.41648	0.156635	NA
WBGene00018708		67.4987	23.7918	25.3457	23.0883	10.3903	14.32	3.98525	9.46023		22.235	1.8713	0.498027	3.75742	0.000171676	0.00130519
WBGene00010786		6.74987	13.4476	14.081	12.5936	3.77828	0.954664	5.97787	2.10227		7.46064	1.87042	0.66198	2.82549	0.00472086	0.0191672
WBGene00015690		0.964267	1.03443	5.63238	3.1484	0.944571	0	0.996312	1.05114		1.72144	1.86648	1.32878	1.40465	0.160125	NA
WBGene00017294		431.027	515.145	566.993	720.984	150.187	173.749	118.561	170.284		355.866	1.866	0.19182	9.72787	2.29334e-22	5.07393e-20
WBGene00015018		12.5355	4.13771	3.75492	4.19787	2.83371	3.81866	0	0		3.90979	1.8652	0.996268	1.87219	0.0611808	0.13682
WBGene00022621		5.7856	4.13771	9.38731	2.09893	1.88914	0.954664	0.996312	2.10227		3.41899	1.86376	0.938979	1.98488	0.047158	NA
WBGene00018767		9.64267	5.17214	4.69365	5.24734	2.83371	1.90933	1.99262	0		3.93643	1.85894	0.873335	2.12855	0.0332914	0.086372
WBGene00016063		30.8565	25.8607	15.0197	15.742	7.55657	10.5013	3.98525	2.10227		13.953	1.84322	0.528883	3.48511	0.000491927	0.00309298
WBGene00021472		6.74987	3.10328	8.44858	6.2968	1.88914	0.954664	1.99262	2.10227		3.94215	1.83683	0.84871	2.16426	0.0304443	0.0807889
WBGene00086555		8.6784	0	8.44858	7.34627	2.83371	0	2.98894	1.05114		3.91838	1.83426	1.05024	1.74651	0.0807216	0.169155
WBGene00018083		0.964267	1.03443	9.38731	6.2968	0.944571	0	1.99262	2.10227		2.84028	1.83172	1.15365	1.58776	0.112341	NA
WBGene00015006		1.92853	2.06886	0.938731	2.09893	0	0.954664	0.996312	0		1.12325	1.82884	1.55757	1.17417	0.240328	NA
WBGene00173920		2.8928	3.10328	2.81619	5.24734	0	1.90933	0.996312	1.05114		2.25205	1.82837	1.11785	1.63561	0.101921	NA
WBGene00011127		0.964267	2.06886	1.87746	2.09893	0.944571	0	0.996312	0		1.1188	1.82798	1.55789	1.17337	0.240649	NA
WBGene00016669		38.5707	29.9984	63.8337	2.09893	12.2794	6.68265	18.9299	0		21.5492	1.82698	1.18555	1.54104	0.123306	0.231458
WBGene00013090		9.64267	2.06886	9.38731	3.1484	1.88914	0.954664	2.98894	1.05114		3.89139	1.82498	0.917498	1.98908	0.0466925	0.111873
WBGene00010804		0.964267	4.13771	1.87746	0	0.944571	0	0	1.05114		1.12189	1.82454	1.69869	1.07408	0.282785	NA
WBGene00044207		18.3211	18.6197	20.6521	26.2367	4.72285	4.77332	7.9705	6.30682		13.4504	1.82158	0.466814	3.90215	9.53436e-05	0.000790612
WBGene00004176		12.5355	6.20657	20.6521	5.24734	4.72285	4.77332	0.996312	2.10227		7.15453	1.8215	0.728111	2.50168	0.0123606	0.0406236
WBGene00001150		60.7488	58.9624	76.0372	69.2648	16.0577	16.2293	20.9226	22.0739		42.5371	1.82114	0.276793	6.57943	4.72262e-11	2.41137e-09
WBGene00206415		16.3925	29.9984	31.9168	22.0388	9.44571	6.68265	8.96681	3.15341		16.0744	1.82027	0.464143	3.9218	8.7891e-05	0.000741261
WBGene00006191		2.8928	2.06886	0.938731	1.04947	0.944571	0	0.996312	0		1.11134	1.82013	1.57984	1.1521	0.24928	NA
WBGene00016720		0.964267	2.06886	2.81619	1.04947	0.944571	0.954664	0	0		1.09975	1.81972	1.58189	1.15035	0.250002	NA
WBGene00005423		3.85707	0	0.938731	2.09893	0.944571	0.954664	0	0		1.09925	1.81971	1.70327	1.06836	0.285356	NA
WBGene00077438		3.85707	4.13771	3.75492	2.09893	0	2.86399	0	1.05114		2.22047	1.81961	1.17935	1.54289	0.122859	NA
WBGene00007675		240.103	277.227	260.967	257.119	83.1222	66.8265	63.764	79.8864		166.127	1.81825	0.162842	11.1657	6.00088e-29	2.23438e-26
WBGene00014046		51.1062	31.0328	64.7724	17.8409	16.0577	8.59198	18.9299	3.15341		26.4357	1.81574	0.508633	3.56985	0.000357191	0.00239266
WBGene00013800		1.92853	3.10328	0.938731	1.04947	0	0	0	2.10227		1.14029	1.81492	1.66214	1.09192	0.274869	NA
WBGene00008071		1.92853	2.06886	1.87746	1.04947	0	0.954664	0.996312	0		1.10941	1.8139	1.55811	1.16417	0.244356	NA
WBGene00009005		0.964267	1.03443	2.81619	2.09893	0	0.954664	0	1.05114		1.11495	1.81212	1.57852	1.14799	0.250973	NA
WBGene00077636		70.3915	86.8919	86.3632	71.3638	19.836	19.0933	29.8894	21.0227		50.6065	1.81203	0.26242	6.90506	5.01815e-12	3.17872e-10
WBGene00219326		3.85707	1.03443	4.69365	1.04947	0	0	0	3.15341		1.7235	1.81097	1.47334	1.22916	0.219014	NA
WBGene00018406		0.964267	0	3.75492	2.09893	0.944571	0.954664	0	0		1.08967	1.80784	1.70394	1.06098	0.288701	NA
WBGene00004149		20.2496	15.5164	16.8972	12.5936	4.72285	4.77332	4.98156	4.20455		10.4924	1.80574	0.518381	3.48343	0.00049503	0.0031027
WBGene00017325		1.92853	0	2.81619	2.09893	0.944571	0	0	1.05114		1.10492	1.80429	1.66232	1.08541	0.27774	NA
WBGene00195182		0	1.03443	4.69365	1.04947	1.88914	0	0	0		1.08334	1.80383	1.87427	0.962413	0.335842	NA
WBGene00008631		8.6784	5.17214	4.69365	5.24734	3.77828	1.90933	0	1.05114		3.81629	1.80183	0.896085	2.01078	0.0443487	NA
WBGene00018647		330.744	319.638	298.516	248.724	89.7342	89.7384	73.7271	90.3978		192.652	1.8017	0.165517	10.8853	1.35478e-27	4.70049e-25
WBGene00010754		50.1419	36.205	56.3238	32.5335	13.224	5.72798	14.9447	16.8182		28.2399	1.79835	0.376292	4.77914	1.76048e-06	2.67418e-05
WBGene00021500		2.8928	4.13771	3.75492	16.7915	2.83371	0.954664	1.99262	2.10227		4.43252	1.79778	0.902029	1.99305	0.0462565	0.111187
WBGene00003356		0	3.10328	7.50984	3.1484	0.944571	0	0.996312	2.10227		2.22559	1.7905	1.27394	1.40549	0.159876	NA
WBGene00012572		23.1424	14.482	27.2232	19.9399	6.612	6.68265	4.98156	6.30682		13.6713	1.78862	0.46802	3.82168	0.000132547	0.00104248
WBGene00011539		26.0352	27.9295	23.4683	13.6431	11.3349	6.68265	3.98525	4.20455		14.6604	1.7876	0.488826	3.65692	0.000255268	0.00181505
WBGene00021619		7.71414	2.06886	9.38731	11.5441	1.88914	0.954664	2.98894	3.15341		4.96257	1.78568	0.809494	2.20592	0.0273893	0.0744526
WBGene00009589		0.964267	1.03443	3.75492	1.04947	0	0	0.996312	1.05114		1.10632	1.78493	1.61126	1.10778	0.267957	NA
WBGene00010510		8.6784	6.20657	10.326	5.24734	0.944571	2.86399	1.99262	3.15341		4.92662	1.78104	0.760144	2.34303	0.0191281	0.0566678
WBGene00019159		2.8928	5.17214	5.63238	3.1484	2.83371	0	0.996312	1.05114		2.71586	1.78097	1.03802	1.71573	0.0862106	NA
WBGene00015627		4.82134	2.06886	3.75492	6.2968	0.944571	0.954664	1.99262	1.05114		2.73561	1.77943	1.00434	1.77175	0.0764366	NA
WBGene00013826		141.747	167.577	125.79	159.519	43.4503	27.6853	47.823	54.6591		96.0314	1.77915	0.227919	7.80607	5.90002e-15	6.12719e-13
WBGene00012849		2.8928	3.10328	0.938731	3.1484	1.88914	0	0.996312	0		1.62108	1.77795	1.34806	1.3189	0.187203	NA
WBGene00018751		3.85707	0	2.81619	0	0.944571	0	0	1.05114		1.08362	1.77506	1.85155	0.958691	0.337715	NA
WBGene00018348		12.5355	17.5853	15.9584	24.1377	9.44571	5.72798	1.99262	3.15341		11.3171	1.77205	0.551175	3.21504	0.00130426	0.00684689
WBGene00018768		0.964267	0	0	3.1484	0	0	0	1.05114		0.645476	1.77189	2.29838	0.770932	0.440747	NA
WBGene00014132		107.034	97.2362	87.3019	121.738	33.06	35.3226	20.9226	31.5341		66.7687	1.77127	0.242776	7.2959	2.96678e-13	2.34668e-11
WBGene00219608		2.8928	0	3.75492	0	0.944571	0	0.996312	0		1.07358	1.77073	1.85407	0.955054	0.33955	NA
WBGene00235277		4.82134	6.20657	3.75492	2.09893	0.944571	0.954664	0.996312	2.10227		2.73495	1.77064	1.00373	1.76406	0.0777226	NA
WBGene00021996		11.5712	2.06886	10.326	6.2968	0.944571	1.90933	2.98894	3.15341		4.90739	1.76917	0.818589	2.16125	0.0306764	0.0812467
WBGene00021283		1.92853	1.03443	3.75492	0	0	0	0.996312	1.05114		1.09567	1.76847	1.70066	1.03987	0.2984	NA
WBGene00018325		12.5355	8.27542	9.38731	10.4947	1.88914	1.90933	0.996312	7.35796		6.6057	1.76718	0.699871	2.52501	0.0115694	0.0386945
WBGene00017059		4.82134	1.03443	6.57111	4.19787	0.944571	1.90933	0.996312	1.05114		2.69076	1.76555	1.0365	1.70339	0.088496	NA
WBGene00018148		0	0	0.938731	3.1484	0.944571	0	0	0		0.628963	1.76473	2.31355	0.762781	0.445594	NA
WBGene00022311		5.7856	3.10328	5.63238	2.09893	1.88914	0	1.99262	1.05114		2.69414	1.76167	1.03995	1.694	0.0902659	NA
WBGene00017554		3.85707	2.06886	0.938731	3.1484	1.88914	0	0	1.05114		1.61917	1.76102	1.35795	1.29682	0.194692	NA
WBGene00020655		0.964267	3.10328	0	0	0	0	0.996312	0		0.632983	1.75957	2.30877	0.762123	0.445986	NA
WBGene00013620		0	1.03443	0.938731	2.09893	0	0	0.996312	0		0.633551	1.75838	2.05577	0.855342	0.392362	NA
WBGene00021067		0	1.03443	0.938731	2.09893	0	0	0	1.05114		0.640404	1.75833	2.05051	0.857507	0.391165	NA
WBGene00022651		0	1.03443	0.938731	2.09893	0	0	0	1.05114		0.640404	1.75833	2.05051	0.857507	0.391165	NA
WBGene00022799		0.964267	3.10328	4.69365	1.04947	0	2.86399	0	0		1.58433	1.75744	1.50152	1.17044	0.241826	NA
WBGene00006554		0.964267	0	5.63238	0	0	0.954664	0.996312	0		1.06845	1.75659	1.92364	0.91316	0.361158	NA
WBGene00197023		0	2.06886	0.938731	1.04947	0	0	0.996312	0		0.631671	1.75459	2.05668	0.853115	0.393596	NA
WBGene00018084		26.9995	28.964	20.6521	40.9292	4.72285	6.68265	7.9705	15.7671		19.086	1.75236	0.447699	3.91416	9.07204e-05	0.000761792
WBGene00003333		0	3.10328	0.938731	0	0.944571	0	0	0		0.623323	1.75227	2.31739	0.756139	0.449566	NA
WBGene00022308		3.85707	2.06886	1.87746	2.09893	1.88914	0	0	1.05114		1.60532	1.74985	1.33585	1.30992	0.190224	NA
WBGene00235329		1.92853	0	0	2.09893	0.944571	0	0	0		0.621505	1.74804	2.28665	0.764454	0.444597	NA
WBGene00012138		10.6069	3.10328	7.50984	5.24734	1.88914	0	3.98525	2.10227		4.30551	1.74569	0.87152	2.00304	0.0451732	0.109082
WBGene00018536		1.92853	1.03443	0	1.04947	0	0.954664	0	0		0.620887	1.74322	2.06355	0.844764	0.398242	NA
WBGene00020305		1.92853	1.03443	0	1.04947	0	0	0.996312	0		0.626093	1.7432	2.05944	0.846445	0.397305	NA
WBGene00005904		1.92853	1.03443	0	1.04947	0	0	0	1.05114		0.632946	1.74318	2.0541	0.848636	0.396084	NA
WBGene00021273		1.92853	2.06886	0	0	0.944571	0	0	0		0.617745	1.73975	2.28924	0.759968	0.447274	NA
WBGene00013987		5.7856	4.13771	5.63238	1.04947	0	0	2.98894	2.10227		2.71205	1.73714	1.13001	1.53728	0.124224	NA
WBGene00006052		10.6069	2.06886	16.8972	6.2968	3.77828	0.954664	3.98525	2.10227		5.83628	1.7363	0.803434	2.1611	0.0306875	0.081262
WBGene00045254		0.964267	1.03443	0.938731	1.04947	0.944571	0	0	0		0.616433	1.7362	1.90563	0.91109	0.362248	NA
WBGene00011469		0	0	1.87746	2.09893	0	0	0	1.05114		0.628442	1.73336	2.27737	0.761124	0.446583	NA
WBGene00199670		0	0	1.87746	2.09893	0	0	0	1.05114		0.628442	1.73336	2.27737	0.761124	0.446583	NA
WBGene00004002		51.1062	61.0312	37.5492	70.3143	17.0023	16.2293	14.9447	17.8693		35.7558	1.73319	0.316989	5.46766	4.56011e-08	1.12828e-06
WBGene00018186		0.964267	2.06886	0.938731	0	0	0	0.996312	0		0.621021	1.73255	2.06197	0.84024	0.400774	NA
WBGene00219941		0.964267	2.06886	0.938731	0	0.944571	0	0	0		0.614553	1.73254	2.06714	0.838133	0.401956	NA
WBGene00077564		3.85707	9.30985	5.63238	10.4947	4.72285	1.90933	0.996312	1.05114		4.7467	1.73116	0.812607	2.13038	0.0331404	0.0860996
WBGene00023247		0	1.03443	1.87746	1.04947	0	0	0	1.05114		0.626562	1.72954	2.05718	0.840732	0.400498	NA
WBGene00019387		0	1.03443	1.87746	1.04947	0	0	0.996312	0		0.619709	1.72953	2.0626	0.838519	0.401739	NA
WBGene00019568		1.92853	3.10328	4.69365	0	0.944571	0.954664	0	1.05114		1.58448	1.7292	1.39631	1.2384	0.215566	NA
WBGene00018531		4.82134	1.03443	0	4.19787	0	0	0.996312	2.10227		1.64403	1.72831	1.51117	1.1437	0.25275	NA
WBGene00043147		4.82134	5.17214	8.44858	1.04947	0.944571	1.90933	0.996312	2.10227		3.1805	1.7262	0.975019	1.77042	0.0766564	NA
WBGene00044760		9.64267	13.4476	10.326	15.742	1.88914	2.86399	6.97418	3.15341		8.00488	1.72615	0.613587	2.8132	0.00490506	0.0197314
WBGene00009571		4.82134	4.13771	3.75492	10.4947	0	0	4.98156	2.10227		3.78656	1.72601	1.00499	1.71744	0.0858992	NA
WBGene00196885		2.8928	0	0	1.04947	0	0	0	1.05114		0.624176	1.72404	2.31239	0.745564	0.455931	NA
WBGene00015660		534.204	655.827	477.814	215.141	153.02	155.61	141.476	120.881		306.747	1.72116	0.272978	6.30511	2.87983e-10	1.23147e-08
WBGene00206414		33.7494	15.5164	26.2845	20.9893	9.44571	8.59198	7.9705	3.15341		15.7126	1.72045	0.468303	3.6738	0.000238971	0.0017192
WBGene00198244		1.92853	0	0.938731	1.04947	0	0	0.996312	0		0.614131	1.71802	2.06548	0.831777	0.405535	NA
WBGene00077581		1.92853	0	0.938731	1.04947	0	0.954664	0	0		0.608924	1.71799	2.06971	0.830064	0.406503	NA
WBGene00020885		1.92853	0	0.938731	1.04947	0.944571	0	0	0		0.607663	1.71798	2.07074	0.829647	0.406739	NA
WBGene00007793		0.964267	3.10328	5.63238	0	0.944571	0	0.996312	1.05114		1.58649	1.71629	1.43983	1.19201	0.233259	NA
WBGene00003540		13.4997	19.6541	13.1422	25.1872	1.88914	6.68265	8.96681	4.20455		11.6533	1.71503	0.543511	3.15546	0.00160245	0.00805113
WBGene00017525		0.964267	0	1.87746	1.04947	0	0	0.996312	0		0.610938	1.71111	2.06712	0.827776	0.407797	NA
WBGene00020745		0.964267	0	1.87746	1.04947	0	0	0.996312	0		0.610938	1.71111	2.06712	0.827776	0.407797	NA
WBGene00010999		7.71414	12.4131	3.75492	11.5441	3.77828	2.86399	2.98894	1.05114		5.76358	1.71053	0.732378	2.33558	0.0195131	0.0574752
WBGene00195165		16.3925	12.4131	18.7746	19.9399	6.612	2.86399	6.97418	4.20455		11.0219	1.70829	0.51608	3.31013	0.000932533	0.0051711
WBGene00194923		0.964267	1.03443	1.87746	0	0	0	0	1.05114		0.615912	1.70731	2.06257	0.827755	0.407809	NA
WBGene00235372		0.964267	1.03443	1.87746	0	0	0	0	1.05114		0.615912	1.70731	2.06257	0.827755	0.407809	NA
WBGene00015244		0.964267	1.03443	1.87746	0	0.944571	0	0	0		0.602591	1.70718	2.07344	0.823356	0.410306	NA
WBGene00194869		0.964267	1.03443	1.87746	0	0.944571	0	0	0		0.602591	1.70718	2.07344	0.823356	0.410306	NA
WBGene00219460		0.964267	1.03443	1.87746	0	0.944571	0	0	0		0.602591	1.70718	2.07344	0.823356	0.410306	NA
WBGene00015839		25.0709	27.9295	34.733	14.6925	8.50114	4.77332	11.9557	6.30682		16.7454	1.70326	0.459604	3.70592	0.000210621	0.00154121
WBGene00021678		40.4992	35.1705	32.8556	46.1766	5.66743	13.3653	13.9484	14.7159		25.2999	1.703	0.364016	4.67836	2.89173e-06	4.0913e-05
WBGene00023284		76.1771	98.2706	86.3632	92.3531	27.3926	24.8213	26.9004	29.4318		57.7138	1.70232	0.236082	7.21071	5.56611e-13	4.22748e-11
WBGene00018124		3.85707	0	0	0	0	0	0.996312	0		0.606673	1.69694	2.68212	0.632688	0.526938	NA
WBGene00015695		1283.44	698.239	877.713	180.508	198.36	231.029	244.096	265.938		497.415	1.69439	0.536941	3.15564	0.00160145	0.00804999
WBGene00017949		17.3568	25.8607	18.7746	24.1377	9.44571	4.77332	4.98156	7.35796		14.0861	1.69325	0.459005	3.68896	0.000225174	0.00163224
WBGene00013070		2.8928	0	0.938731	0	0	0.954664	0	0		0.598275	1.69198	2.33482	0.724673	0.468652	NA
WBGene00168597		2.8928	0	0.938731	0	0	0.954664	0	0		0.598275	1.69198	2.33482	0.724673	0.468652	NA
WBGene00022337		86.784	114.821	119.219	141.678	36.8383	50.5972	28.8931	26.2784		75.6387	1.69194	0.261048	6.48133	9.09173e-11	4.40617e-09
WBGene00019459		2.8928	4.13771	2.81619	0	0	0	0	3.15341		1.62501	1.68812	1.5863	1.06419	0.287244	NA
WBGene00005659		1.92853	0	1.87746	0	0	0	0	1.05114		0.607142	1.68499	2.29203	0.735154	0.462246	NA
WBGene00011557		1.92853	0	1.87746	0	0	0	0.996312	0		0.600288	1.68489	2.29933	0.732773	0.463697	NA
WBGene00023424		1.92853	0	1.87746	0	0.944571	0	0	0		0.593821	1.68479	2.30634	0.730504	0.465082	NA
WBGene00022690		28.928	25.8607	30.9781	40.9292	9.44571	6.68265	13.9484	9.46023		20.7791	1.68162	0.389099	4.32182	1.5475e-05	0.000171313
WBGene00019029		25.0709	33.1017	34.733	43.0282	8.50114	10.5013	13.9484	9.46023		22.2931	1.67937	0.375096	4.47719	7.56331e-06	9.31141e-05
WBGene00007097		256.495	347.568	247.825	391.451	119.016	123.152	66.7529	78.8353		203.887	1.678	0.235719	7.11864	1.08999e-12	7.99987e-11
WBGene00005868		0.964267	0	2.81619	0	0	0.954664	0	0		0.59189	1.67675	2.33957	0.71669	0.473565	NA
WBGene00017055		0.964267	0	2.81619	0	0	0.954664	0	0		0.59189	1.67675	2.33957	0.71669	0.473565	NA
WBGene00198315		0.964267	0	2.81619	0	0	0.954664	0	0		0.59189	1.67675	2.33957	0.71669	0.473565	NA
WBGene00015421		0.964267	0	2.81619	0	0.944571	0	0	0		0.590629	1.67673	2.34095	0.716258	0.473832	NA
WBGene00021978		85.8198	65.1689	43.1816	1.04947	10.3903	14.32	22.9152	13.6648		32.0638	1.67224	0.94172	1.77573	0.0757779	0.160983
WBGene00185097		6.74987	3.10328	3.75492	2.09893	0.944571	0	2.98894	1.05114		2.58646	1.67154	1.07306	1.55774	0.119295	NA
WBGene00015667		21.2139	13.4476	15.0197	23.0883	2.83371	3.81866	6.97418	9.46023		11.982	1.67028	0.518844	3.21924	0.00128532	0.00677311
WBGene00077664		7.71414	2.06886	3.75492	2.09893	0.944571	0.954664	0.996312	2.10227		2.57933	1.66677	1.04843	1.58977	0.111886	NA
WBGene00020609		1.92853	3.10328	6.57111	10.4947	0.944571	0.954664	1.99262	3.15341		3.64286	1.6623	0.933184	1.78132	0.07486	NA
WBGene00010124		574.703	391.014	567.932	486.953	150.187	177.567	144.465	168.182		332.625	1.6585	0.165156	10.042	9.96005e-24	2.53417e-21
WBGene00194981		15.4283	21.723	20.6521	23.0883	3.77828	4.77332	12.9521	4.20455		13.325	1.65493	0.502728	3.29189	0.000995161	0.00546283
WBGene00044220		34.7136	42.4115	28.1619	37.7808	8.50114	10.5013	9.96312	16.8182		23.6065	1.64981	0.365685	4.51155	6.43559e-06	8.03975e-05
WBGene00010712		5.7856	4.13771	7.50984	4.19787	1.88914	0.954664	0.996312	3.15341		3.57807	1.64754	0.871478	1.89052	0.0586888	NA
WBGene00022849		12.5355	15.5164	15.9584	14.6925	2.83371	4.77332	6.97418	4.20455		9.68608	1.64686	0.533871	3.08476	0.00203718	0.00984165
WBGene00235354		6.74987	0	4.69365	4.19787	0	0.954664	0.996312	3.15341		2.59322	1.6465	1.18932	1.3844	0.166235	NA
WBGene00050906		2.8928	3.10328	11.2648	1.04947	1.88914	0	3.98525	0		3.02309	1.64504	1.17031	1.40564	0.15983	NA
WBGene00012409		0	5.17214	0	1.04947	0	0.954664	0.996312	0		1.02157	1.64304	1.94162	0.846219	0.397431	NA
WBGene00019980		9.64267	10.3443	10.326	9.4452	3.77828	3.81866	0.996312	4.20455		6.5695	1.63536	0.643955	2.53956	0.0110992	0.0374453
WBGene00007246		1.92853	5.17214	0	5.24734	0	1.90933	0.996312	1.05114		2.0381	1.63267	1.2938	1.26191	0.20698	NA
WBGene00044250		0.964267	1.03443	0.938731	3.1484	1.88914	0	0	0		0.996871	1.63027	1.73383	0.940274	0.347077	NA
WBGene00019527		0.964267	4.13771	0.938731	3.1484	0.944571	0	1.99262	0		1.51579	1.62907	1.41225	1.15353	0.248694	NA
WBGene00011474		6494.34	6496.21	5667.12	7449.12	2464.39	2211	1810.3	1971.93		4320.55	1.62591	0.134479	12.0905	1.18626e-33	6.24463e-31
WBGene00009874		0.964267	3.10328	0.938731	1.04947	1.88914	0	0	0		0.993111	1.62533	1.73425	0.937197	0.348657	NA
WBGene00235353		76.1771	89.9952	77.9146	75.5616	30.2263	11.456	27.8967	34.6875		52.9894	1.62068	0.292942	5.53244	3.15814e-08	8.19934e-07
WBGene00008209		1.92853	2.06886	0.938731	4.19787	0	0.954664	1.99262	0		1.51016	1.62021	1.38959	1.16596	0.243629	NA
WBGene00016285		5.7856	7.24099	1.87746	9.4452	0.944571	1.90933	3.98525	1.05114		4.02994	1.61846	0.879415	1.84039	0.0657113	0.144463
WBGene00016718		1.92853	4.13771	0.938731	2.09893	0	0.954664	1.99262	0		1.5064	1.617	1.38952	1.16371	0.244541	NA
WBGene00017700		5.7856	7.24099	2.81619	5.24734	2.83371	1.90933	0.996312	1.05114		3.48508	1.61686	0.883672	1.8297	0.0672943	NA
WBGene00018116		0.964267	4.13771	1.87746	2.09893	0.944571	0	1.99262	0		1.50195	1.61626	1.38961	1.16311	0.244786	NA
WBGene00016877		68.463	78.6165	39.4267	118.59	26.448	25.7759	11.9557	35.7387		50.6268	1.60988	0.378292	4.25567	2.08424e-05	0.000220447
WBGene00005688		1.92853	2.06886	1.87746	3.1484	1.88914	0	0	1.05114		1.49544	1.6098	1.35629	1.18691	0.235262	NA
WBGene00201046		2.8928	1.03443	0	2.09893	0.944571	0	0.996312	0		0.995881	1.60958	1.73139	0.929644	0.352556	NA
WBGene00012086		0	2.06886	1.87746	2.09893	0	0.954664	0	1.05114		1.00638	1.609	1.70303	0.944785	0.344768	NA
WBGene00018583		3.85707	2.06886	1.87746	1.04947	0.944571	1.90933	0	0		1.46334	1.60867	1.39054	1.15686	0.247328	NA
WBGene00007947		443.563	451.011	323.862	545.723	133.185	126.016	131.513	188.154		292.878	1.60863	0.197556	8.14266	3.86683e-16	4.685e-14
WBGene00219761		3.85707	1.03443	0	1.04947	1.88914	0	0	0		0.978763	1.60733	1.90526	0.843627	0.398878	NA
WBGene00044655		1.92853	2.06886	2.81619	2.09893	0.944571	0.954664	0.996312	0		1.47601	1.60514	1.30506	1.22994	0.21872	NA
WBGene00017833		0	2.06886	2.81619	1.04947	0.944571	0.954664	0	0		0.979219	1.60179	1.73508	0.92318	0.355913	NA
WBGene00007659		0.964267	3.10328	1.87746	0	0	1.90933	0	0		0.981792	1.60145	1.86219	0.859983	0.389799	NA
WBGene00023271		0	5.17214	0.938731	3.1484	0	0	0.996312	2.10227		1.54473	1.60093	1.53551	1.04261	0.29713	NA
WBGene00000708		606.524	792.372	808.247	505.843	192.692	242.485	222.178	237.557		450.987	1.60069	0.177548	9.01557	1.95854e-19	3.28561e-17
WBGene00198855		3.85707	2.06886	2.81619	0	1.88914	0.954664	0	0		1.44824	1.60018	1.493	1.07179	0.283816	NA
WBGene00019248		1.92853	0	1.87746	2.09893	1.88914	0	0	0		0.974259	1.60007	1.83423	0.872341	0.383022	NA
WBGene00012518		8.6784	53.7902	8.44858	54.5723	11.3349	9.54664	11.9557	8.4091		20.842	1.59945	0.608622	2.62798	0.00858932	0.0306294
WBGene00219424		1.92853	4.13771	2.81619	3.1484	0.944571	0.954664	0	2.10227		2.00404	1.59825	1.15492	1.38386	0.166403	NA
WBGene00010091		9.64267	9.30985	8.44858	8.39574	2.83371	2.86399	2.98894	3.15341		5.95461	1.59792	0.65496	2.43972	0.0146986	0.0464958
WBGene00022218		7.71414	3.10328	3.75492	6.2968	0.944571	2.86399	0.996312	2.10227		3.47204	1.59727	0.891499	1.79167	0.0731857	NA
WBGene00018687		2.8928	2.06886	4.69365	2.09893	0.944571	1.90933	0.996312	0		1.95056	1.59709	1.16986	1.3652	0.172191	NA
WBGene00206358		0	1.03443	2.81619	2.09893	0.944571	0	0	1.05114		0.993158	1.59625	1.73046	0.922443	0.356297	NA
WBGene00015348		6.74987	7.24099	8.44858	7.34627	2.83371	0.954664	3.98525	2.10227		4.9577	1.59579	0.734092	2.17382	0.0297185	0.0792597
WBGene00016527		1.92853	2.06886	1.87746	0	1.88914	0	0	0		0.970499	1.59479	1.83484	0.869171	0.384754	NA
WBGene00017259		3.85707	6.20657	6.57111	4.19787	0	3.81866	0.996312	2.10227		3.46873	1.59438	0.922095	1.72908	0.0837944	NA
WBGene00044137		3.85707	10.3443	5.63238	4.19787	0.944571	0.954664	2.98894	3.15341		4.00915	1.59328	0.851966	1.87012	0.0614671	0.137227
WBGene00015828		138.854	127.235	204.643	117.54	52.896	47.7332	59.7787	34.6875		97.921	1.59189	0.248455	6.40715	1.48263e-10	6.79697e-09
WBGene00001696		1.92853	2.06886	1.87746	0	0.944571	0.954664	0	0		0.971761	1.59188	1.70967	0.931102	0.351801	NA
WBGene00009524		0	2.06886	2.81619	1.04947	0	0.954664	0	1.05114		0.992539	1.5904	1.73057	0.919002	0.358094	NA
WBGene00017333		1.92853	0	0.938731	3.1484	0	0	1.99262	0		1.00104	1.58932	1.85698	0.855862	0.392074	NA
WBGene00021886		264.209	288.605	235.621	259.218	72.732	88.7837	97.6386	89.3466		174.519	1.58868	0.161528	9.83533	7.93058e-23	1.83437e-20
WBGene00011651		2.8928	1.03443	0.938731	1.04947	0	0.954664	0.996312	0		0.9833	1.58825	1.63974	0.968597	0.332746	NA
WBGene00012010		1.92853	3.10328	1.87746	2.09893	0	0	1.99262	1.05114		1.5065	1.58775	1.35441	1.17228	0.241083	NA
WBGene00000706		1.92853	1.03443	1.87746	1.04947	0.944571	0	0	1.05114		0.9857	1.58728	1.61633	0.982024	0.326088	NA
WBGene00044726		1.92853	0	1.87746	2.09893	0	0.954664	0.996312	0		0.981988	1.58568	1.70652	0.929188	0.352792	NA
WBGene00009933		2.8928	2.06886	0.938731	0	0	0.954664	0.996312	0		0.98142	1.58491	1.73287	0.914619	0.360392	NA
WBGene00022344		4.82134	8.27542	4.69365	0	0.944571	0.954664	1.99262	2.10227		2.97307	1.58245	1.05716	1.49689	0.134421	NA
WBGene00007289		0.964267	2.06886	1.87746	1.04947	0	0	0	2.10227		1.00779	1.58198	1.70486	0.927925	0.353446	NA
WBGene00016680		1.92853	10.3443	5.63238	3.1484	0	0.954664	1.99262	4.20455		3.52568	1.581	0.994698	1.58943	0.111963	NA
WBGene00022753		1.92853	0	2.81619	1.04947	1.88914	0	0	0		0.960417	1.57991	1.86663	0.846399	0.39733	NA
WBGene00020619		9.64267	7.24099	8.44858	1.04947	2.83371	0.954664	2.98894	2.10227		4.40766	1.5793	0.853237	1.85095	0.0641766	0.141738
WBGene00009605		6.74987	0	2.81619	2.09893	1.88914	0	0.996312	1.05114		1.9502	1.57534	1.30827	1.20414	0.228536	NA
WBGene00019530		4.82134	1.03443	0	0	0	0.954664	0.996312	0		0.975842	1.57484	1.94978	0.807702	0.419262	NA
WBGene00015436		1.92853	1.03443	1.87746	1.04947	0	0	0.996312	1.05114		0.992167	1.57344	1.61566	0.973868	0.330122	NA
WBGene00007117		2.8928	0	1.87746	1.04947	0	0.954664	0.996312	0		0.971338	1.571	1.73401	0.905992	0.36494	NA
WBGene00012312		1.92853	1.03443	2.81619	0	0	0.954664	0.996312	0		0.966266	1.56401	1.73461	0.90165	0.367243	NA
WBGene00011378		3.85707	3.10328	5.63238	2.09893	0	0.954664	0.996312	3.15341		2.47451	1.56196	1.07714	1.4501	0.14703	NA
WBGene00021979		529.383	559.625	381.125	54.5723	99.18	110.741	182.325	125.085		255.255	1.55957	0.65399	2.3847	0.017093	0.0520947
WBGene00002208		0.964267	1.03443	3.75492	0	0	0.954664	0.996312	0		0.963074	1.55858	1.77241	0.879357	0.379208	NA
WBGene00022319		3.85707	1.03443	5.63238	1.04947	1.88914	0	0	2.10227		1.9456	1.55784	1.29296	1.20487	0.228255	NA
WBGene00013475		2.8928	0	1.87746	1.04947	0	0	0.996312	1.05114		0.983397	1.55753	1.73178	0.899384	0.368448	NA
WBGene00007512		5.7856	2.06886	4.69365	2.09893	0	0	2.98894	2.10227		2.46728	1.55678	1.13897	1.36683	0.171679	NA
WBGene00044222		12.5355	11.3787	14.081	19.9399	3.77828	6.68265	4.98156	4.20455		9.69776	1.55576	0.53574	2.90395	0.00368491	0.0157354
WBGene00001778		16.3925	26.8951	19.7133	30.4345	7.55657	3.81866	5.97787	14.7159		15.6881	1.55141	0.478466	3.24246	0.00118502	0.00635203
WBGene00018120		1.92853	0	3.75492	0	0	1.90933	0	0		0.949098	1.54999	2.09248	0.740744	0.458849	NA
WBGene00077450		1.92853	0	2.81619	1.04947	0	0	1.99262	0		0.973352	1.54889	1.86136	0.832127	0.405337	NA
WBGene00021723		9.64267	4.13771	5.63238	6.2968	4.72285	0.954664	0.996312	2.10227		4.31071	1.54524	0.822163	1.87949	0.0601782	0.13514
WBGene00012926		8.6784	2.06886	11.2648	1.04947	0.944571	0	3.98525	3.15341		3.89309	1.53779	1.03083	1.4918	0.135753	0.248132
WBGene00013858		10.6069	3.10328	15.0197	5.24734	3.77828	1.90933	3.98525	2.10227		5.71905	1.53536	0.752114	2.04139	0.0412122	0.102167
WBGene00022076		332.672	378.601	348.269	75.5616	88.7897	112.65	111.587	78.8353		190.871	1.53452	0.364626	4.20849	2.57083e-05	0.000263929
WBGene00003464		26.0352	10.3443	35.6718	16.7915	5.66743	3.81866	8.96681	12.6136		14.9887	1.5315	0.529489	2.89241	0.003823	0.0161891
WBGene00044212		379.921	219.299	524.75	216.19	103.903	98.3304	193.285	68.3239		225.5	1.53111	0.333392	4.59253	4.37908e-06	5.80586e-05
WBGene00014672		56.8918	84.8231	74.1597	66.1164	26.448	18.1386	29.8894	23.125		47.449	1.53064	0.271325	5.64136	1.68712e-08	4.69135e-07
WBGene00016953		73.2843	41.3771	63.8337	69.2648	15.1131	21.0026	29.8894	19.9716		41.7171	1.53	0.309171	4.94871	7.47088e-07	1.30178e-05
WBGene00012642		1.92853	5.17214	5.63238	7.34627	0.944571	0.954664	2.98894	2.10227		3.38372	1.52925	0.910384	1.67978	0.093	NA
WBGene00007875		4001.71	4765.61	4213.02	5578.97	1707.78	2359.93	1158.71	1248.75		3129.31	1.51894	0.214156	7.09267	1.31549e-12	9.34059e-11
WBGene00020640		12.5355	0	8.44858	4.19787	2.83371	2.86399	0	3.15341		4.25413	1.51491	1.02286	1.48106	0.138591	0.251813
WBGene00044349		29.8923	21.723	38.488	32.5335	15.1131	10.5013	10.9594	6.30682		20.6897	1.51022	0.393743	3.83554	0.000125287	0.000994091
WBGene00007633		6.74987	4.13771	5.63238	0	2.83371	0.954664	1.99262	0		2.78762	1.50773	1.12777	1.33692	0.181249	NA
WBGene00022700		12.5355	8.27542	5.63238	9.4452	5.66743	4.77332	1.99262	0		6.04023	1.50687	0.737439	2.04339	0.041014	0.101742
WBGene00005505		0	0	0	2.09893	0	0	0	0		0.262367	1.50427	3.52824	0.426352	0.669852	NA
WBGene00006129		0	2.06886	0	0	0	0	0	0		0.258607	1.50427	3.52824	0.426352	0.669852	NA
WBGene00007822		0	2.06886	0	0	0	0	0	0		0.258607	1.50427	3.52824	0.426352	0.669852	NA
WBGene00011584		0	2.06886	0	0	0	0	0	0		0.258607	1.50427	3.52824	0.426352	0.669852	NA
WBGene00013773		0	2.06886	0	0	0	0	0	0		0.258607	1.50427	3.52824	0.426352	0.669852	NA
WBGene00014686		0	2.06886	0	0	0	0	0	0		0.258607	1.50427	3.52824	0.426352	0.669852	NA
WBGene00016668		0	2.06886	0	0	0	0	0	0		0.258607	1.50427	3.52824	0.426352	0.669852	NA
WBGene00021577		0	2.06886	0	0	0	0	0	0		0.258607	1.50427	3.52824	0.426352	0.669852	NA
WBGene00022973		0	0	0	2.09893	0	0	0	0		0.262367	1.50427	3.52824	0.426352	0.669852	NA
WBGene00044369		0	0	0	2.09893	0	0	0	0		0.262367	1.50427	3.52824	0.426352	0.669852	NA
WBGene00044895		0	2.06886	0	0	0	0	0	0		0.258607	1.50427	3.52824	0.426352	0.669852	NA
WBGene00046437		0	0	0	2.09893	0	0	0	0		0.262367	1.50427	3.52824	0.426352	0.669852	NA
WBGene00048369		0	0	0	2.09893	0	0	0	0		0.262367	1.50427	3.52824	0.426352	0.669852	NA
WBGene00050641		0	2.06886	0	0	0	0	0	0		0.258607	1.50427	3.52824	0.426352	0.669852	NA
WBGene00077755		0	0	0	2.09893	0	0	0	0		0.262367	1.50427	3.52824	0.426352	0.669852	NA
WBGene00174946		0	0	0	2.09893	0	0	0	0		0.262367	1.50427	3.52824	0.426352	0.669852	NA
WBGene00196079		0	2.06886	0	0	0	0	0	0		0.258607	1.50427	3.52824	0.426352	0.669852	NA
WBGene00196266		0	0	0	2.09893	0	0	0	0		0.262367	1.50427	3.52824	0.426352	0.669852	NA
WBGene00198414		0	2.06886	0	0	0	0	0	0		0.258607	1.50427	3.52824	0.426352	0.669852	NA
WBGene00198992		0	2.06886	0	0	0	0	0	0		0.258607	1.50427	3.52824	0.426352	0.669852	NA
WBGene00199613		0	2.06886	0	0	0	0	0	0		0.258607	1.50427	3.52824	0.426352	0.669852	NA
WBGene00200485		0	2.06886	0	0	0	0	0	0		0.258607	1.50427	3.52824	0.426352	0.669852	NA
WBGene00200912		0	2.06886	0	0	0	0	0	0		0.258607	1.50427	3.52824	0.426352	0.669852	NA
WBGene00201075		0	0	0	2.09893	0	0	0	0		0.262367	1.50427	3.52824	0.426352	0.669852	NA
WBGene00201125		0	0	0	2.09893	0	0	0	0		0.262367	1.50427	3.52824	0.426352	0.669852	NA
WBGene00202464		0	2.06886	0	0	0	0	0	0		0.258607	1.50427	3.52824	0.426352	0.669852	NA
WBGene00206368		0	2.06886	0	0	0	0	0	0		0.258607	1.50427	3.52824	0.426352	0.669852	NA
WBGene00219588		0	2.06886	0	0	0	0	0	0		0.258607	1.50427	3.52824	0.426352	0.669852	NA
WBGene00020388		6.74987	4.13771	12.2035	7.34627	2.83371	3.81866	2.98894	1.05114		5.14122	1.50412	0.743518	2.02297	0.0430758	0.105553
WBGene00001529		0	1.03443	0	1.04947	0	0	0	0		0.260487	1.50329	3.42377	0.439075	0.660607	NA
WBGene00004812		0	1.03443	0	1.04947	0	0	0	0		0.260487	1.50329	3.42377	0.439075	0.660607	NA
WBGene00005328		0	1.03443	0	1.04947	0	0	0	0		0.260487	1.50329	3.42377	0.439075	0.660607	NA
WBGene00005529		0	1.03443	0	1.04947	0	0	0	0		0.260487	1.50329	3.42377	0.439075	0.660607	NA
WBGene00005730		0	1.03443	0	1.04947	0	0	0	0		0.260487	1.50329	3.42377	0.439075	0.660607	NA
WBGene00005961		0	1.03443	0	1.04947	0	0	0	0		0.260487	1.50329	3.42377	0.439075	0.660607	NA
WBGene00010025		0	1.03443	0	1.04947	0	0	0	0		0.260487	1.50329	3.42377	0.439075	0.660607	NA
WBGene00017185		0	1.03443	0	1.04947	0	0	0	0		0.260487	1.50329	3.42377	0.439075	0.660607	NA
WBGene00017609		0	1.03443	0	1.04947	0	0	0	0		0.260487	1.50329	3.42377	0.439075	0.660607	NA
WBGene00019903		0	1.03443	0	1.04947	0	0	0	0		0.260487	1.50329	3.42377	0.439075	0.660607	NA
WBGene00020129		0	1.03443	0	1.04947	0	0	0	0		0.260487	1.50329	3.42377	0.439075	0.660607	NA
WBGene00021291		0	1.03443	0	1.04947	0	0	0	0		0.260487	1.50329	3.42377	0.439075	0.660607	NA
WBGene00021995		0	1.03443	0	1.04947	0	0	0	0		0.260487	1.50329	3.42377	0.439075	0.660607	NA
WBGene00023106		0	1.03443	0	1.04947	0	0	0	0		0.260487	1.50329	3.42377	0.439075	0.660607	NA
WBGene00172654		0	1.03443	0	1.04947	0	0	0	0		0.260487	1.50329	3.42377	0.439075	0.660607	NA
WBGene00194844		0	1.03443	0	1.04947	0	0	0	0		0.260487	1.50329	3.42377	0.439075	0.660607	NA
WBGene00195410		0	1.03443	0	1.04947	0	0	0	0		0.260487	1.50329	3.42377	0.439075	0.660607	NA
WBGene00199368		0	1.03443	0	1.04947	0	0	0	0		0.260487	1.50329	3.42377	0.439075	0.660607	NA
WBGene00199374		0	1.03443	0	1.04947	0	0	0	0		0.260487	1.50329	3.42377	0.439075	0.660607	NA
WBGene00206481		0	1.03443	0	1.04947	0	0	0	0		0.260487	1.50329	3.42377	0.439075	0.660607	NA
WBGene00194848		6.74987	4.13771	6.57111	10.4947	1.88914	2.86399	2.98894	2.10227		4.72471	1.50322	0.75058	2.00274	0.0452054	0.109142
WBGene00016875		118.605	123.097	80.7308	252.922	42.5057	47.7332	27.8967	85.1421		97.329	1.50212	0.374276	4.01341	5.98481e-05	0.000539021
WBGene00003434		22.1781	10.3443	25.3457	9.4452	3.77828	4.77332	3.98525	11.5625		11.4266	1.50061	0.5768	2.60161	0.00927863	0.0324322
WBGene00021337		28.928	19.6541	38.488	17.8409	10.3903	6.68265	12.9521	7.35796		17.7867	1.49296	0.438554	3.40428	0.000663387	0.00390562
WBGene00022237		30.8565	49.6525	17.8359	40.9292	11.3349	7.63731	15.941	14.7159		23.6129	1.48909	0.417356	3.56791	0.000359839	0.00240829
WBGene00014240		2.8928	3.10328	5.63238	2.09893	0.944571	1.90933	0.996312	1.05114		2.32859	1.48899	1.04552	1.42416	0.1544	NA
WBGene00016895		3.85707	3.10328	1.87746	2.09893	1.88914	0.954664	0.996312	0		1.84711	1.4875	1.18233	1.2581	0.208355	NA
WBGene00219287		4.82134	2.06886	4.69365	2.09893	0.944571	1.90933	0.996312	1.05114		2.32302	1.48603	1.04968	1.4157	0.156864	NA
WBGene00219689		4.82134	3.10328	4.69365	1.04947	0.944571	0.954664	2.98894	0		2.31949	1.48538	1.11859	1.3279	0.18421	NA
WBGene00021885		119.569	76.5477	106.077	26.2367	34.9491	36.2772	21.9189	24.1762		55.7189	1.48508	0.398511	3.72657	0.000194106	0.00143916
WBGene00022030		4.82134	2.06886	0.938731	3.1484	0	2.86399	0	1.05114		1.86156	1.48143	1.29284	1.14587	0.251848	NA
WBGene00020881		0.964267	2.06886	4.69365	3.1484	0.944571	1.90933	0.996312	0		1.84067	1.48117	1.2166	1.21747	0.223426	NA
WBGene00013297		2635.34	2669.86	2728.89	2903.88	876.562	948.936	1119.85	979.66		1857.87	1.47875	0.108596	13.617	3.1755e-42	2.55143e-39
WBGene00004052		182.246	84.8231	133.3	11.5441	41.5611	43.9145	31.882	30.483		69.9693	1.47853	0.70944	2.08408	0.0371533	0.0941538
WBGene00022490		573.739	396.186	676.825	434.479	169.078	206.207	206.237	166.08		353.604	1.4776	0.192819	7.66312	1.8147e-14	1.73145e-12
WBGene00010959		12076.5	14181	11774.5	12103.5	4264.74	4265.44	4705.58	4797.39		8521.08	1.47522	0.103674	14.2295	6.01074e-46	7.64666e-43
WBGene00009016		3.85707	0	5.63238	4.19787	0	2.86399	0	2.10227		2.3317	1.47347	1.2789	1.15214	0.249264	NA
WBGene00021907		4.82134	2.06886	3.75492	3.1484	0	1.90933	0	3.15341		2.35703	1.47169	1.12914	1.30337	0.192449	NA
WBGene00011052		41.4635	22.7574	29.1006	14.6925	12.2794	13.3653	7.9705	5.25568		18.3606	1.47003	0.459815	3.19701	0.00138861	0.00718835
WBGene00017706		0	3.10328	5.63238	2.09893	0.944571	1.90933	0	1.05114		1.84245	1.46951	1.31493	1.11756	0.263756	NA
WBGene00017705		12.5355	6.20657	8.44858	6.2968	1.88914	0	0.996312	9.46023		5.72914	1.46792	0.857566	1.71173	0.0869465	0.178877
WBGene00005075		0.964267	1.03443	0	0	0	0	0	0		0.249837	1.46543	3.46779	0.422582	0.6726	NA
WBGene00005578		0.964267	1.03443	0	0	0	0	0	0		0.249837	1.46543	3.46779	0.422582	0.6726	NA
WBGene00006134		0.964267	1.03443	0	0	0	0	0	0		0.249837	1.46543	3.46779	0.422582	0.6726	NA
WBGene00006182		0.964267	1.03443	0	0	0	0	0	0		0.249837	1.46543	3.46779	0.422582	0.6726	NA
WBGene00007148		0.964267	1.03443	0	0	0	0	0	0		0.249837	1.46543	3.46779	0.422582	0.6726	NA
WBGene00008619		0.964267	1.03443	0	0	0	0	0	0		0.249837	1.46543	3.46779	0.422582	0.6726	NA
WBGene00008650		0.964267	1.03443	0	0	0	0	0	0		0.249837	1.46543	3.46779	0.422582	0.6726	NA
WBGene00017935		0.964267	1.03443	0	0	0	0	0	0		0.249837	1.46543	3.46779	0.422582	0.6726	NA
WBGene00020342		0.964267	1.03443	0	0	0	0	0	0		0.249837	1.46543	3.46779	0.422582	0.6726	NA
WBGene00044226		0.964267	1.03443	0	0	0	0	0	0		0.249837	1.46543	3.46779	0.422582	0.6726	NA
WBGene00044729		0.964267	1.03443	0	0	0	0	0	0		0.249837	1.46543	3.46779	0.422582	0.6726	NA
WBGene00044972		0.964267	1.03443	0	0	0	0	0	0		0.249837	1.46543	3.46779	0.422582	0.6726	NA
WBGene00050976		0.964267	1.03443	0	0	0	0	0	0		0.249837	1.46543	3.46779	0.422582	0.6726	NA
WBGene00169528		0.964267	1.03443	0	0	0	0	0	0		0.249837	1.46543	3.46779	0.422582	0.6726	NA
WBGene00170022		0.964267	1.03443	0	0	0	0	0	0		0.249837	1.46543	3.46779	0.422582	0.6726	NA
WBGene00197316		0.964267	1.03443	0	0	0	0	0	0		0.249837	1.46543	3.46779	0.422582	0.6726	NA
WBGene00197339		0.964267	1.03443	0	0	0	0	0	0		0.249837	1.46543	3.46779	0.422582	0.6726	NA
WBGene00197682		0.964267	1.03443	0	0	0	0	0	0		0.249837	1.46543	3.46779	0.422582	0.6726	NA
WBGene00198201		0.964267	1.03443	0	0	0	0	0	0		0.249837	1.46543	3.46779	0.422582	0.6726	NA
WBGene00220068		0.964267	1.03443	0	0	0	0	0	0		0.249837	1.46543	3.46779	0.422582	0.6726	NA
WBGene00235111		0.964267	1.03443	0	0	0	0	0	0		0.249837	1.46543	3.46779	0.422582	0.6726	NA
WBGene00003665		0.964267	0	0	1.04947	0	0	0	0		0.251717	1.46542	3.45894	0.423661	0.671813	NA
WBGene00005049		0.964267	0	0	1.04947	0	0	0	0		0.251717	1.46542	3.45894	0.423661	0.671813	NA
WBGene00005452		0.964267	0	0	1.04947	0	0	0	0		0.251717	1.46542	3.45894	0.423661	0.671813	NA
WBGene00007206		0.964267	0	0	1.04947	0	0	0	0		0.251717	1.46542	3.45894	0.423661	0.671813	NA
WBGene00010162		0.964267	0	0	1.04947	0	0	0	0		0.251717	1.46542	3.45894	0.423661	0.671813	NA
WBGene00011183		0.964267	0	0	1.04947	0	0	0	0		0.251717	1.46542	3.45894	0.423661	0.671813	NA
WBGene00012283		0.964267	0	0	1.04947	0	0	0	0		0.251717	1.46542	3.45894	0.423661	0.671813	NA
WBGene00012302		0.964267	0	0	1.04947	0	0	0	0		0.251717	1.46542	3.45894	0.423661	0.671813	NA
WBGene00013624		0.964267	0	0	1.04947	0	0	0	0		0.251717	1.46542	3.45894	0.423661	0.671813	NA
WBGene00018650		0.964267	0	0	1.04947	0	0	0	0		0.251717	1.46542	3.45894	0.423661	0.671813	NA
WBGene00022496		0.964267	0	0	1.04947	0	0	0	0		0.251717	1.46542	3.45894	0.423661	0.671813	NA
WBGene00077619		0.964267	0	0	1.04947	0	0	0	0		0.251717	1.46542	3.45894	0.423661	0.671813	NA
WBGene00166274		0.964267	0	0	1.04947	0	0	0	0		0.251717	1.46542	3.45894	0.423661	0.671813	NA
WBGene00167897		0.964267	0	0	1.04947	0	0	0	0		0.251717	1.46542	3.45894	0.423661	0.671813	NA
WBGene00172863		0.964267	0	0	1.04947	0	0	0	0		0.251717	1.46542	3.45894	0.423661	0.671813	NA
WBGene00195010		0.964267	0	0	1.04947	0	0	0	0		0.251717	1.46542	3.45894	0.423661	0.671813	NA
WBGene00195822		0.964267	0	0	1.04947	0	0	0	0		0.251717	1.46542	3.45894	0.423661	0.671813	NA
WBGene00197718		0.964267	0	0	1.04947	0	0	0	0		0.251717	1.46542	3.45894	0.423661	0.671813	NA
WBGene00198640		0.964267	0	0	1.04947	0	0	0	0		0.251717	1.46542	3.45894	0.423661	0.671813	NA
WBGene00200237		0.964267	0	0	1.04947	0	0	0	0		0.251717	1.46542	3.45894	0.423661	0.671813	NA
WBGene00200253		0.964267	0	0	1.04947	0	0	0	0		0.251717	1.46542	3.45894	0.423661	0.671813	NA
WBGene00200667		0.964267	0	0	1.04947	0	0	0	0		0.251717	1.46542	3.45894	0.423661	0.671813	NA
WBGene00200848		0.964267	0	0	1.04947	0	0	0	0		0.251717	1.46542	3.45894	0.423661	0.671813	NA
WBGene00201615		0.964267	0	0	1.04947	0	0	0	0		0.251717	1.46542	3.45894	0.423661	0.671813	NA
WBGene00006719		1.92853	2.06886	0	4.19787	0.944571	0	1.99262	0		1.39156	1.46433	1.5291	0.957642	0.338243	NA
WBGene00006044		8.6784	2.06886	8.44858	8.39574	0.944571	0.954664	1.99262	6.30682		4.72378	1.46366	0.847444	1.72715	0.0841415	0.174781
WBGene00002262		3157.97	3202.59	2669.75	3870.43	1228.89	1247.75	1045.13	1155.2		2197.21	1.46357	0.135191	10.8259	2.59436e-27	8.60991e-25
WBGene00021193		74.2486	110.684	110.77	96.551	38.7274	30.5492	25.9041	47.3012		66.8419	1.4634	0.255029	5.73817	9.5706e-09	2.85919e-07
WBGene00021853		284.459	346.533	291.006	374.66	75.5657	108.832	118.561	168.182		220.975	1.46282	0.221834	6.59419	4.27583e-11	2.20523e-09
WBGene00018792		5.7856	6.20657	2.81619	4.19787	2.83371	0	2.98894	1.05114		3.235	1.46222	0.939579	1.55625	0.119648	NA
WBGene00015012		48.2134	48.6181	28.1619	44.0776	12.2794	16.2293	10.9594	22.0739		28.8266	1.46132	0.349997	4.17524	2.97675e-05	0.000297402
WBGene00020860		9.64267	7.24099	13.1422	10.4947	5.66743	1.90933	3.98525	3.15341		6.9045	1.461	0.628152	2.32587	0.0200255	0.0586549
WBGene00012172		1.92853	2.06886	5.63238	1.04947	2.83371	0	0	1.05114		1.82051	1.45837	1.3142	1.1097	0.267128	NA
WBGene00021189		3.85707	2.06886	2.81619	2.09893	0.944571	0	1.99262	1.05114		1.85367	1.45795	1.18052	1.23501	0.216826	NA
WBGene00012809		15.4283	12.4131	16.8972	4.19787	2.83371	1.90933	6.97418	6.30682		8.37006	1.45785	0.646181	2.2561	0.0240641	0.0676293
WBGene00018477		1.92853	1.03443	1.87746	3.1484	1.88914	0.954664	0	0		1.35408	1.45587	1.41236	1.03081	0.302629	NA
WBGene00009988		50.1419	48.6181	55.3851	29.3851	12.2794	20.0479	16.9373	17.8693		31.333	1.45538	0.331485	4.39047	1.13108e-05	0.000132011
WBGene00015890		2.8928	3.10328	3.75492	1.04947	1.88914	0	0	2.10227		1.84899	1.45262	1.24989	1.1622	0.245153	NA
WBGene00006280		0	0	0.938731	1.04947	0	0	0	0		0.248525	1.44965	3.47242	0.417474	0.676332	NA
WBGene00008703		0	0	0.938731	1.04947	0	0	0	0		0.248525	1.44965	3.47242	0.417474	0.676332	NA
WBGene00009411		0	0	0.938731	1.04947	0	0	0	0		0.248525	1.44965	3.47242	0.417474	0.676332	NA
WBGene00009704		0	0	0.938731	1.04947	0	0	0	0		0.248525	1.44965	3.47242	0.417474	0.676332	NA
WBGene00011516		0	0	0.938731	1.04947	0	0	0	0		0.248525	1.44965	3.47242	0.417474	0.676332	NA
WBGene00014170		0	0	0.938731	1.04947	0	0	0	0		0.248525	1.44965	3.47242	0.417474	0.676332	NA
WBGene00016183		0	0	0.938731	1.04947	0	0	0	0		0.248525	1.44965	3.47242	0.417474	0.676332	NA
WBGene00017152		0	0	0.938731	1.04947	0	0	0	0		0.248525	1.44965	3.47242	0.417474	0.676332	NA
WBGene00018549		0	0	0.938731	1.04947	0	0	0	0		0.248525	1.44965	3.47242	0.417474	0.676332	NA
WBGene00018617		0	0	0.938731	1.04947	0	0	0	0		0.248525	1.44965	3.47242	0.417474	0.676332	NA
WBGene00019954		0	0	0.938731	1.04947	0	0	0	0		0.248525	1.44965	3.47242	0.417474	0.676332	NA
WBGene00020428		0	0	0.938731	1.04947	0	0	0	0		0.248525	1.44965	3.47242	0.417474	0.676332	NA
WBGene00020535		0	0	0.938731	1.04947	0	0	0	0		0.248525	1.44965	3.47242	0.417474	0.676332	NA
WBGene00021308		0	0	0.938731	1.04947	0	0	0	0		0.248525	1.44965	3.47242	0.417474	0.676332	NA
WBGene00023397		0	0	0.938731	1.04947	0	0	0	0		0.248525	1.44965	3.47242	0.417474	0.676332	NA
WBGene00044003		0	0	0.938731	1.04947	0	0	0	0		0.248525	1.44965	3.47242	0.417474	0.676332	NA
WBGene00044948		0	0	0.938731	1.04947	0	0	0	0		0.248525	1.44965	3.47242	0.417474	0.676332	NA
WBGene00048054		0	0	0.938731	1.04947	0	0	0	0		0.248525	1.44965	3.47242	0.417474	0.676332	NA
WBGene00049049		0	0	0.938731	1.04947	0	0	0	0		0.248525	1.44965	3.47242	0.417474	0.676332	NA
WBGene00049596		0	0	0.938731	1.04947	0	0	0	0		0.248525	1.44965	3.47242	0.417474	0.676332	NA
WBGene00050879		0	0	0.938731	1.04947	0	0	0	0		0.248525	1.44965	3.47242	0.417474	0.676332	NA
WBGene00077445		0	0	0.938731	1.04947	0	0	0	0		0.248525	1.44965	3.47242	0.417474	0.676332	NA
WBGene00077583		0	0	0.938731	1.04947	0	0	0	0		0.248525	1.44965	3.47242	0.417474	0.676332	NA
WBGene00077666		0	0	0.938731	1.04947	0	0	0	0		0.248525	1.44965	3.47242	0.417474	0.676332	NA
WBGene00077682		0	0	0.938731	1.04947	0	0	0	0		0.248525	1.44965	3.47242	0.417474	0.676332	NA
WBGene00194711		0	0	0.938731	1.04947	0	0	0	0		0.248525	1.44965	3.47242	0.417474	0.676332	NA
WBGene00194744		0	0	0.938731	1.04947	0	0	0	0		0.248525	1.44965	3.47242	0.417474	0.676332	NA
WBGene00195278		0	0	0.938731	1.04947	0	0	0	0		0.248525	1.44965	3.47242	0.417474	0.676332	NA
WBGene00197625		0	0	0.938731	1.04947	0	0	0	0		0.248525	1.44965	3.47242	0.417474	0.676332	NA
WBGene00198430		0	0	0.938731	1.04947	0	0	0	0		0.248525	1.44965	3.47242	0.417474	0.676332	NA
WBGene00198457		0	0	0.938731	1.04947	0	0	0	0		0.248525	1.44965	3.47242	0.417474	0.676332	NA
WBGene00199843		0	0	0.938731	1.04947	0	0	0	0		0.248525	1.44965	3.47242	0.417474	0.676332	NA
WBGene00200971		0	0	0.938731	1.04947	0	0	0	0		0.248525	1.44965	3.47242	0.417474	0.676332	NA
WBGene00201435		0	0	0.938731	1.04947	0	0	0	0		0.248525	1.44965	3.47242	0.417474	0.676332	NA
WBGene00005072		0	1.03443	0.938731	0	0	0	0	0		0.246645	1.44964	3.48144	0.416391	0.677124	NA
WBGene00005912		0	1.03443	0.938731	0	0	0	0	0		0.246645	1.44964	3.48144	0.416391	0.677124	NA
WBGene00006186		0	1.03443	0.938731	0	0	0	0	0		0.246645	1.44964	3.48144	0.416391	0.677124	NA
WBGene00007078		0	1.03443	0.938731	0	0	0	0	0		0.246645	1.44964	3.48144	0.416391	0.677124	NA
WBGene00009568		0	1.03443	0.938731	0	0	0	0	0		0.246645	1.44964	3.48144	0.416391	0.677124	NA
WBGene00009604		0	1.03443	0.938731	0	0	0	0	0		0.246645	1.44964	3.48144	0.416391	0.677124	NA
WBGene00010929		0	1.03443	0.938731	0	0	0	0	0		0.246645	1.44964	3.48144	0.416391	0.677124	NA
WBGene00012061		0	1.03443	0.938731	0	0	0	0	0		0.246645	1.44964	3.48144	0.416391	0.677124	NA
WBGene00012093		0	1.03443	0.938731	0	0	0	0	0		0.246645	1.44964	3.48144	0.416391	0.677124	NA
WBGene00014861		0	1.03443	0.938731	0	0	0	0	0		0.246645	1.44964	3.48144	0.416391	0.677124	NA
WBGene00015534		0	1.03443	0.938731	0	0	0	0	0		0.246645	1.44964	3.48144	0.416391	0.677124	NA
WBGene00015826		0	1.03443	0.938731	0	0	0	0	0		0.246645	1.44964	3.48144	0.416391	0.677124	NA
WBGene00021187		0	1.03443	0.938731	0	0	0	0	0		0.246645	1.44964	3.48144	0.416391	0.677124	NA
WBGene00043466		0	1.03443	0.938731	0	0	0	0	0		0.246645	1.44964	3.48144	0.416391	0.677124	NA
WBGene00044141		0	1.03443	0.938731	0	0	0	0	0		0.246645	1.44964	3.48144	0.416391	0.677124	NA
WBGene00044416		0	1.03443	0.938731	0	0	0	0	0		0.246645	1.44964	3.48144	0.416391	0.677124	NA
WBGene00044664		0	1.03443	0.938731	0	0	0	0	0		0.246645	1.44964	3.48144	0.416391	0.677124	NA
WBGene00165235		0	1.03443	0.938731	0	0	0	0	0		0.246645	1.44964	3.48144	0.416391	0.677124	NA
WBGene00168899		0	1.03443	0.938731	0	0	0	0	0		0.246645	1.44964	3.48144	0.416391	0.677124	NA
WBGene00195021		0	1.03443	0.938731	0	0	0	0	0		0.246645	1.44964	3.48144	0.416391	0.677124	NA
WBGene00195363		0	1.03443	0.938731	0	0	0	0	0		0.246645	1.44964	3.48144	0.416391	0.677124	NA
WBGene00195641		0	1.03443	0.938731	0	0	0	0	0		0.246645	1.44964	3.48144	0.416391	0.677124	NA
WBGene00197661		0	1.03443	0.938731	0	0	0	0	0		0.246645	1.44964	3.48144	0.416391	0.677124	NA
WBGene00198641		0	1.03443	0.938731	0	0	0	0	0		0.246645	1.44964	3.48144	0.416391	0.677124	NA
WBGene00199262		0	1.03443	0.938731	0	0	0	0	0		0.246645	1.44964	3.48144	0.416391	0.677124	NA
WBGene00199638		0	1.03443	0.938731	0	0	0	0	0		0.246645	1.44964	3.48144	0.416391	0.677124	NA
WBGene00200889		0	1.03443	0.938731	0	0	0	0	0		0.246645	1.44964	3.48144	0.416391	0.677124	NA
WBGene00201654		0	1.03443	0.938731	0	0	0	0	0		0.246645	1.44964	3.48144	0.416391	0.677124	NA
WBGene00201915		0	1.03443	0.938731	0	0	0	0	0		0.246645	1.44964	3.48144	0.416391	0.677124	NA
WBGene00202212		0	1.03443	0.938731	0	0	0	0	0		0.246645	1.44964	3.48144	0.416391	0.677124	NA
WBGene00202478		0	1.03443	0.938731	0	0	0	0	0		0.246645	1.44964	3.48144	0.416391	0.677124	NA
WBGene00219215		0	1.03443	0.938731	0	0	0	0	0		0.246645	1.44964	3.48144	0.416391	0.677124	NA
WBGene00235294		0	1.03443	0.938731	0	0	0	0	0		0.246645	1.44964	3.48144	0.416391	0.677124	NA
WBGene00255522		0	1.03443	0.938731	0	0	0	0	0		0.246645	1.44964	3.48144	0.416391	0.677124	NA
WBGene00008088		1.92853	0	0	0	0	0	0	0		0.241067	1.44939	3.53091	0.410485	0.68145	NA
WBGene00013045		1.92853	0	0	0	0	0	0	0		0.241067	1.44939	3.53091	0.410485	0.68145	NA
WBGene00016000		1.92853	0	0	0	0	0	0	0		0.241067	1.44939	3.53091	0.410485	0.68145	NA
WBGene00016873		1.92853	0	0	0	0	0	0	0		0.241067	1.44939	3.53091	0.410485	0.68145	NA
WBGene00018179		1.92853	0	0	0	0	0	0	0		0.241067	1.44939	3.53091	0.410485	0.68145	NA
WBGene00018494		1.92853	0	0	0	0	0	0	0		0.241067	1.44939	3.53091	0.410485	0.68145	NA
WBGene00022207		1.92853	0	0	0	0	0	0	0		0.241067	1.44939	3.53091	0.410485	0.68145	NA
WBGene00023385		1.92853	0	0	0	0	0	0	0		0.241067	1.44939	3.53091	0.410485	0.68145	NA
WBGene00047907		1.92853	0	0	0	0	0	0	0		0.241067	1.44939	3.53091	0.410485	0.68145	NA
WBGene00049887		1.92853	0	0	0	0	0	0	0		0.241067	1.44939	3.53091	0.410485	0.68145	NA
WBGene00050232		1.92853	0	0	0	0	0	0	0		0.241067	1.44939	3.53091	0.410485	0.68145	NA
WBGene00167050		1.92853	0	0	0	0	0	0	0		0.241067	1.44939	3.53091	0.410485	0.68145	NA
WBGene00168485		1.92853	0	0	0	0	0	0	0		0.241067	1.44939	3.53091	0.410485	0.68145	NA
WBGene00194729		1.92853	0	0	0	0	0	0	0		0.241067	1.44939	3.53091	0.410485	0.68145	NA
WBGene00196112		1.92853	0	0	0	0	0	0	0		0.241067	1.44939	3.53091	0.410485	0.68145	NA
WBGene00197363		1.92853	0	0	0	0	0	0	0		0.241067	1.44939	3.53091	0.410485	0.68145	NA
WBGene00197592		1.92853	0	0	0	0	0	0	0		0.241067	1.44939	3.53091	0.410485	0.68145	NA
WBGene00201667		1.92853	0	0	0	0	0	0	0		0.241067	1.44939	3.53091	0.410485	0.68145	NA
WBGene00219601		1.92853	0	0	0	0	0	0	0		0.241067	1.44939	3.53091	0.410485	0.68145	NA
WBGene00236808		0	0	0	8.39574	0	0	0.996312	2.10227		1.43679	1.44814	2.01009	0.720437	0.471256	NA
WBGene00023314		2.8928	7.24099	2.81619	3.1484	0	2.86399	2.98894	0		2.74391	1.44775	1.07973	1.34085	0.179971	NA
WBGene00007613		3.85707	3.10328	3.75492	5.24734	0.944571	2.86399	1.99262	0		2.72047	1.44283	0.992417	1.45386	0.145986	NA
WBGene00043743		6.74987	4.13771	9.38731	1.04947	0.944571	1.90933	2.98894	2.10227		3.65868	1.44138	0.910489	1.58309	0.113401	NA
WBGene00003535		0.964267	0	0.938731	0	0	0	0	0		0.237875	1.43813	3.52713	0.407734	0.683469	NA
WBGene00005521		0.964267	0	0.938731	0	0	0	0	0		0.237875	1.43813	3.52713	0.407734	0.683469	NA
WBGene00005863		0.964267	0	0.938731	0	0	0	0	0		0.237875	1.43813	3.52713	0.407734	0.683469	NA
WBGene00008337		0.964267	0	0.938731	0	0	0	0	0		0.237875	1.43813	3.52713	0.407734	0.683469	NA
WBGene00009817		0.964267	0	0.938731	0	0	0	0	0		0.237875	1.43813	3.52713	0.407734	0.683469	NA
WBGene00011549		0.964267	0	0.938731	0	0	0	0	0		0.237875	1.43813	3.52713	0.407734	0.683469	NA
WBGene00014997		0.964267	0	0.938731	0	0	0	0	0		0.237875	1.43813	3.52713	0.407734	0.683469	NA
WBGene00015685		0.964267	0	0.938731	0	0	0	0	0		0.237875	1.43813	3.52713	0.407734	0.683469	NA
WBGene00016949		0.964267	0	0.938731	0	0	0	0	0		0.237875	1.43813	3.52713	0.407734	0.683469	NA
WBGene00017966		0.964267	0	0.938731	0	0	0	0	0		0.237875	1.43813	3.52713	0.407734	0.683469	NA
WBGene00018500		0.964267	0	0.938731	0	0	0	0	0		0.237875	1.43813	3.52713	0.407734	0.683469	NA
WBGene00020534		0.964267	0	0.938731	0	0	0	0	0		0.237875	1.43813	3.52713	0.407734	0.683469	NA
WBGene00044422		0.964267	0	0.938731	0	0	0	0	0		0.237875	1.43813	3.52713	0.407734	0.683469	NA
WBGene00045279		0.964267	0	0.938731	0	0	0	0	0		0.237875	1.43813	3.52713	0.407734	0.683469	NA
WBGene00047167		0.964267	0	0.938731	0	0	0	0	0		0.237875	1.43813	3.52713	0.407734	0.683469	NA
WBGene00048157		0.964267	0	0.938731	0	0	0	0	0		0.237875	1.43813	3.52713	0.407734	0.683469	NA
WBGene00049835		0.964267	0	0.938731	0	0	0	0	0		0.237875	1.43813	3.52713	0.407734	0.683469	NA
WBGene00169319		0.964267	0	0.938731	0	0	0	0	0		0.237875	1.43813	3.52713	0.407734	0.683469	NA
WBGene00196025		0.964267	0	0.938731	0	0	0	0	0		0.237875	1.43813	3.52713	0.407734	0.683469	NA
WBGene00196995		0.964267	0	0.938731	0	0	0	0	0		0.237875	1.43813	3.52713	0.407734	0.683469	NA
WBGene00198246		0.964267	0	0.938731	0	0	0	0	0		0.237875	1.43813	3.52713	0.407734	0.683469	NA
WBGene00199710		0.964267	0	0.938731	0	0	0	0	0		0.237875	1.43813	3.52713	0.407734	0.683469	NA
WBGene00201153		0.964267	0	0.938731	0	0	0	0	0		0.237875	1.43813	3.52713	0.407734	0.683469	NA
WBGene00202218		0.964267	0	0.938731	0	0	0	0	0		0.237875	1.43813	3.52713	0.407734	0.683469	NA
WBGene00219395		0.964267	0	0.938731	0	0	0	0	0		0.237875	1.43813	3.52713	0.407734	0.683469	NA
WBGene00219584		0.964267	0	0.938731	0	0	0	0	0		0.237875	1.43813	3.52713	0.407734	0.683469	NA
WBGene00014049		4.82134	0	4.69365	1.04947	0.944571	0.954664	0.996312	1.05114		1.81389	1.43695	1.28006	1.12256	0.261623	NA
WBGene00005271		53.0347	66.2034	74.1597	72.4132	27.3926	27.6853	24.9078	17.8693		45.4582	1.43658	0.26791	5.36217	8.22283e-08	1.90197e-06
WBGene00016767		73.2843	101.374	99.5054	73.4627	31.1708	39.1412	34.8709	23.125		59.4918	1.43481	0.254203	5.64435	1.65811e-08	4.62756e-07
WBGene00016753		3.85707	3.10328	3.75492	0	0	0.954664	0.996312	2.10227		1.84607	1.4328	1.28359	1.11625	0.264316	NA
WBGene00009728		7.71414	2.06886	1.87746	4.19787	0.944571	2.86399	0.996312	1.05114		2.71429	1.43156	1.01928	1.40448	0.160175	NA
WBGene00195169		22.1781	21.723	21.5908	11.5441	6.612	5.72798	7.9705	8.4091		13.2195	1.43108	0.464124	3.08339	0.00204654	0.00987123
WBGene00022298		9.64267	12.4131	16.8972	16.7915	5.66743	5.72798	2.98894	6.30682		9.55445	1.42973	0.536948	2.66269	0.00775178	0.0283446
WBGene00010920		10.6069	9.30985	19.7133	8.39574	2.83371	1.90933	5.97787	7.35796		8.26309	1.42938	0.622124	2.29758	0.0215856	0.0620342
WBGene00003352		0	0	1.87746	0	0	0	0	0		0.234683	1.42678	3.53203	0.403955	0.686246	NA
WBGene00005118		0	0	1.87746	0	0	0	0	0		0.234683	1.42678	3.53203	0.403955	0.686246	NA
WBGene00013951		0	0	1.87746	0	0	0	0	0		0.234683	1.42678	3.53203	0.403955	0.686246	NA
WBGene00014872		0	0	1.87746	0	0	0	0	0		0.234683	1.42678	3.53203	0.403955	0.686246	NA
WBGene00017725		0	0	1.87746	0	0	0	0	0		0.234683	1.42678	3.53203	0.403955	0.686246	NA
WBGene00018296		0	0	1.87746	0	0	0	0	0		0.234683	1.42678	3.53203	0.403955	0.686246	NA
WBGene00022341		0	0	1.87746	0	0	0	0	0		0.234683	1.42678	3.53203	0.403955	0.686246	NA
WBGene00043987		0	0	1.87746	0	0	0	0	0		0.234683	1.42678	3.53203	0.403955	0.686246	NA
WBGene00044356		0	0	1.87746	0	0	0	0	0		0.234683	1.42678	3.53203	0.403955	0.686246	NA
WBGene00047135		0	0	1.87746	0	0	0	0	0		0.234683	1.42678	3.53203	0.403955	0.686246	NA
WBGene00047674		0	0	1.87746	0	0	0	0	0		0.234683	1.42678	3.53203	0.403955	0.686246	NA
WBGene00165374		0	0	1.87746	0	0	0	0	0		0.234683	1.42678	3.53203	0.403955	0.686246	NA
WBGene00166258		0	0	1.87746	0	0	0	0	0		0.234683	1.42678	3.53203	0.403955	0.686246	NA
WBGene00170032		0	0	1.87746	0	0	0	0	0		0.234683	1.42678	3.53203	0.403955	0.686246	NA
WBGene00171454		0	0	1.87746	0	0	0	0	0		0.234683	1.42678	3.53203	0.403955	0.686246	NA
WBGene00195840		0	0	1.87746	0	0	0	0	0		0.234683	1.42678	3.53203	0.403955	0.686246	NA
WBGene00196307		0	0	1.87746	0	0	0	0	0		0.234683	1.42678	3.53203	0.403955	0.686246	NA
WBGene00196925		0	0	1.87746	0	0	0	0	0		0.234683	1.42678	3.53203	0.403955	0.686246	NA
WBGene00196937		0	0	1.87746	0	0	0	0	0		0.234683	1.42678	3.53203	0.403955	0.686246	NA
WBGene00198520		0	0	1.87746	0	0	0	0	0		0.234683	1.42678	3.53203	0.403955	0.686246	NA
WBGene00198565		0	0	1.87746	0	0	0	0	0		0.234683	1.42678	3.53203	0.403955	0.686246	NA
WBGene00199421		0	0	1.87746	0	0	0	0	0		0.234683	1.42678	3.53203	0.403955	0.686246	NA
WBGene00199485		0	0	1.87746	0	0	0	0	0		0.234683	1.42678	3.53203	0.403955	0.686246	NA
WBGene00220095		0	0	1.87746	0	0	0	0	0		0.234683	1.42678	3.53203	0.403955	0.686246	NA
WBGene00235153		0	0	1.87746	0	0	0	0	0		0.234683	1.42678	3.53203	0.403955	0.686246	NA
WBGene00235361		0	0	1.87746	0	0	0	0	0		0.234683	1.42678	3.53203	0.403955	0.686246	NA
WBGene00255563		0	0	1.87746	0	0	0	0	0		0.234683	1.42678	3.53203	0.403955	0.686246	NA
WBGene00009590		0.964267	2.06886	0.938731	4.19787	0	0	0.996312	2.10227		1.40854	1.42416	1.44173	0.987809	0.323246	NA
WBGene00005580		2.8928	2.06886	1.87746	1.04947	0	0.954664	1.99262	0		1.35448	1.42205	1.41027	1.00835	0.313286	NA
WBGene00013887		7.71414	1.03443	6.57111	3.1484	0.944571	1.90933	0.996312	3.15341		3.18396	1.42087	0.967689	1.46831	0.14202	NA
WBGene00017944		11.5712	16.5508	15.9584	16.7915	4.72285	3.81866	7.9705	6.30682		10.4613	1.41991	0.507424	2.79827	0.00513775	0.020404
WBGene00011414		1.92853	2.06886	2.81619	1.04947	0.944571	0.954664	0	1.05114		1.35168	1.41949	1.35126	1.05049	0.293492	NA
WBGene00008657		2.8928	1.03443	0.938731	3.1484	0	0.954664	0	2.10227		1.38391	1.41463	1.43097	0.988582	0.322867	NA
WBGene00016357		7.71414	8.27542	4.69365	3.1484	0.944571	1.90933	1.99262	4.20455		4.11034	1.41456	0.821676	1.72155	0.0851508	0.176355
WBGene00009021		4.82134	2.06886	3.75492	0	0	0	1.99262	2.10227		1.8425	1.41361	1.37859	1.0254	0.305175	NA
WBGene00189951		204.425	225.505	213.092	217.24	61.3971	85.9198	86.6792	89.3466		147.951	1.4136	0.170012	8.31473	9.19634e-17	1.19993e-14
WBGene00012840		16.3925	12.4131	21.5908	7.34627	3.77828	4.77332	4.98156	8.4091		9.96063	1.41173	0.559771	2.52198	0.0116695	0.0389239
WBGene00019730		2051.96	1443.03	1876.52	479.606	545.017	501.199	670.518	483.523		1006.42	1.41112	0.438189	3.22034	0.00128039	0.0067541
WBGene00012570		6.74987	2.06886	4.69365	2.09893	0.944571	2.86399	0	2.10227		2.69027	1.40998	1.0412	1.35418	0.175679	NA
WBGene00045270		12.5355	10.3443	9.38731	9.4452	4.72285	3.81866	4.98156	2.10227		7.1672	1.40993	0.600099	2.3495	0.0187986	0.0559689
WBGene00045416		473.455	483.078	486.262	461.766	192.692	212.89	153.432	157.671		327.656	1.4084	0.142368	9.8927	4.47801e-23	1.06815e-20
WBGene00010876		0	3.10328	4.69365	0	0.944571	0.954664	0	1.05114		1.34341	1.40839	1.60138	0.879487	0.379137	NA
WBGene00015694		6.74987	4.13771	3.75492	6.2968	2.83371	1.90933	0	3.15341		3.60447	1.40778	0.875803	1.60742	0.107963	NA
WBGene00010633		26.0352	17.5853	33.7943	16.7915	5.66743	5.72798	14.9447	9.46023		16.2508	1.40671	0.467212	3.01085	0.00260513	0.0119968
WBGene00009360		13.4997	8.27542	13.1422	4.19787	2.83371	3.81866	2.98894	5.25568		6.75153	1.40669	0.657516	2.1394	0.0324035	0.0846751
WBGene00017542		33.7494	11.3787	35.6718	15.742	4.72285	11.456	8.96681	11.5625		16.6562	1.40484	0.501015	2.80399	0.00504741	0.020129
WBGene00002260		10.6069	15.5164	9.38731	37.7808	8.50114	4.77332	6.97418	7.35796		12.6123	1.40243	0.568982	2.46481	0.0137086	0.0440145
WBGene00005968		3.85707	3.10328	2.81619	3.1484	0.944571	1.90933	1.99262	0		2.22143	1.40119	1.0699	1.30964	0.190318	NA
WBGene00018134		14.464	10.3443	15.9584	3.1484	4.72285	2.86399	5.97787	3.15341		7.57915	1.39941	0.657439	2.12857	0.0332895	0.086372
WBGene00006215		6.74987	9.30985	7.50984	5.24734	0.944571	2.86399	1.99262	5.25568		4.98422	1.39911	0.741733	1.88627	0.0592592	0.133662
WBGene00007306		1.92853	1.03443	2.81619	2.09893	0	0	0.996312	2.10227		1.37208	1.38983	1.40743	0.987497	0.323399	NA
WBGene00007701		9.64267	9.30985	6.57111	5.24734	5.66743	1.90933	1.99262	2.10227		5.30533	1.38941	0.719145	1.93203	0.0533553	0.123151
WBGene00017466		34.7136	26.8951	27.2232	1.04947	7.55657	8.59198	12.9521	5.25568		15.5297	1.38913	0.660581	2.10289	0.0354757	0.0908831
WBGene00009941		2.8928	2.06886	6.57111	1.04947	0.944571	3.81866	0	0		2.16818	1.38852	1.25369	1.10754	0.26806	NA
WBGene00013684		8.6784	5.17214	4.69365	2.09893	1.88914	0.954664	1.99262	3.15341		3.57912	1.38647	0.874898	1.58472	0.113029	NA
WBGene00012098		6.74987	4.13771	2.81619	4.19787	0.944571	2.86399	2.98894	0		3.08739	1.38552	0.954036	1.45227	0.146427	NA
WBGene00000684		1.92853	4.13771	8.44858	6.2968	1.88914	0	1.99262	4.20455		3.61224	1.38406	0.931919	1.48517	0.137499	NA
WBGene00010508		1.92853	1.03443	8.44858	1.04947	3.77828	0.954664	0	0		2.14924	1.38392	1.33268	1.03845	0.299063	NA
WBGene00017111		0	0	0	3.1484	0	0.954664	0	0		0.512883	1.38305	2.80888	0.492385	0.622447	NA
WBGene00048876		0	0	0	3.1484	0	0.954664	0	0		0.512883	1.38305	2.80888	0.492385	0.622447	NA
WBGene00022272		3.85707	3.10328	2.81619	8.39574	0.944571	0.954664	2.98894	2.10227		3.14534	1.38224	0.932019	1.48306	0.138058	NA
WBGene00007601		30.8565	16.5508	24.407	20.9893	10.3903	2.86399	8.96681	13.6648		16.0862	1.3814	0.466278	2.96261	0.00305039	0.0136064
WBGene00021627		0	4.13771	7.50984	1.04947	2.83371	0	0.996312	1.05114		2.19727	1.37955	1.30582	1.05646	0.290759	NA
WBGene00019613		0.964267	1.03443	0	3.1484	0.944571	0.954664	0	0		0.880791	1.37952	1.80607	0.763827	0.44497	NA
WBGene00007507		232.388	145.854	166.155	38.8303	52.896	60.1438	55.7935	55.7103		100.971	1.37825	0.383374	3.59504	0.000324336	0.00222003
WBGene00007913		274.816	286.536	251.58	335.829	129.406	116.469	90.6644	105.114		198.802	1.37672	0.16951	8.12178	4.59399e-16	5.52219e-14
WBGene00014985		72.32	80.6854	91.9956	57.7207	31.1708	30.5492	35.8672	18.9205		52.4037	1.37553	0.271877	5.05937	4.20653e-07	7.85047e-06
WBGene00018773		4.82134	7.24099	10.326	3.1484	1.88914	0.954664	4.98156	2.10227		4.43305	1.37436	0.81334	1.68977	0.0910719	0.185004
WBGene00022699		0.964267	3.10328	0	1.04947	0.944571	0.954664	0	0		0.877032	1.37375	1.80674	0.760349	0.447046	NA
WBGene00016687		0	1.03443	0	2.09893	0	0.954664	0	0		0.511003	1.37302	2.4396	0.562804	0.573568	NA
WBGene00044547		0	1.03443	0	2.09893	0	0.954664	0	0		0.511003	1.37302	2.4396	0.562804	0.573568	NA
WBGene00002063		303.744	406.53	282.558	393.55	126.573	121.242	143.469	144.006		240.209	1.37276	0.171815	7.98974	1.35228e-15	1.48518e-13
WBGene00006048		3.85707	3.10328	2.81619	3.1484	0.944571	0	0.996312	3.15341		2.2524	1.37162	1.08733	1.26146	0.207143	NA
WBGene00008340		8.6784	14.482	9.38731	10.4947	6.612	1.90933	6.97418	1.05114		7.44863	1.36787	0.647506	2.11252	0.0346422	0.0891666
WBGene00007199		0	2.06886	0	1.04947	0.944571	0	0	0		0.507862	1.3678	2.44318	0.559843	0.575586	NA
WBGene00017627		0	2.06886	0	1.04947	0	0.954664	0	0		0.509123	1.36778	2.44148	0.560224	0.575327	NA
WBGene00044086		0.964267	2.06886	0	2.09893	0.944571	0	0	1.05114		0.890971	1.36757	1.77523	0.770363	0.441084	NA
WBGene00219483		0	3.10328	0	0	0.944571	0	0	0		0.505982	1.36602	2.81864	0.484637	0.627934	NA
WBGene00044587		0	3.10328	0	0	0	0	0	1.05114		0.519303	1.36585	2.79593	0.488513	0.625187	NA
WBGene00013142		0.964267	3.10328	0	1.04947	0.944571	0	0.996312	0		0.882238	1.36529	1.80395	0.756829	0.449152	NA
WBGene00012155		6.74987	4.13771	4.69365	7.34627	1.88914	0.954664	3.98525	2.10227		3.98235	1.36517	0.809925	1.68555	0.0918818	0.186178
WBGene00006056		36.6422	12.4131	38.488	14.6925	8.50114	3.81866	10.9594	16.8182		17.7916	1.36375	0.530949	2.56851	0.0102136	0.0350147
WBGene00010967		1651.79	1688.19	1535.76	1559.51	586.579	565.161	602.769	747.358		1117.14	1.36367	0.12063	11.3046	1.24586e-29	5.14037e-27
WBGene00012772		1.92853	1.03443	0	2.09893	0.944571	0.954664	0	0		0.870141	1.36227	1.78168	0.764598	0.444511	NA
WBGene00001912		12.5355	21.723	17.8359	50.3744	6.612	11.456	3.98525	17.8693		17.7989	1.36169	0.554106	2.45745	0.0139926	0.0447073
WBGene00045322		0	3.10328	0	2.09893	0	0	0	2.10227		0.913061	1.36134	2.12481	0.640686	0.521726	NA
WBGene00194784		1.92853	2.06886	0	1.04947	0.944571	0.954664	0	0		0.868261	1.35942	1.782	0.762859	0.445547	NA
WBGene00021898		805.163	399.289	652.418	104.947	221.03	209.071	202.251	132.443		340.827	1.35908	0.582007	2.33515	0.0195353	0.0574839
WBGene00045402		1.92853	3.10328	0	0	0.944571	0.954664	0	0		0.866382	1.35885	1.94792	0.697591	0.485433	NA
WBGene00010181		1.92853	2.06886	0	1.04947	0	1.90933	0	0		0.869523	1.35842	1.91737	0.708483	0.478645	NA
WBGene00020139		1020.19	886.505	988.483	1051.57	434.503	298.81	317.824	489.83		685.964	1.35742	0.170407	7.96575	1.64219e-15	1.79069e-13
WBGene00011214		28.928	11.3787	21.5908	13.6431	10.3903	1.90933	8.96681	8.4091		13.152	1.35506	0.536904	2.52384	0.011608	0.0387677
WBGene00008660		3.85707	1.03443	6.57111	1.04947	0	1.90933	1.99262	1.05114		2.18315	1.3548	1.17534	1.15268	0.24904	NA
WBGene00000703		463.813	395.151	448.713	673.758	164.355	48.6879	252.067	310.085		344.579	1.35434	0.536124	2.52617	0.0115312	0.0386043
WBGene00021464		654.737	393.083	358.595	68.2154	131.295	193.797	137.491	114.574		256.473	1.35335	0.610264	2.21764	0.0265794	0.0729262
WBGene00008313		3.85707	3.10328	0	3.1484	1.88914	0	0.996312	1.05114		1.75567	1.35331	1.30641	1.0359	0.300248	NA
WBGene00200164		0.964267	2.06886	0.938731	1.04947	0.944571	0.954664	0	0		0.865069	1.35265	1.68372	0.80337	0.421761	NA
WBGene00005675		0.964267	2.06886	0.938731	1.04947	0	1.90933	0	0		0.866331	1.35144	1.78213	0.758325	0.448257	NA
WBGene00219227		0.964267	2.06886	0.938731	1.04947	0	1.90933	0	0		0.866331	1.35144	1.78213	0.758325	0.448257	NA
WBGene00009950		0.964267	4.13771	4.69365	5.24734	1.88914	1.90933	0.996312	1.05114		2.61111	1.35035	1.00467	1.34407	0.178927	NA
WBGene00011387		0.964267	0	0	2.09893	0.944571	0	0	0		0.500972	1.34794	2.45017	0.550143	0.582221	NA
WBGene00219719		0.964267	0	0	2.09893	0.944571	0	0	0		0.500972	1.34794	2.45017	0.550143	0.582221	NA
WBGene00015444		0.964267	0	0	2.09893	0	0.954664	0	0		0.502233	1.34793	2.44844	0.550527	0.581958	NA
WBGene00005793		0.964267	0	0	2.09893	0	0	0.996312	0		0.507439	1.34787	2.44134	0.552103	0.580878	NA
WBGene00017024		0.964267	0	0	2.09893	0	0	0.996312	0		0.507439	1.34787	2.44134	0.552103	0.580878	NA
WBGene00197405		0.964267	0	0	2.09893	0	0	0.996312	0		0.507439	1.34787	2.44134	0.552103	0.580878	NA
WBGene00005335		0.964267	0	0	2.09893	0	0	0	1.05114		0.514292	1.3478	2.43217	0.554155	0.579473	NA
WBGene00018182		0.964267	0	0	2.09893	0	0	0	1.05114		0.514292	1.3478	2.43217	0.554155	0.579473	NA
WBGene00015305		0.964267	1.03443	0.938731	2.09893	0.944571	0	0	1.05114		0.879008	1.34779	1.67925	0.802613	0.422199	NA
WBGene00019586		24.1067	16.5508	15.0197	6.2968	9.44571	5.72798	6.97418	2.10227		10.778	1.34769	0.579863	2.32416	0.0201171	0.0588668
WBGene00021865		22.1781	11.3787	18.7746	7.34627	4.72285	8.59198	5.97787	4.20455		10.3969	1.34693	0.554639	2.42848	0.0151623	0.0475684
WBGene00001399		35.6779	44.4804	30.0394	101.798	16.0577	37.2319	10.9594	18.9205		36.8957	1.34499	0.45882	2.93141	0.00337431	0.0146633
WBGene00021373		1.92853	1.03443	0.938731	1.04947	1.88914	0	0	0		0.855038	1.34342	1.78495	0.752635	0.451669	NA
WBGene00009344		19.2853	7.24099	19.7133	6.2968	4.72285	1.90933	7.9705	6.30682		9.18075	1.34337	0.630144	2.13184	0.03302	0.0858451
WBGene00020220		0.964267	4.13771	2.81619	2.09893	1.88914	0	0.996312	1.05114		1.74421	1.34326	1.2282	1.09368	0.274095	NA
WBGene00008110		4347.88	4789.4	4086.29	5189.61	2086.56	1970.43	1531.33	1668.15		3208.71	1.34315	0.136108	9.86828	5.71358e-23	1.3419e-20
WBGene00018345		16.3925	14.482	17.8359	3.1484	7.55657	5.72798	3.98525	3.15341		9.03525	1.34193	0.626686	2.14131	0.0322493	0.0843757
WBGene00022707		3.85707	2.06886	1.87746	2.09893	2.83371	0	0	1.05114		1.7234	1.34134	1.28247	1.0459	0.295606	NA
WBGene00001965		0.964267	1.03443	0	1.04947	0.944571	0	0	0		0.499092	1.34072	2.20175	0.608933	0.542569	NA
WBGene00006137		0.964267	1.03443	0	1.04947	0.944571	0	0	0		0.499092	1.34072	2.20175	0.608933	0.542569	NA
WBGene00014070		0.964267	1.03443	0	1.04947	0	0	0.996312	0		0.505559	1.34065	2.19489	0.610807	0.541327	NA
WBGene00021110		0.964267	1.03443	0	1.04947	0	0	0.996312	0		0.505559	1.34065	2.19489	0.610807	0.541327	NA
WBGene00198103		0.964267	1.03443	0	1.04947	0	0	0.996312	0		0.505559	1.34065	2.19489	0.610807	0.541327	NA
WBGene00012228		55.9275	56.8935	50.6915	58.7702	18.8914	24.8213	19.9262	24.1762		38.7622	1.34025	0.268876	4.98464	6.20776e-07	1.10969e-05
WBGene00219551		1.92853	1.03443	0.938731	1.04947	0.944571	0.954664	0	0		0.856299	1.33995	1.68498	0.795228	0.426481	NA
WBGene00008623		0	0	0.938731	2.09893	0.944571	0	0	0		0.497779	1.33851	2.45346	0.545561	0.585368	NA
WBGene00013154		0	0	0.938731	2.09893	0	0	0.996312	0		0.504247	1.33846	2.44455	0.547528	0.584016	NA
WBGene00044284		0	0	0.938731	2.09893	0	0	0.996312	0		0.504247	1.33846	2.44455	0.547528	0.584016	NA
WBGene00006257		0	0	0.938731	2.09893	0	0	0	1.05114		0.5111	1.33841	2.43529	0.549588	0.582602	NA
WBGene00018662		0.964267	1.03443	1.87746	1.04947	1.88914	0	0	0		0.851846	1.33825	1.7855	0.749508	0.453551	NA
WBGene00021006		0.964267	1.03443	1.87746	1.04947	1.88914	0	0	0		0.851846	1.33825	1.7855	0.749508	0.453551	NA
WBGene00017488		3.85707	3.10328	9.38731	1.04947	1.88914	0.954664	0.996312	3.15341		3.04883	1.33757	0.99212	1.34819	0.177597	NA
WBGene00005966		0.964267	2.06886	0	0	0.944571	0	0	0		0.497212	1.33731	2.45409	0.544931	0.585801	NA
WBGene00008474		0.964267	2.06886	0	0	0.944571	0	0	0		0.497212	1.33731	2.45409	0.544931	0.585801	NA
WBGene00010764		0.964267	2.06886	0	0	0.944571	0	0	0		0.497212	1.33731	2.45409	0.544931	0.585801	NA
WBGene00006106		0.964267	2.06886	0	0	0	0	0.996312	0		0.503679	1.33727	2.44517	0.546901	0.584447	NA
WBGene00007747		0.964267	2.06886	0	0	0	0	0.996312	0		0.503679	1.33727	2.44517	0.546901	0.584447	NA
WBGene00012133		0.964267	2.06886	0	0	0	0	0.996312	0		0.503679	1.33727	2.44517	0.546901	0.584447	NA
WBGene00016082		0.964267	2.06886	0	0	0	0	0.996312	0		0.503679	1.33727	2.44517	0.546901	0.584447	NA
WBGene00219660		6.74987	4.13771	4.69365	4.19787	1.88914	2.86399	1.99262	1.05114		3.447	1.33686	0.847067	1.57822	0.114514	NA
WBGene00022780		3.85707	1.03443	2.81619	2.09893	0.944571	1.90933	0.996312	0		1.7071	1.33654	1.22756	1.08877	0.276253	NA
WBGene00017707		9.64267	4.13771	4.69365	11.5441	3.77828	1.90933	0.996312	5.25568		5.24472	1.33524	0.758563	1.76023	0.0783691	0.165383
WBGene00022476		0.964267	1.03443	1.87746	1.04947	0.944571	0.954664	0	0		0.853107	1.33514	1.68544	0.792164	0.428265	NA
WBGene00007766		2894.73	3664.98	2626.57	4223.06	1121.21	1082.59	1257.35	1860.51		2341.37	1.33345	0.203946	6.53826	6.22384e-11	3.13575e-09
WBGene00007303		112.819	126.2	130.484	126.986	35.8937	42.9599	54.7972	64.1194		86.7823	1.33291	0.216824	6.14745	7.87395e-10	3.0202e-08
WBGene00009232		0	1.03443	0.938731	1.04947	0.944571	0	0	0		0.4959	1.33198	2.20429	0.604269	0.545665	NA
WBGene00009359		0	1.03443	0.938731	1.04947	0	0.954664	0	0		0.497161	1.33198	2.20293	0.604639	0.545419	NA
WBGene00011623		0	1.03443	0.938731	1.04947	0	0.954664	0	0		0.497161	1.33198	2.20293	0.604639	0.545419	NA
WBGene00015825		0	1.03443	0.938731	1.04947	0	0	0.996312	0		0.502367	1.33194	2.19737	0.606154	0.544413	NA
WBGene00044751		0	1.03443	0.938731	1.04947	0	0	0.996312	0		0.502367	1.33194	2.19737	0.606154	0.544413	NA
WBGene00015420		0	1.03443	0.938731	1.04947	0	0	0	1.05114		0.50922	1.3319	2.19018	0.608125	0.543105	NA
WBGene00194652		3.85707	4.13771	4.69365	2.09893	2.83371	0	1.99262	1.05114		2.58311	1.33097	1.01868	1.30656	0.191363	NA
WBGene00022670		0.964267	0	1.87746	2.09893	0.944571	0	0	1.05114		0.867046	1.33003	1.77909	0.747591	0.454707	NA
WBGene00014858		2.8928	3.10328	1.87746	2.09893	0.944571	0.954664	0	2.10227		1.74675	1.32967	1.19861	1.10935	0.267281	NA
WBGene00007291		0.964267	2.06886	1.87746	0	0	1.90933	0	0		0.852489	1.32946	1.92131	0.691955	0.488965	NA
WBGene00005283		1.92853	2.06886	0.938731	0	0.944571	0	0.996312	0		0.859625	1.32946	1.78157	0.746225	0.455532	NA
WBGene00021483		1.92853	1.03443	0.938731	1.04947	0	0.954664	0	1.05114		0.86962	1.32942	1.68054	0.791064	0.428907	NA
WBGene00206381		4.82134	2.06886	3.75492	4.19787	1.88914	0.954664	0.996312	2.10227		2.59817	1.32835	0.974387	1.36326	0.1728	NA
WBGene00199886		0	2.06886	0.938731	0	0	0.954664	0	0		0.495281	1.32782	2.45566	0.540719	0.588701	NA
WBGene00014597		0	2.06886	0.938731	0	0	0	0.996312	0		0.500487	1.3278	2.44842	0.542309	0.587605	NA
WBGene00044808		0	2.06886	0.938731	0	0	0	0	1.05114		0.50734	1.32778	2.43907	0.54438	0.58618	NA
WBGene00014996		0.964267	1.03443	1.87746	1.04947	0.944571	0	0.996312	0		0.858313	1.32769	1.68305	0.788863	0.430192	NA
WBGene00011964		440.67	497.56	467.488	400.896	202.138	214.799	163.395	138.75		315.712	1.32722	0.164838	8.05169	8.16561e-16	9.37265e-14
WBGene00194674		1397.22	1325.1	1427.81	1301.34	483.62	479.241	533.027	679.035		953.3	1.32667	0.135915	9.76099	1.65532e-22	3.77165e-20
WBGene00000551		0.964267	0	1.87746	2.09893	0	0.954664	0.996312	0		0.861455	1.32654	1.78113	0.744772	0.456409	NA
WBGene00010611		1.92853	3.10328	3.75492	1.04947	1.88914	0	0.996312	1.05114		1.7216	1.32617	1.22706	1.08078	0.279796	NA
WBGene00013409		18.3211	19.6541	22.5295	15.742	9.44571	7.63731	5.97787	7.35796		13.3332	1.32485	0.442162	2.9963	0.00273281	0.0124534
WBGene00009714		0.964267	1.03443	1.87746	1.04947	0	0.954664	0	1.05114		0.866428	1.32463	1.68098	0.788009	0.430691	NA
WBGene00018001		0.964267	1.03443	1.87746	1.04947	0	0.954664	0.996312	0		0.859575	1.32461	1.68274	0.787174	0.43118	NA
WBGene00165007		0.964267	1.03443	1.87746	1.04947	0	0.954664	0.996312	0		0.859575	1.32461	1.68274	0.787174	0.43118	NA
WBGene00008244		2.8928	2.06886	3.75492	1.04947	0.944571	1.90933	0	1.05114		1.70889	1.3245	1.22689	1.07956	0.280337	NA
WBGene00020182		161.033	253.435	184.93	146.925	66.12	57.2798	85.6828	89.3466		130.594	1.32444	0.229596	5.76857	7.99484e-09	2.43126e-07
WBGene00005172		0	0	2.81619	2.09893	0.944571	0	0	1.05114		0.863854	1.32405	1.94499	0.680751	0.496029	NA
WBGene00023191		6.74987	3.10328	7.50984	2.09893	2.83371	2.86399	0	2.10227		3.40774	1.32119	0.929937	1.42073	0.155396	NA
WBGene00007305		5.7856	1.03443	4.69365	3.1484	0.944571	1.90933	1.99262	1.05114		2.56997	1.32075	1.01128	1.30602	0.191546	NA
WBGene00017388		0.964267	5.17214	0.938731	5.24734	0.944571	1.90933	1.99262	0		2.14612	1.32059	1.18127	1.11794	0.263594	NA
WBGene00077789		0	1.03443	2.81619	1.04947	0	0.954664	0	1.05114		0.863236	1.31822	1.80634	0.729774	0.465528	NA
WBGene00195178		1.92853	0	1.87746	1.04947	0	1.90933	0	0		0.845599	1.31767	1.92298	0.685223	0.493203	NA
WBGene00014905		1.92853	1.03443	0.938731	1.04947	0	0	0.996312	1.05114		0.874826	1.31748	1.67985	0.784287	0.432872	NA
WBGene00006135		1.92853	0	0	1.04947	0.944571	0	0	0		0.490322	1.31714	2.46138	0.535125	0.592563	NA
WBGene00197410		1.92853	0	0	1.04947	0.944571	0	0	0		0.490322	1.31714	2.46138	0.535125	0.592563	NA
WBGene00010499		2.8928	0	0.938731	1.04947	0	0.954664	0	1.05114		0.86085	1.31473	1.80682	0.727648	0.466829	NA
WBGene00022884		2.8928	0	0.938731	1.04947	0	0.954664	0.996312	0		0.853997	1.31469	1.80906	0.726727	0.467393	NA
WBGene00001966		2.8928	2.06886	4.69365	0	1.88914	0.954664	0	1.05114		1.69378	1.31422	1.32264	0.993633	0.320402	NA
WBGene00044486		1.92853	2.06886	1.87746	6.2968	0.944571	2.86399	0.996312	0		2.12207	1.31269	1.15489	1.13664	0.255689	NA
WBGene00017508		10.6069	6.20657	6.57111	8.39574	1.88914	4.77332	2.98894	3.15341		5.57315	1.31224	0.679632	1.93081	0.0535069	0.123426
WBGene00013587		304.708	308.259	287.252	325.335	109.57	118.378	132.51	133.494		214.938	1.3121	0.141771	9.25503	2.14163e-20	4.03632e-18
WBGene00010706		106.069	96.2018	75.0984	62.968	42.5057	40.0959	28.8931	25.2273		59.6324	1.31188	0.27083	4.84391	1.27308e-06	2.03082e-05
WBGene00012108		0.964267	0	2.81619	1.04947	0	1.90933	0	0		0.842407	1.31181	1.95368	0.671453	0.501932	NA
WBGene00010300		1.92853	1.03443	0	0	0	0	0	1.05114		0.501762	1.31179	2.44476	0.536574	0.591562	NA
WBGene00020288		1.92853	1.03443	0	0	0	0	0	1.05114		0.501762	1.31179	2.44476	0.536574	0.591562	NA
WBGene00200577		1.92853	1.03443	0	0	0	0	0	1.05114		0.501762	1.31179	2.44476	0.536574	0.591562	NA
WBGene00005981		1.92853	1.03443	0	0	0	0	0.996312	0		0.494909	1.31177	2.45427	0.534487	0.593005	NA
WBGene00017095		2.8928	1.03443	0.938731	0	0	0.954664	0.996312	0		0.852117	1.31177	1.80943	0.724961	0.468476	NA
WBGene00005910		1.92853	1.03443	0	0	0	0.954664	0	0		0.489703	1.31176	2.46161	0.532885	0.594113	NA
WBGene00235128		1.92853	1.03443	0	0	0	0.954664	0	0		0.489703	1.31176	2.46161	0.532885	0.594113	NA
WBGene00005876		1.92853	1.03443	0	0	0.944571	0	0	0		0.488442	1.31175	2.46341	0.532494	0.594384	NA
WBGene00008853		1.92853	1.03443	0	0	0.944571	0	0	0		0.488442	1.31175	2.46341	0.532494	0.594384	NA
WBGene00019524		1.92853	1.03443	0	0	0.944571	0	0	0		0.488442	1.31175	2.46341	0.532494	0.594384	NA
WBGene00015933		3850.32	4186.33	3989.61	4987.07	1656.78	2091.67	1438.67	1666.05		2983.31	1.31166	0.143635	9.13193	6.72912e-20	1.23767e-17
WBGene00010456		1677.82	956.846	1669.06	1032.68	651.754	672.083	403.506	423.608		935.92	1.31072	0.234992	5.57771	2.43704e-08	6.53847e-07
WBGene00044683		0.964267	4.13771	2.81619	9.4452	0	1.90933	2.98894	2.10227		3.04549	1.31055	1.03653	1.26436	0.206099	NA
WBGene00007478		1.92853	1.03443	1.87746	0	0.944571	0	0	1.05114		0.854516	1.31054	1.78133	0.735713	0.461905	NA
WBGene00015944		0.964267	0	0.938731	1.04947	0	0	0	1.05114		0.50045	1.30858	2.19704	0.595613	0.551434	NA
WBGene00018081		0.964267	0	0.938731	1.04947	0	0	0	1.05114		0.50045	1.30858	2.19704	0.595613	0.551434	NA
WBGene00195739		0.964267	0	0.938731	1.04947	0	0	0	1.05114		0.50045	1.30858	2.19704	0.595613	0.551434	NA
WBGene00169639		0.964267	0	0.938731	1.04947	0	0	0.996312	0		0.493597	1.30855	2.2044	0.593608	0.552774	NA
WBGene00013163		0.964267	0	0.938731	1.04947	0	0.954664	0	0		0.488391	1.30852	2.2101	0.592066	0.553806	NA
WBGene00199658		0.964267	0	0.938731	1.04947	0	0.954664	0	0		0.488391	1.30852	2.2101	0.592066	0.553806	NA
WBGene00011983		0.964267	0	0.938731	1.04947	0.944571	0	0	0		0.487129	1.30852	2.21149	0.59169	0.554058	NA
WBGene00012816		0.964267	0	0.938731	1.04947	0.944571	0	0	0		0.487129	1.30852	2.21149	0.59169	0.554058	NA
WBGene00021591		0.964267	0	0.938731	1.04947	0.944571	0	0	0		0.487129	1.30852	2.21149	0.59169	0.554058	NA
WBGene00201303		0.964267	0	0.938731	1.04947	0.944571	0	0	0		0.487129	1.30852	2.21149	0.59169	0.554058	NA
WBGene00010265		3.85707	3.10328	5.63238	2.09893	0.944571	0.954664	0.996312	3.15341		2.59258	1.30758	0.997284	1.31114	0.189809	NA
WBGene00009077		3.85707	3.10328	4.69365	5.24734	1.88914	2.86399	1.99262	0		2.95589	1.30697	0.937282	1.39442	0.16319	NA
WBGene00018397		3.85707	2.06886	6.57111	2.09893	1.88914	0	1.99262	2.10227		2.5725	1.30646	1.0358	1.2613	0.207202	NA
WBGene00194695		135.962	141.717	189.624	131.183	68.0091	68.7358	59.7787	45.1989		105.026	1.30611	0.213184	6.12665	8.97504e-10	3.3747e-08
WBGene00013825		4.82134	1.03443	2.81619	1.04947	1.88914	0	0	2.10227		1.7141	1.30396	1.32258	0.985925	0.32417	NA
WBGene00003466		0.964267	1.03443	0.938731	0	0	0	0	1.05114		0.49857	1.30369	2.19855	0.592976	0.553197	NA
WBGene00003760		0.964267	1.03443	0.938731	0	0	0	0	1.05114		0.49857	1.30369	2.19855	0.592976	0.553197	NA
WBGene00005487		0.964267	1.03443	0.938731	0	0	0	0.996312	0		0.491717	1.30364	2.20595	0.590963	0.554545	NA
WBGene00008911		0.964267	1.03443	0.938731	0	0	0	0.996312	0		0.491717	1.30364	2.20595	0.590963	0.554545	NA
WBGene00021631		0.964267	1.03443	0.938731	0	0	0	0.996312	0		0.491717	1.30364	2.20595	0.590963	0.554545	NA
WBGene00010180		0.964267	1.03443	0.938731	0	0	0.954664	0	0		0.486511	1.3036	2.21168	0.589415	0.555583	NA
WBGene00016470		0.964267	1.03443	0.938731	0	0	0.954664	0	0		0.486511	1.3036	2.21168	0.589415	0.555583	NA
WBGene00198681		0.964267	1.03443	0.938731	0	0	0.954664	0	0		0.486511	1.3036	2.21168	0.589415	0.555583	NA
WBGene00014236		0.964267	1.03443	0.938731	0	0.944571	0	0	0		0.48525	1.30359	2.21308	0.589038	0.555836	NA
WBGene00044012		0.964267	1.03443	0.938731	0	0.944571	0	0	0		0.48525	1.30359	2.21308	0.589038	0.555836	NA
WBGene00044610		0.964267	1.03443	0.938731	0	0.944571	0	0	0		0.48525	1.30359	2.21308	0.589038	0.555836	NA
WBGene00044232		11.5712	7.24099	9.38731	10.4947	7.55657	0.954664	3.98525	3.15341		6.79301	1.30187	0.655582	1.98582	0.047053	0.112412
WBGene00015994		1.92853	1.03443	4.69365	2.09893	0	0.954664	0.996312	2.10227		1.7261	1.29944	1.24259	1.04576	0.295674	NA
WBGene00010228		0	5.17214	1.87746	5.24734	1.88914	0	0.996312	2.10227		2.16058	1.29931	1.23767	1.04981	0.293807	NA
WBGene00195439		0	1.03443	2.81619	1.04947	0	0	0	2.10227		0.875295	1.29845	1.94556	0.667389	0.504524	NA
WBGene00200358		0	0	1.87746	1.04947	0	0	0	1.05114		0.497258	1.29804	2.44939	0.529946	0.596149	NA
WBGene00044315		0	0	1.87746	1.04947	0	0	0.996312	0		0.490405	1.29799	2.45901	0.527849	0.597604	NA
WBGene00019253		0	0	1.87746	1.04947	0	0.954664	0	0		0.485199	1.29794	2.46646	0.526239	0.598722	NA
WBGene00044955		0	0	1.87746	1.04947	0	0.954664	0	0		0.485199	1.29794	2.46646	0.526239	0.598722	NA
WBGene00201804		0	0	1.87746	1.04947	0	0.954664	0	0		0.485199	1.29794	2.46646	0.526239	0.598722	NA
WBGene00202051		0	0	1.87746	1.04947	0	0.954664	0	0		0.485199	1.29794	2.46646	0.526239	0.598722	NA
WBGene00219654		0	0	1.87746	1.04947	0	0.954664	0	0		0.485199	1.29794	2.46646	0.526239	0.598722	NA
WBGene00050931		0	0	1.87746	1.04947	0.944571	0	0	0		0.483937	1.29793	2.46828	0.525846	0.598995	NA
WBGene00001706		0	1.03443	3.75492	0	0.944571	0	0.996312	0		0.841279	1.29624	1.99319	0.650334	0.515476	NA
WBGene00006075		14.464	11.3787	8.44858	11.5441	5.66743	6.68265	0.996312	5.25568		8.05469	1.29583	0.59812	2.16651	0.0302726	0.0804003
WBGene00044703		5.7856	11.3787	8.44858	8.39574	2.83371	2.86399	3.98525	4.20455		5.98702	1.2951	0.651187	1.98883	0.0467198	0.111913
WBGene00019376		54.9632	29.9984	65.7111	4.19787	18.8914	17.184	24.9078	2.10227		27.2445	1.29505	0.666431	1.94326	0.0519847	0.120957
WBGene00005227		2.8928	1.03443	0.938731	0	0	0	1.99262	0		0.857323	1.29383	1.94784	0.664237	0.506538	NA
WBGene00021447		2.8928	4.13771	8.44858	6.2968	1.88914	0.954664	3.98525	2.10227		3.8384	1.29381	0.840553	1.53924	0.123745	NA
WBGene00013299		1.92853	1.03443	1.87746	0	0	0	0.996312	1.05114		0.860984	1.29301	1.7805	0.726208	0.467711	NA
WBGene00219712		0	1.03443	1.87746	0	0	0	0.996312	0		0.488525	1.29256	2.46105	0.525206	0.59944	NA
WBGene00005308		0	1.03443	1.87746	0	0	0.954664	0	0		0.483319	1.2925	2.46854	0.523591	0.600563	NA
WBGene00013495		0	1.03443	1.87746	0	0.944571	0	0	0		0.482057	1.29249	2.47037	0.523197	0.600837	NA
WBGene00000851		2.8928	2.06886	0	9.4452	1.88914	2.86399	0	1.05114		2.52639	1.29008	1.22792	1.05062	0.293434	NA
WBGene00015629		5.7856	1.03443	9.38731	3.1484	0	1.90933	2.98894	3.15341		3.42593	1.28995	0.984374	1.31043	0.19005	NA
WBGene00021007		15.4283	4.13771	10.326	8.39574	2.83371	5.72798	3.98525	3.15341		6.74851	1.28897	0.65802	1.95886	0.0501287	0.117824
WBGene00014102		5.7856	3.10328	4.69365	3.1484	0.944571	2.86399	1.99262	1.05114		2.94791	1.28813	0.920547	1.39931	0.16172	NA
WBGene00169188		1.92853	1.03443	4.69365	4.19787	1.88914	1.90933	0.996312	0		2.08116	1.28764	1.14105	1.12847	0.259122	NA
WBGene00015030		1.92853	0	2.81619	0	0.944571	0	0.996312	0		0.835701	1.28732	1.95346	0.658996	0.509899	NA
WBGene00004000		609.417	285.502	332.311	46.1766	127.517	189.023	107.602	97.7557		224.413	1.28686	0.684278	1.88062	0.0600239	0.134925
WBGene00138721		26.9995	11.3787	39.4267	4.19787	17.9468	8.59198	6.97418	0		14.4395	1.28685	0.767983	1.67562	0.0938128	0.189037
WBGene00020840		13.4997	6.20657	22.5295	8.39574	1.88914	3.81866	8.96681	6.30682		8.95163	1.28665	0.639093	2.01325	0.0440881	0.107122
WBGene00011844		295.066	432.391	406.47	625.482	205.916	262.533	131.513	120.881		310.032	1.28569	0.273044	4.70873	2.49261e-06	3.61712e-05
WBGene00008946		4.82134	4.13771	1.87746	1.04947	0.944571	1.90933	1.99262	0		2.09156	1.28344	1.14142	1.12443	0.26083	NA
WBGene00001752		251.674	338.258	220.602	450.221	125.628	105.013	125.535	161.875		222.351	1.28317	0.236479	5.42616	5.75789e-08	1.39303e-06
WBGene00022446		2.8928	0	0	0	0	0.954664	0	0		0.480933	1.28294	2.85377	0.449561	0.653027	NA
WBGene00016252		2.8928	0	0	0	0.944571	0	0	0		0.479672	1.28293	2.85613	0.449184	0.653299	NA
WBGene00007674		0.964267	1.03443	2.81619	0	0	0	1.99262	0		0.850939	1.2825	1.9494	0.657893	0.510607	NA
WBGene00023483		5.7856	17.5853	9.38731	10.4947	6.612	2.86399	2.98894	5.25568		7.62168	1.2823	0.624463	2.05344	0.0400303	0.0996898
WBGene00000829		43616.7	47658.2	43885.7	46522.9	17774.9	17796.8	18824.3	20433.1		32064.1	1.27977	0.0905374	14.1353	2.30212e-45	2.70339e-42
WBGene00018761		12.5355	15.5164	17.8359	11.5441	5.66743	5.72798	3.98525	8.4091		10.1527	1.27894	0.509927	2.50807	0.0121392	0.0400165
WBGene00004960		91.6054	99.3051	114.525	122.788	51.9514	34.3679	40.8488	49.4034		75.5993	1.27862	0.22183	5.76395	8.217e-09	2.4889e-07
WBGene00018123		1.92853	0	0.938731	0	0	0	0	1.05114		0.4898	1.27636	2.45734	0.519409	0.603476	NA
WBGene00020292		1.92853	0	0.938731	0	0	0	0	1.05114		0.4898	1.27636	2.45734	0.519409	0.603476	NA
WBGene00006287		1.92853	0	0.938731	0	0	0	0.996312	0		0.482947	1.27624	2.46718	0.517289	0.604955	NA
WBGene00019558		1.92853	0	0.938731	0	0	0	0.996312	0		0.482947	1.27624	2.46718	0.517289	0.604955	NA
WBGene00009424		1.92853	0	0.938731	0	0	0.954664	0	0		0.477741	1.27615	2.47479	0.515661	0.606091	NA
WBGene00012754		1.92853	0	0.938731	0	0	0.954664	0	0		0.477741	1.27615	2.47479	0.515661	0.606091	NA
WBGene00045361		1.92853	0	0.938731	0	0	0.954664	0	0		0.477741	1.27615	2.47479	0.515661	0.606091	NA
WBGene00005599		1.92853	0	0.938731	0	0.944571	0	0	0		0.476479	1.27613	2.47665	0.515264	0.606369	NA
WBGene00020978		1.92853	0	0.938731	0	0.944571	0	0	0		0.476479	1.27613	2.47665	0.515264	0.606369	NA
WBGene00219756		3.85707	5.17214	2.81619	0	0.944571	1.90933	0.996312	1.05114		2.09334	1.27299	1.16018	1.09723	0.272539	NA
WBGene00012329		7.71414	17.5853	4.69365	6.2968	3.77828	0.954664	1.99262	8.4091		6.42807	1.27216	0.757709	1.67896	0.09316	0.188219
WBGene00044922		19.2853	42.4115	27.2232	61.9186	21.7251	21.9573	10.9594	7.35796		26.6048	1.27192	0.456732	2.78483	0.00535552	0.0211116
WBGene00010064		501.419	432.391	484.385	426.084	169.078	197.615	192.288	206.023		326.16	1.27104	0.13257	9.58763	9.01303e-22	1.93246e-19
WBGene00020071		2.8928	1.03443	0	3.1484	1.88914	0	0.996312	0		1.24514	1.27082	1.58329	0.802644	0.42218	NA
WBGene00021791		80.0342	80.6854	71.3435	90.2542	38.7274	16.2293	37.8599	40.9943		57.016	1.27069	0.278518	4.56233	5.05899e-06	6.57841e-05
WBGene00014037		1.92853	2.06886	4.69365	3.1484	0.944571	0.954664	1.99262	1.05114		2.09781	1.26751	1.07688	1.17702	0.239187	NA
WBGene00219791		0.964267	0	1.87746	0	0	0	0	1.05114		0.486608	1.26663	2.46079	0.514727	0.606744	NA
WBGene00236806		0.964267	0	1.87746	0	0	0	0	1.05114		0.486608	1.26663	2.46079	0.514727	0.606744	NA
WBGene00001890		0.964267	0	1.87746	0	0	0	0.996312	0		0.479755	1.26648	2.47072	0.512598	0.608232	NA
WBGene00018284		0.964267	0	1.87746	0	0	0	0.996312	0		0.479755	1.26648	2.47072	0.512598	0.608232	NA
WBGene00005829		0.964267	0	1.87746	0	0	0.954664	0	0		0.474549	1.26637	2.4784	0.510964	0.609376	NA
WBGene00011305		83.8912	83.7886	106.077	75.5616	44.3948	37.2319	30.8857	32.5852		61.802	1.26636	0.23591	5.36801	7.96117e-08	1.85834e-06
WBGene00006015		0.964267	0	1.87746	0	0.944571	0	0	0		0.473287	1.26634	2.48028	0.510565	0.609655	NA
WBGene00009693		0.964267	0	1.87746	0	0.944571	0	0	0		0.473287	1.26634	2.48028	0.510565	0.609655	NA
WBGene00235134		1.92853	3.10328	6.57111	0	0.944571	2.86399	0.996312	0		2.05098	1.26596	1.27416	0.993568	0.320433	NA
WBGene00003473		430.063	274.123	1031.66	75.5616	238.976	214.799	248.082	52.5568		320.728	1.26367	0.811963	1.55631	0.119633	0.226286
WBGene00235373		2.8928	3.10328	0.938731	0	1.88914	0.954664	0	0		1.22233	1.2607	1.58486	0.795459	0.426346	NA
WBGene00011716		1.92853	3.10328	4.69365	2.09893	0	0.954664	2.98894	1.05114		2.10239	1.25859	1.13062	1.11319	0.265627	NA
WBGene00012781		32.7851	22.7574	29.1006	20.9893	13.224	11.456	6.97418	12.6136		18.7375	1.25724	0.391145	3.21425	0.00130787	0.00686116
WBGene00016371		3.85707	0	0.938731	2.09893	1.88914	0.954664	0	0		1.21732	1.25491	1.59747	0.78556	0.432125	NA
WBGene00016972		6.74987	5.17214	1.87746	7.34627	2.83371	2.86399	0.996312	2.10227		3.74275	1.25345	0.84717	1.47957	0.138988	NA
WBGene00195174		3.85707	0	0.938731	2.09893	0.944571	1.90933	0	0		1.21858	1.25222	1.59725	0.78399	0.433046	NA
WBGene00022638		5.7856	2.06886	7.50984	3.1484	0.944571	4.77332	0.996312	1.05114		3.28476	1.25155	0.945052	1.32432	0.185396	NA
WBGene00010381		0	0	2.81619	0	0	0	0	1.05114		0.483416	1.25142	2.84544	0.439799	0.660083	NA
WBGene00020042		0	0	2.81619	0	0	0	0.996312	0		0.476563	1.25128	2.85829	0.437772	0.661552	NA
WBGene00023484		0	0	2.81619	0	0	0.954664	0	0		0.471357	1.25117	2.86823	0.436216	0.66268	NA
WBGene00022133		3.85707	2.06886	0.938731	0	1.88914	0.954664	0	0		1.21356	1.25051	1.59766	0.78271	0.433797	NA
WBGene00019015		11.5712	4.13771	1.87746	1.04947	1.88914	2.86399	0.996312	2.10227		3.31095	1.25031	0.988127	1.26533	0.205753	NA
WBGene00194665		4.82134	3.10328	0.938731	5.24734	0.944571	1.90933	1.99262	1.05114		2.50104	1.2502	1.02181	1.22352	0.221134	NA
WBGene00006409		0.964267	1.03443	1.87746	3.1484	1.88914	0	0	1.05114		1.2456	1.24842	1.46719	0.850887	0.394832	NA
WBGene00014904		38.5707	38.2738	43.1816	30.4345	8.50114	13.3653	21.9189	19.9716		26.7772	1.24791	0.352862	3.53655	0.00040539	0.00264927
WBGene00017679		4.82134	2.06886	6.57111	5.24734	1.88914	1.90933	0.996312	3.15341		3.3321	1.24734	0.877403	1.42162	0.155136	NA
WBGene00045050		51.1062	37.2394	43.1816	53.5228	25.5034	27.6853	16.9373	7.35796		32.8167	1.24693	0.361293	3.45129	0.000557906	0.00340271
WBGene00015688		18.3211	9.30985	30.0394	14.6925	6.612	5.72798	9.96312	8.4091		12.8844	1.24658	0.507285	2.45736	0.0139963	0.0447095
WBGene00000715		793.592	757.201	693.722	1088.3	259.757	251.077	410.481	484.574		592.338	1.24598	0.228295	5.45775	4.82205e-08	1.18923e-06
WBGene00045275		46.2848	118.959	47.8753	52.4734	18.8914	13.3653	33.8746	46.25		47.2467	1.24459	0.420105	2.96256	0.00305088	0.0136064
WBGene00009382		8.6784	13.4476	9.38731	10.4947	3.77828	3.81866	5.97787	4.20455		7.47341	1.2398	0.579509	2.1394	0.0324035	0.0846751
WBGene00007440		318.208	261.71	332.311	183.657	153.965	144.154	106.605	58.8637		194.934	1.23967	0.278857	4.44556	8.76632e-06	0.000105959
WBGene00020353		28.928	19.6541	21.5908	6.2968	6.612	6.68265	8.96681	10.5114		13.6553	1.23232	0.516671	2.38511	0.0170742	0.0520476
WBGene00005408		1.92853	3.10328	5.63238	3.1484	2.83371	0	1.99262	1.05114		2.46126	1.2322	1.04786	1.17593	0.239624	NA
WBGene00021381		11.5712	7.24099	11.2648	11.5441	4.72285	2.86399	5.97787	4.20455		7.4238	1.23161	0.585554	2.10332	0.0354377	0.0908313
WBGene00019917		54.9632	38.2738	57.2626	17.8409	21.7251	14.32	16.9373	18.9205		30.0304	1.23152	0.390771	3.15151	0.00162427	0.00814054
WBGene00017802		0	0	3.75492	3.1484	1.88914	0	0	1.05114		1.23045	1.23128	1.75141	0.703019	0.482044	NA
WBGene00015106		0.964267	1.03443	2.81619	2.09893	0.944571	0.954664	0	1.05114		1.23302	1.2312	1.40158	0.878435	0.379708	NA
WBGene00010155		8.6784	3.10328	7.50984	8.39574	4.72285	0.954664	2.98894	3.15341		4.93839	1.2308	0.747998	1.64546	0.0998756	0.198193
WBGene00010289		4.82134	11.3787	7.50984	17.8409	5.66743	4.77332	4.98156	2.10227		7.38443	1.22954	0.645866	1.9037	0.056949	0.129546
WBGene00013400		12.5355	16.5508	22.5295	10.4947	8.50114	2.86399	7.9705	7.35796		11.1005	1.22471	0.520773	2.35171	0.0186873	0.0557406
WBGene00008308		2.8928	3.10328	0.938731	0	0.944571	0	0.996312	1.05114		1.24085	1.22441	1.48983	0.821845	0.411165	NA
WBGene00000698		13578.8	15147.1	13114.1	22102.8	5120.52	3539.89	8525.44	10240.2		11421.1	1.22127	0.2818	4.33381	1.46553e-05	0.000163903
WBGene00010928		13.4997	9.30985	7.50984	6.2968	2.83371	6.68265	1.99262	4.20455		6.54122	1.22073	0.651402	1.87401	0.0609295	0.136466
WBGene00021358		6.74987	5.17214	5.63238	3.1484	1.88914	0.954664	2.98894	3.15341		3.71112	1.21999	0.823247	1.48192	0.138362	NA
WBGene00009293		65.5702	55.8591	54.4464	138.53	25.5034	32.4586	27.8967	49.4034		56.2084	1.21798	0.355206	3.42894	0.00060594	0.00362899
WBGene00017978		5.7856	0	4.69365	3.1484	1.88914	0.954664	1.99262	1.05114		2.4394	1.21748	1.09177	1.11514	0.264789	NA
WBGene00050926		3.85707	2.06886	6.57111	1.04947	1.88914	1.90933	0.996312	1.05114		2.42405	1.21743	1.04289	1.16736	0.243065	NA
WBGene00010965		11276.1	12058.3	14070.6	13398.5	5567.3	5531.32	4958.65	5797.02		9082.24	1.21703	0.109483	11.1161	1.04712e-28	3.80602e-26
WBGene00019783		3.85707	3.10328	4.69365	4.19787	1.88914	2.86399	1.99262	0		2.8247	1.2165	0.948167	1.28301	0.19949	NA
WBGene00206497		9.64267	6.20657	10.326	3.1484	5.66743	3.81866	0.996312	2.10227		5.23854	1.21557	0.753325	1.61361	0.106613	0.208063
WBGene00044399		0	1.03443	3.75492	2.09893	0	0.954664	0.996312	1.05114		1.2363	1.21481	1.50089	0.809388	0.418292	NA
WBGene00022628		2.8928	1.03443	1.87746	1.04947	0	0.954664	0.996312	1.05114		1.23203	1.21312	1.40056	0.86617	0.386397	NA
WBGene00012686		97.391	62.0657	75.0984	48.2755	36.8383	39.1412	26.9004	18.9205		50.5789	1.21267	0.310023	3.91155	9.17041e-05	0.000768429
WBGene00008154		1.92853	2.06886	1.87746	1.04947	0.944571	0	0	2.10227		1.2464	1.21217	1.44199	0.840624	0.400559	NA
WBGene00010963		6633.19	7033.07	6288.56	6756.47	2812.93	2544.18	2774.73	3400.43		4780.45	1.2119	0.115115	10.5277	6.43636e-26	1.92662e-23
WBGene00044158		3.85707	2.06886	4.69365	1.04947	0	0	0.996312	4.20455		2.10874	1.21015	1.24962	0.968421	0.332834	NA
WBGene00009963		2.8928	0	2.81619	1.04947	1.88914	0	0	1.05114		1.21234	1.21003	1.58368	0.764061	0.444831	NA
WBGene00001424		1.92853	2.06886	1.87746	1.04947	0	0.954664	0	2.10227		1.24766	1.20989	1.44179	0.839163	0.401378	NA
WBGene00044149		13.4997	20.6886	13.1422	7.34627	3.77828	6.68265	7.9705	5.25568		9.79549	1.20847	0.546107	2.21288	0.0269057	0.0735966
WBGene00001107		1.92853	2.06886	2.81619	0	0.944571	0	0.996312	1.05114		1.2257	1.20792	1.46658	0.823635	0.410147	NA
WBGene00001727		28.928	34.1361	30.0394	29.3851	16.0577	15.2746	6.97418	14.7159		21.9389	1.20522	0.361101	3.33762	0.00084499	0.00478295
WBGene00020117		4.82134	1.03443	4.69365	5.24734	1.88914	1.90933	1.99262	1.05114		2.82987	1.20456	0.950453	1.26735	0.205029	NA
WBGene00007248		30.8565	18.6197	29.1006	32.5335	12.2794	10.5013	14.9447	10.5114		19.9184	1.20448	0.377445	3.19114	0.00141712	0.00730374
WBGene00010361		10.6069	16.5508	9.38731	4.19787	3.77828	6.68265	2.98894	4.20455		7.29967	1.20397	0.638398	1.88593	0.0593047	0.133729
WBGene00016054		1.92853	4.13771	5.63238	2.09893	0	0	3.98525	2.10227		2.48564	1.20341	1.13838	1.05712	0.290457	NA
WBGene00002115		0.964267	2.06886	3.75492	0	0.944571	0	0.996312	1.05114		1.22251	1.20323	1.50151	0.801349	0.422929	NA
WBGene00077662		1.92853	1.03443	3.75492	0	0.944571	0.954664	0	1.05114		1.20853	1.20312	1.50272	0.800626	0.423348	NA
WBGene00007894		10.6069	4.13771	10.326	19.9399	9.44571	4.77332	0.996312	4.20455		8.05381	1.20284	0.689932	1.74341	0.0812612	0.170006
WBGene00009437		2.8928	5.17214	8.44858	8.39574	2.83371	2.86399	2.98894	2.10227		4.46227	1.20267	0.760658	1.58109	0.113857	0.218468
WBGene00022079		5.7856	0	0.938731	0	0.944571	0	1.99262	0		1.20769	1.20214	1.82319	0.659359	0.509666	NA
WBGene00013863		15.4283	16.5508	15.9584	20.9893	2.83371	5.72798	6.97418	14.7159		12.3973	1.20196	0.511789	2.34854	0.018847	0.0560416
WBGene00018745		2.8928	1.03443	1.87746	1.04947	0	0	1.99262	1.05114		1.23724	1.2018	1.46539	0.820127	0.412143	NA
WBGene00196000		5.7856	0	0.938731	2.09893	2.83371	0.954664	0	0		1.57646	1.20124	1.5168	0.791958	0.428385	NA
WBGene00022438		4.82134	6.20657	5.63238	8.39574	2.83371	0.954664	3.98525	3.15341		4.49788	1.20014	0.751713	1.59655	0.110367	0.213355
WBGene00206507		1.92853	1.03443	0.938731	3.1484	0	0	0	3.15341		1.27544	1.19972	1.57825	0.760157	0.447161	NA
WBGene00016963		1.92853	0	4.69365	0	0.944571	0.954664	0.996312	0		1.18972	1.19937	1.6436	0.729724	0.465559	NA
WBGene00195250		3.85707	3.10328	1.87746	0	1.88914	1.90933	0	0		1.57954	1.19884	1.41837	0.845224	0.397986	NA
WBGene00010682		4.82134	4.13771	2.81619	4.19787	1.88914	0	1.99262	3.15341		2.87604	1.19732	0.951746	1.25803	0.208382	NA
WBGene00008854		23.1424	26.8951	20.6521	36.7313	4.72285	6.68265	20.9226	14.7159		19.3081	1.19686	0.465295	2.57227	0.0101035	0.0347075
WBGene00000596		10.6069	4.13771	5.63238	17.8409	8.50114	1.90933	2.98894	3.15341		6.84635	1.19635	0.720812	1.65972	0.0969705	0.19389
WBGene00023246		1.92853	1.03443	2.81619	1.04947	0	0.954664	0	2.10227		1.23569	1.19585	1.46519	0.816176	0.414399	NA
WBGene00206474		1.92853	5.17214	7.50984	1.04947	0.944571	2.86399	1.99262	1.05114		2.81404	1.19493	1.00654	1.18717	0.235162	NA
WBGene00013613		11.5712	23.7918	11.2648	10.4947	2.83371	1.90933	10.9594	9.46023		10.2856	1.19263	0.610453	1.95368	0.0507393	0.118893
WBGene00019094		10.6069	10.3443	10.326	2.09893	2.83371	7.63731	1.99262	2.10227		5.99276	1.192	0.745211	1.59955	0.109698	0.212411
WBGene00045418		1658.54	1828.87	1709.43	1687.54	735.821	686.403	822.954	770.483		1237.51	1.19108	0.101791	11.7012	1.25662e-31	6.18825e-29
WBGene00003469		21.2139	10.3443	20.6521	15.742	2.83371	3.81866	13.9484	9.46023		12.2517	1.18989	0.548783	2.16823	0.0301414	0.0801217
WBGene00016843		2.8928	4.13771	0.938731	1.04947	0.944571	0.954664	0.996312	1.05114		1.62067	1.18984	1.22848	0.968544	0.332773	NA
WBGene00006229		2.8928	2.06886	1.87746	2.09893	0.944571	0.954664	1.99262	0		1.60374	1.1897	1.22688	0.969693	0.3322	NA
WBGene00016053		1.92853	1.03443	8.44858	2.09893	1.88914	0	0.996312	3.15341		2.44367	1.18801	1.14515	1.03743	0.299535	NA
WBGene00014914		9.64267	16.5508	17.8359	14.6925	1.88914	6.68265	8.96681	8.4091		10.5837	1.18704	0.53588	2.21512	0.026752	0.0733076
WBGene00022333		48.2134	38.2738	59.14	39.8797	18.8914	23.8666	17.9336	21.0227		33.4027	1.18585	0.300223	3.94988	7.81896e-05	0.000673233
WBGene00019430		39.535	18.6197	39.4267	14.6925	10.3903	6.68265	17.9336	14.7159		20.2495	1.18506	0.463077	2.55911	0.0104942	0.0357679
WBGene00022761		14.464	7.24099	13.1422	9.4452	5.66743	8.59198	1.99262	3.15341		7.96223	1.18443	0.608801	1.94551	0.0517138	0.120509
WBGene00016382		0.964267	2.06886	3.75492	0	0	0.954664	0	2.10227		1.23062	1.18436	1.59364	0.743179	0.457373	NA
WBGene00021741		21.2139	22.7574	18.7746	25.1872	9.44571	3.81866	11.9557	13.6648		15.8523	1.18383	0.435283	2.71968	0.00653461	0.0246619
WBGene00045067		4.82134	3.10328	0	3.1484	0.944571	2.86399	0.996312	0		1.98474	1.18293	1.25874	0.939773	0.347334	NA
WBGene00019281		1.92853	3.10328	1.87746	2.09893	0.944571	0	1.99262	1.05114		1.62457	1.18215	1.22643	0.963893	0.335099	NA
WBGene00017922		1.92853	2.06886	1.87746	3.1484	0	0.954664	1.99262	1.05114		1.62771	1.18197	1.22642	0.963756	0.335168	NA
WBGene00045265		55.9275	59.9968	69.4661	79.7595	30.2263	13.3653	37.8599	35.7387		47.7925	1.18137	0.308703	3.82688	0.000129776	0.00102386
WBGene00010343		2.8928	1.03443	2.81619	0	0.944571	0	0	2.10227		1.22378	1.18097	1.58168	0.746656	0.455271	NA
WBGene00020370		0.964267	1.03443	4.69365	0	0	0	2.98894	0		1.21016	1.1809	1.79989	0.656093	0.511764	NA
WBGene00045488		27.9637	51.7214	37.5492	87.1058	19.836	20.0479	23.9115	26.2784		36.8017	1.18002	0.372694	3.16619	0.00154448	0.00782286
WBGene00012501		17.3568	19.6541	32.8556	30.4345	9.44571	15.2746	7.9705	11.5625		18.0693	1.17999	0.415538	2.83966	0.00451614	0.0184885
WBGene00005013		1.92853	0	3.75492	1.04947	0	0	1.99262	1.05114		1.22209	1.1788	1.59422	0.739422	0.459651	NA
WBGene00044787		9.64267	4.13771	10.326	2.09893	5.66743	2.86399	2.98894	0		4.71571	1.1785	0.858438	1.37284	0.169801	0.292008
WBGene00001119		146.569	141.717	122.974	136.431	56.6743	77.3278	48.8193	58.8637		98.6718	1.17846	0.198147	5.94738	2.7247e-09	9.30542e-08
WBGene00044505		2.8928	3.10328	2.81619	0	0	1.90933	1.99262	0		1.58928	1.17481	1.40474	0.836322	0.402974	NA
WBGene00009324		4.82134	1.03443	2.81619	0	1.88914	0.954664	0.996312	0		1.56401	1.17078	1.37889	0.849077	0.395838	NA
WBGene00022016		5.7856	3.10328	2.81619	8.39574	1.88914	1.90933	1.99262	3.15341		3.63066	1.17008	0.842469	1.38887	0.164872	NA
WBGene00011805		621.952	670.309	638.337	669.56	243.699	275.898	301.883	335.313		469.619	1.16964	0.129959	9.0001	2.25518e-19	3.74212e-17
WBGene00007991		489.848	524.455	479.691	539.426	197.415	239.621	236.126	231.25		367.229	1.16893	0.124699	9.37399	6.98394e-21	1.40285e-18
WBGene00022708		2.8928	1.03443	3.75492	1.04947	1.88914	0.954664	0	1.05114		1.57832	1.16842	1.27518	0.916275	0.359523	NA
WBGene00000694		4.82134	3.10328	5.63238	4.19787	1.88914	0.954664	1.99262	3.15341		3.21809	1.16819	0.868646	1.34484	0.178677	NA
WBGene00011210		1.92853	2.06886	3.75492	1.04947	0.944571	0	2.98894	0		1.59191	1.16796	1.33652	0.87388	0.382183	NA
WBGene00010989		307.601	370.325	291.006	598.196	129.406	106.922	168.377	293.267		283.138	1.16789	0.306872	3.80579	0.000141355	0.00110211
WBGene00003999		1808.97	819.267	939.669	91.3036	394.831	533.657	364.65	337.415		661.22	1.16619	0.741615	1.57251	0.115833	0.221427
WBGene00013452		4.82134	3.10328	6.57111	3.1484	2.83371	0.954664	0.996312	3.15341		3.19778	1.16593	0.892598	1.30622	0.191477	NA
WBGene00021878		3.85707	2.06886	8.44858	1.04947	0.944571	1.90933	0.996312	3.15341		2.80345	1.16416	1.01688	1.14484	0.252276	NA
WBGene00010254		11.5712	7.24099	7.50984	2.09893	4.72285	2.86399	2.98894	2.10227		5.13738	1.16413	0.74626	1.55995	0.118772	0.225097
WBGene00019026		12.5355	7.24099	8.44858	7.34627	2.83371	0	8.96681	4.20455		6.44705	1.16379	0.737256	1.57855	0.11444	0.219203
WBGene00016896		75.2128	94.1329	105.138	76.6111	47.2285	42.0052	40.8488	26.2784		63.432	1.16343	0.247226	4.70595	2.52692e-06	3.64957e-05
WBGene00010241		8.6784	9.30985	11.2648	10.4947	2.83371	2.86399	9.96312	2.10227		7.18885	1.16343	0.640953	1.81515	0.0695009	0.150882
WBGene00007165		422.349	583.417	534.138	575.108	192.692	193.797	259.041	299.574		382.515	1.16326	0.182345	6.37946	1.77708e-10	8.00263e-09
WBGene00010114		2.8928	2.06886	2.81619	1.04947	1.88914	0	0	2.10227		1.60234	1.16206	1.30126	0.893028	0.371842	NA
WBGene00019514		11.5712	8.27542	6.57111	6.2968	5.66743	2.86399	5.97787	0		5.90298	1.16185	0.72495	1.60267	0.109008	0.21137
WBGene00000663		0	4.13771	4.69365	4.19787	4.72285	0	0	1.05114		2.3504	1.15969	1.3247	0.875437	0.381336	NA
WBGene00014121		10.6069	5.17214	8.44858	4.19787	4.72285	0.954664	4.98156	2.10227		5.14836	1.15949	0.744431	1.55755	0.119339	0.22595
WBGene00018119		1.92853	2.06886	3.75492	1.04947	0	0.954664	1.99262	1.05114		1.60003	1.15885	1.25487	0.923482	0.355756	NA
WBGene00013540		374.136	245.159	337.943	151.123	121.85	129.834	131.513	113.523		200.635	1.15884	0.250487	4.62634	3.72187e-06	5.04153e-05
WBGene00000546		26.0352	17.5853	32.8556	11.5441	8.50114	8.59198	7.9705	14.7159		15.975	1.15796	0.463931	2.49596	0.0125615	0.0411423
WBGene00009682		16.3925	5.17214	14.081	8.39574	4.72285	0.954664	8.96681	5.25568		7.99267	1.15792	0.661385	1.75075	0.0799887	0.168058
WBGene00010964		35453.2	35653.6	35600.4	39160.9	15648.7	16113.8	15948	17667.5		26405.8	1.1578	0.087926	13.1679	1.34254e-39	8.91099e-37
WBGene00021310		32.7851	31.0328	34.733	50.3744	18.8914	21.0026	14.9447	11.5625		26.9158	1.15745	0.340896	3.39532	0.000685476	0.00401707
WBGene00021623		1.92853	4.13771	0	3.1484	0	0	0	4.20455		1.6774	1.15698	1.60266	0.721916	0.470346	NA
WBGene00013535		36.6422	35.1705	35.6718	28.3356	17.0023	14.32	16.9373	12.6136		24.5867	1.15693	0.327585	3.53168	0.000412927	0.00268358
WBGene00013221		69.4272	92.0641	85.4245	62.968	32.1154	34.3679	33.8746	38.8921		56.1417	1.15635	0.240263	4.81284	1.48801e-06	2.30618e-05
WBGene00000819		26.0352	42.4115	28.1619	31.484	9.44571	12.4106	17.9336	17.8693		23.219	1.15533	0.364132	3.17284	0.00150958	0.00767151
WBGene00010100		5.7856	5.17214	1.87746	0	2.83371	2.86399	0	0		2.31661	1.15377	1.29566	0.890488	0.373204	NA
WBGene00015366		46.2848	33.1017	46.9365	24.1377	16.0577	15.2746	24.9078	11.5625		27.2829	1.15235	0.364806	3.15882	0.00158411	0.0079812
WBGene00014838		4.82134	4.13771	0.938731	1.04947	2.83371	0	0	2.10227		1.9854	1.15094	1.27011	0.906173	0.364844	NA
WBGene00016447		37.6064	17.5853	37.5492	31.484	7.55657	6.68265	15.941	26.2784		22.5854	1.15057	0.460792	2.49694	0.0125271	0.0410648
WBGene00077439		3.85707	6.20657	6.57111	9.4452	6.612	1.90933	0.996312	2.10227		4.71248	1.15045	0.78447	1.46653	0.142504	0.257435
WBGene00012498		9.64267	13.4476	6.57111	5.24734	1.88914	5.72798	5.97787	2.10227		6.32574	1.1489	0.677317	1.69626	0.0898374	0.183141
WBGene00015442		2.8928	3.10328	1.87746	5.24734	0.944571	2.86399	0.996312	1.05114		2.37211	1.14853	1.02273	1.123	0.261437	NA
WBGene00009537		17.3568	6.20657	17.8359	8.39574	6.612	6.68265	2.98894	6.30682		9.04817	1.14611	0.583564	1.96398	0.0495324	0.116764
WBGene00019044		27.9637	24.8263	24.407	18.8904	10.3903	8.59198	9.96312	14.7159		17.4686	1.14574	0.391241	2.92849	0.00340616	0.0147723
WBGene00009221		8863.54	6737.23	5663.36	629.68	2148.9	1409.08	4975.58	1364.38		3973.97	1.14532	0.791432	1.44715	0.147854	0.26462
WBGene00008069		1.92853	6.20657	3.75492	14.6925	2.83371	0.954664	2.98894	5.25568		4.82695	1.14458	0.843539	1.35688	0.174819	0.298521
WBGene00018783		4.82134	8.27542	4.69365	6.2968	1.88914	2.86399	2.98894	3.15341		4.37284	1.14425	0.744428	1.53709	0.124272	0.232831
WBGene00003470		34.7136	17.5853	37.5492	26.2367	11.3349	8.59198	9.96312	23.125		21.1375	1.143	0.42489	2.69012	0.00714265	0.0265691
WBGene00015403		458.027	424.115	628.949	434.479	216.307	219.573	206.237	239.659		353.418	1.14286	0.161947	7.05702	1.70114e-12	1.16455e-10
WBGene00008794		4.82134	8.27542	13.1422	8.39574	4.72285	2.86399	5.97787	2.10227		6.28771	1.14227	0.661694	1.72629	0.084296	0.174941
WBGene00012219		5.7856	7.24099	5.63238	3.1484	0.944571	2.86399	2.98894	3.15341		3.96979	1.14195	0.79545	1.43561	0.151114	0.268775
WBGene00013033		9.64267	2.06886	3.75492	4.19787	1.88914	0.954664	1.99262	4.20455		3.58816	1.14084	0.887919	1.28485	0.198846	NA
WBGene00015931		3.85707	1.03443	2.81619	9.4452	2.83371	3.81866	0.996312	0		3.1002	1.14071	1.03667	1.10036	0.271174	NA
WBGene00011550		4.82134	3.10328	2.81619	2.09893	3.77828	0	1.99262	0		2.32633	1.14011	1.13102	1.00804	0.313435	NA
WBGene00009509		17.3568	17.5853	22.5295	25.1872	7.55657	9.54664	9.96312	10.5114		15.0296	1.13972	0.414744	2.74801	0.00599583	0.0230615
WBGene00017118		3.85707	1.03443	3.75492	2.09893	0.944571	0.954664	2.98894	0		1.95419	1.13903	1.17038	0.973219	0.330445	NA
WBGene00195170		3.85707	3.10328	1.87746	4.19787	1.88914	0.954664	1.99262	1.05114		2.36541	1.13892	1.00161	1.13709	0.255501	NA
WBGene00020637		0.964267	1.03443	6.57111	0	1.88914	0	0.996312	1.05114		1.5633	1.13849	1.44866	0.785889	0.431932	NA
WBGene00016302		7.71414	4.13771	8.44858	1.04947	1.88914	4.77332	1.99262	1.05114		3.88201	1.13745	0.886236	1.28346	0.199331	0.329613
WBGene00219218		77.1414	85.8575	81.6696	119.639	33.06	34.3679	43.8377	54.6591		66.2791	1.13727	0.253224	4.49119	7.08279e-06	8.78357e-05
WBGene00007473		14.464	10.3443	12.2035	16.7915	10.3903	5.72798	3.98525	4.20455		9.76391	1.13585	0.531438	2.13732	0.0325718	0.0849549
WBGene00022754		26.0352	13.4476	20.6521	13.6431	5.66743	5.72798	11.9557	10.5114		13.4551	1.13562	0.476538	2.38307	0.017169	0.0522324
WBGene00009706		82.927	72.4099	60.0788	100.749	24.5588	22.9119	32.8783	64.1194		57.5791	1.13535	0.332574	3.41382	0.000640594	0.00380072
WBGene00021034		81.9627	88.9608	83.547	120.689	31.1708	49.6425	42.8414	47.3012		68.2644	1.13383	0.240852	4.70758	2.50674e-06	3.62385e-05
WBGene00045382		15.4283	10.3443	19.7133	16.7915	7.55657	9.54664	5.97787	5.25568		11.3268	1.13286	0.485824	2.33183	0.0197095	0.0578291
WBGene00015602		73.2843	75.5132	76.9759	33.5829	30.2263	35.3226	37.8599	14.7159		47.1851	1.13286	0.347324	3.26167	0.00110756	0.00598515
WBGene00045188		2.8928	0	5.63238	0	1.88914	0	0.996312	1.05114		1.55772	1.13136	1.51597	0.746291	0.455492	NA
WBGene00077441		14.464	5.17214	7.50984	5.24734	2.83371	2.86399	3.98525	5.25568		5.9165	1.13106	0.684717	1.65187	0.0985612	0.196069
WBGene00003446		33.7494	12.4131	28.1619	20.9893	6.612	10.5013	9.96312	16.8182		17.401	1.13045	0.453537	2.49253	0.0126838	0.0414094
WBGene00018375		44.3563	85.8575	76.9759	79.7595	28.3371	36.2772	35.8672	30.483		52.2392	1.1298	0.275681	4.09823	4.1633e-05	0.000398726
WBGene00013474		43.392	17.5853	34.733	13.6431	13.224	10.5013	16.9373	9.46023		19.9345	1.12976	0.45506	2.48266	0.0130406	0.0422582
WBGene00000620		29.8923	130.338	28.1619	239.278	38.7274	26.7306	43.8377	86.1932		77.8949	1.12949	0.78642	1.43624	0.150934	0.26855
WBGene00008390		296.994	608.244	338.882	1021.13	234.254	220.527	298.894	281.705		412.579	1.12918	0.317285	3.55888	0.000372437	0.00247201
WBGene00174712		8.6784	0	1.87746	0	1.88914	0.954664	1.99262	0		1.92404	1.12721	1.47155	0.766005	0.443673	NA
WBGene00019086		2.8928	7.24099	1.87746	3.1484	3.77828	0	0	3.15341		2.76142	1.12677	1.10098	1.02343	0.306106	NA
WBGene00050934		3.85707	1.03443	3.75492	2.09893	0.944571	0.954664	0.996312	2.10227		1.9679	1.12644	1.11077	1.01411	0.310531	NA
WBGene00014247		7.71414	9.30985	14.081	7.34627	7.55657	1.90933	4.98156	3.15341		7.00651	1.12605	0.633026	1.77884	0.0752664	0.160443
WBGene00045475		26.9995	27.9295	29.1006	18.8904	11.3349	13.3653	10.9594	11.5625		18.7678	1.1256	0.373873	3.01064	0.00260699	0.0119983
WBGene00021118		24.1067	10.3443	15.9584	35.6819	10.3903	8.59198	10.9594	9.46023		15.6866	1.12532	0.472117	2.38356	0.0171463	0.0522097
WBGene00000712		539.99	375.497	474.059	627.581	193.637	61.0985	292.916	377.358		367.767	1.12518	0.524314	2.14601	0.0318724	0.083602
WBGene00020254		62.6774	62.0657	56.3238	58.7702	26.448	37.2319	23.9115	22.0739		43.6878	1.12465	0.263087	4.27483	1.91283e-05	0.000205642
WBGene00016528		4.82134	2.06886	3.75492	2.09893	2.83371	0.954664	0.996312	1.05114		2.32248	1.12444	1.0282	1.0936	0.274129	NA
WBGene00019728		32.7851	43.446	45.0591	41.9787	18.8914	14.32	25.9041	15.7671		29.7689	1.12428	0.316602	3.55109	0.000383639	0.00253336
WBGene00008810		30.8565	35.1705	34.733	33.5829	20.7806	18.1386	12.9521	9.46023		24.4593	1.12262	0.343357	3.26955	0.0010772	0.00585006
WBGene00008493		29.8923	86.8919	31.9168	166.865	34.0046	43.9145	27.8967	38.8921		57.5343	1.12207	0.467456	2.40037	0.0163786	0.0503894
WBGene00014093		3.85707	3.10328	4.69365	1.04947	2.83371	0.954664	0.996312	1.05114		2.31741	1.12148	1.04346	1.07477	0.282477	NA
WBGene00015987		0.964267	0	7.50984	2.09893	1.88914	0.954664	0.996312	1.05114		1.93304	1.12137	1.26779	0.884509	0.376421	NA
WBGene00009902		251.674	321.707	268.477	493.25	122.794	121.242	129.521	241.762		243.803	1.1185	0.272018	4.11188	3.92454e-05	0.000379671
WBGene00011753		1129.16	1422.34	921.833	1525.93	385.385	332.223	645.61	940.768		912.905	1.118	0.284932	3.92375	8.718e-05	0.0007373
WBGene00012848		15.4283	13.4476	10.326	20.9893	2.83371	5.72798	13.9484	5.25568		10.9946	1.11704	0.553757	2.0172	0.0436748	0.106474
WBGene00016312		1.92853	1.03443	6.57111	1.04947	1.88914	0	1.99262	1.05114		1.93956	1.11702	1.22195	0.914135	0.360646	NA
WBGene00185077		10.6069	10.3443	10.326	17.8409	7.55657	4.77332	4.98156	5.25568		8.96067	1.11509	0.538003	2.07264	0.0382058	0.0962935
WBGene00003467		66.5344	20.6886	91.0569	40.9292	17.0023	19.0933	29.8894	35.7387		40.1166	1.11471	0.42756	2.60714	0.00913022	0.0320345
WBGene00017384		1.92853	6.20657	3.75492	1.04947	1.88914	0	0.996312	3.15341		2.37229	1.1146	1.107	1.00686	0.314	NA
WBGene00017058		0.964267	1.03443	5.63238	3.1484	0	1.90933	0	3.15341		1.98028	1.11378	1.28112	0.869379	0.38464	NA
WBGene00022876		4.82134	0	4.69365	1.04947	1.88914	0	1.99262	1.05114		1.93717	1.11357	1.28608	0.865862	0.386566	NA
WBGene00011450		11.5712	7.24099	13.1422	8.39574	5.66743	4.77332	1.99262	6.30682		7.38629	1.11283	0.599088	1.85754	0.0632338	0.140146
WBGene00009321		9.64267	2.06886	6.57111	9.4452	0.944571	5.72798	1.99262	4.20455		5.0747	1.11253	0.78402	1.419	0.155898	0.274883
WBGene00013484		76.1771	102.408	69.4661	108.095	43.4503	35.3226	44.834	40.9943		65.0935	1.11104	0.239725	4.63463	3.57581e-06	4.86527e-05
WBGene00010904		2189.85	1876.45	1536.7	2786.34	823.666	868.744	928.563	1263.47		1534.22	1.11101	0.198315	5.60222	2.1162e-08	5.76891e-07
WBGene00020832		9.64267	14.482	13.1422	9.4452	7.55657	3.81866	4.98156	5.25568		8.54057	1.11027	0.545288	2.03612	0.0417381	0.103045
WBGene00220228		4.82134	2.06886	2.81619	3.1484	0.944571	0.954664	0.996312	3.15341		2.36297	1.1098	1.02083	1.08715	0.276972	NA
WBGene00011793		34.7136	23.7918	35.6718	22.0388	10.3903	21.9573	9.96312	11.5625		21.2612	1.1094	0.395468	2.80529	0.00502717	0.0200692
WBGene00021727		8.6784	5.17214	7.50984	10.4947	2.83371	3.81866	4.98156	3.15341		5.8303	1.10729	0.652503	1.69699	0.0896982	0.182958
WBGene00009644		50.1419	77.5821	69.4661	54.5723	23.6143	22.9119	29.8894	40.9943		46.1465	1.10607	0.285438	3.87498	0.000106633	0.000869587
WBGene00009788		2.8928	3.10328	5.63238	3.1484	1.88914	1.90933	0.996312	2.10227		2.70924	1.105	0.934575	1.18235	0.237065	NA
WBGene00013978		10.6069	5.17214	9.38731	6.2968	2.83371	5.72798	4.98156	1.05114		5.7572	1.10445	0.691408	1.5974	0.110177	0.213074
WBGene00017441		55.9275	71.3755	55.3851	50.3744	25.5034	20.0479	40.8488	22.0739		42.6921	1.1035	0.293253	3.76296	0.000167917	0.00128022
WBGene00003457		47.2491	21.723	36.6105	26.2367	8.50114	10.5013	22.9152	19.9716		24.2136	1.10083	0.414312	2.65702	0.0078835	0.0287093
WBGene00021859		7.71414	3.10328	2.81619	1.04947	1.88914	0.954664	2.98894	1.05114		2.69587	1.09926	1.00865	1.08983	0.275787	NA
WBGene00019541		27.9637	19.6541	27.2232	28.3356	9.44571	14.32	14.9447	9.46023		18.9184	1.09858	0.379144	2.89752	0.0037612	0.0159851
WBGene00000732		267.102	368.256	247.825	959.213	140.741	76.3731	261.034	382.614		337.895	1.09808	0.654902	1.67671	0.0935998	0.188799
WBGene00050935		11.5712	11.3787	8.44858	12.5936	6.612	7.63731	2.98894	3.15341		8.04797	1.09577	0.57123	1.91827	0.055077	0.126266
WBGene00196720		0	3.10328	0	3.1484	0.944571	1.90933	0	0		1.1382	1.09516	1.78279	0.614297	0.539019	NA
WBGene00000646		1.92853	5.17214	3.75492	6.2968	0	1.90933	1.99262	4.20455		3.15736	1.09502	0.950598	1.15193	0.24935	NA
WBGene00013009		48.2134	35.1705	40.3654	44.0776	17.9468	21.0026	26.9004	12.6136		30.7863	1.09459	0.316233	3.46134	0.000537498	0.00330998
WBGene00019785		8.6784	6.20657	9.38731	9.4452	3.77828	2.86399	3.98525	5.25568		6.20009	1.09403	0.625193	1.74991	0.0801334	0.168315
WBGene00007521		206.353	289.64	199.95	356.819	127.517	74.4638	164.391	127.188		193.29	1.09265	0.257533	4.24274	2.20812e-05	0.000231388
WBGene00022688		4.82134	6.20657	2.81619	3.1484	1.88914	0.954664	0.996312	4.20455		3.12965	1.09263	0.909442	1.20143	0.229584	NA
WBGene00015735		729.95	722.031	674.009	736.726	397.664	418.143	276.975	250.171		525.708	1.0907	0.17518	6.22617	4.77983e-10	1.90038e-08
WBGene00021298		18.3211	28.964	15.9584	29.3851	9.44571	13.3653	8.96681	11.5625		16.9961	1.09043	0.413727	2.63562	0.0083985	0.0300966
WBGene00016541		26.9995	12.4131	22.5295	11.5441	6.612	5.72798	11.9557	10.5114		13.5367	1.09007	0.488831	2.22996	0.02575	0.071176
WBGene00010470		613.274	611.347	523.812	974.955	306.986	369.455	272.99	330.057		500.359	1.08926	0.199619	5.45668	4.85124e-08	1.1945e-06
WBGene00044492		8.6784	12.4131	11.2648	11.5441	6.612	4.77332	5.97787	3.15341		8.05213	1.08914	0.554554	1.964	0.0495304	0.116764
WBGene00012486		4.82134	5.17214	4.69365	2.09893	0.944571	2.86399	0.996312	3.15341		3.09304	1.08855	0.902071	1.20672	0.227538	NA
WBGene00020356		7.71414	3.10328	3.75492	2.09893	1.88914	0.954664	3.98525	1.05114		3.06893	1.08783	0.936772	1.16126	0.245537	NA
WBGene00016999		3.85707	2.06886	5.63238	1.04947	0	0.954664	2.98894	2.10227		2.33171	1.08777	1.10376	0.985516	0.324371	NA
WBGene00002118		7.71414	5.17214	16.8972	24.1377	10.3903	7.63731	2.98894	4.20455		9.89278	1.08682	0.633419	1.7158	0.0861984	0.17781
WBGene00019207		3797.28	3967.03	3616.93	4494.87	1980.77	1740.35	1717.64	2040.26		2919.39	1.08591	0.114955	9.44636	3.50807e-21	7.14055e-19
WBGene00022589		15.4283	14.482	10.326	11.5441	5.66743	11.456	4.98156	2.10227		9.49846	1.08471	0.56002	1.93691	0.0527558	0.122137
WBGene00008394		712.593	769.614	905.875	741.973	317.376	304.538	478.23	377.358		575.945	1.08377	0.166133	6.52349	6.86879e-11	3.42676e-09
WBGene00010105		14.464	8.27542	9.38731	5.24734	1.88914	7.63731	4.98156	3.15341		6.87944	1.08364	0.652205	1.66151	0.0966114	0.193331
WBGene00022323		4.82134	9.30985	5.63238	5.24734	3.77828	2.86399	2.98894	2.10227		4.59305	1.08279	0.728221	1.4869	0.137042	0.249831
WBGene00001780		9.64267	5.17214	3.75492	8.39574	4.72285	3.81866	1.99262	2.10227		4.95023	1.08148	0.72861	1.48431	0.137726	0.250899
WBGene00003099		20.2496	21.723	45.9978	12.5936	18.8914	14.32	8.96681	5.25568		18.4997	1.08097	0.507518	2.12991	0.0331787	0.0861845
WBGene00003522		1.92853	6.20657	2.81619	218.289	10.3903	5.72798	2.98894	89.3466		42.2118	1.08025	1.64444	0.656914	NA	NA
WBGene00005228		208.282	138.613	210.276	4.19787	77.4548	87.8291	86.6792	13.6648		103.375	1.07943	1.00988	1.06887	0.285129	0.426618
WBGene00004958		14.464	16.5508	17.8359	22.0388	10.3903	1.90933	14.9447	6.30682		13.0551	1.07881	0.522503	2.06469	0.0389522	0.0976426
WBGene00009960		2.8928	2.06886	5.63238	4.19787	0	0.954664	1.99262	4.20455		2.74297	1.07832	1.01683	1.06048	0.288928	NA
WBGene00015887		594.953	553.419	532.26	337.928	184.191	208.117	301.883	262.784		371.942	1.07794	0.211489	5.09691	3.4524e-07	6.63782e-06
WBGene00003465		20.2496	10.3443	24.407	13.6431	6.612	5.72798	8.96681	11.5625		12.6892	1.076	0.486559	2.21144	0.0270056	0.073751
WBGene00007399		0	4.13771	0	2.09893	0.944571	0.954664	0.996312	0		1.14152	1.07592	1.66159	0.647524	0.517293	NA
WBGene00016942		25.0709	19.6541	18.7746	32.5335	9.44571	8.59198	13.9484	13.6648		17.7105	1.07561	0.402043	2.67536	0.00746494	0.0274602
WBGene00013556		8.6784	4.13771	4.69365	3.1484	2.83371	1.90933	2.98894	2.10227		3.81155	1.0755	0.806875	1.33292	0.182559	NA
WBGene00014852		27.9637	33.1017	28.1619	19.9399	12.2794	20.0479	12.9521	6.30682		20.0942	1.07473	0.401528	2.6766	0.00743743	0.0273788
WBGene00017322		422.349	366.187	487.201	295.95	199.304	183.295	187.307	177.642		289.905	1.07281	0.172053	6.23534	4.50786e-10	1.80622e-08
WBGene00007448		7.71414	3.10328	7.50984	2.09893	3.77828	2.86399	0.996312	2.10227		3.77088	1.07088	0.851114	1.25822	0.208314	NA
WBGene00001777		26.0352	36.205	25.3457	22.0388	13.224	13.3653	13.9484	11.5625		20.2156	1.07078	0.364217	2.93995	0.0032827	0.0143929
WBGene00012564		308.565	336.189	341.698	302.247	137.907	136.517	160.406	179.744		237.909	1.0705	0.14643	7.31066	2.6583e-13	2.11363e-11
WBGene00014301		0	4.13771	0	0	0	1.90933	0	0		0.75588	1.07033	2.56911	0.416616	0.676959	NA
WBGene00016288		5.7856	1.03443	8.44858	1.04947	3.77828	0	2.98894	1.05114		3.01705	1.06939	1.08739	0.983452	0.325385	NA
WBGene00018174		314.351	366.187	300.394	494.299	154.91	129.834	175.351	243.864		272.399	1.06826	0.223985	4.76934	1.84826e-06	2.78535e-05
WBGene00014668		7.71414	4.13771	7.50984	11.5441	4.72285	3.81866	2.98894	3.15341		5.69871	1.06762	0.669094	1.59561	0.110575	0.213675
WBGene00007910		7.71414	10.3443	5.63238	7.34627	5.66743	2.86399	0.996312	5.25568		5.72756	1.06754	0.686677	1.55465	0.120031	0.226752
WBGene00011979		1136.87	1338.55	1040.11	1970.9	620.583	819.102	470.259	707.415		1012.97	1.06748	0.221265	4.82446	1.40383e-06	2.19579e-05
WBGene00206355		17.3568	15.5164	18.7746	13.6431	13.224	8.59198	5.97787	3.15341		12.0298	1.06682	0.495113	2.1547	0.031185	0.0822654
WBGene00010919		15.4283	19.6541	25.3457	19.9399	8.50114	11.456	6.97418	11.5625		14.8577	1.06477	0.422806	2.51833	0.0117911	0.039225
WBGene00009942		2.8928	7.24099	12.2035	6.2968	2.83371	6.68265	0.996312	3.15341		5.28752	1.06417	0.764506	1.39198	0.163929	0.285118
WBGene00011610		39.535	32.0673	33.7943	45.1271	14.1686	21.9573	13.9484	22.0739		27.834	1.06237	0.324187	3.27703	0.00104904	0.00571746
WBGene00015639		10.6069	6.20657	5.63238	2.09893	2.83371	2.86399	2.98894	3.15341		4.54811	1.05953	0.765007	1.38499	0.166056	0.287613
WBGene00045415		22.1781	33.1017	26.2845	12.5936	8.50114	9.54664	19.9262	7.35796		17.4362	1.05587	0.461881	2.28602	0.0222529	0.0635572
WBGene00000731		51.1062	105.512	39.4267	64.0175	31.1708	21.0026	25.9041	47.3012		48.1801	1.05367	0.358559	2.93863	0.00329663	0.0144409
WBGene00017851		26.9995	12.4131	30.9781	17.8409	12.2794	3.81866	10.9594	15.7671		16.382	1.05364	0.482268	2.18475	0.0289071	0.0777203
WBGene00044917		0	0	0.938731	3.1484	0.944571	0.954664	0	0		0.748296	1.05245	2.04246	0.515287	0.606353	NA
WBGene00220030		0	1.03443	0.938731	2.09893	1.88914	0	0	0		0.745154	1.05149	2.01491	0.521854	0.601772	NA
WBGene00021398		26.9995	9.30985	19.7133	13.6431	13.224	1.90933	3.98525	14.7159		12.9375	1.05033	0.60127	1.74686	0.0806618	0.169053
WBGene00005058		6.74987	9.30985	10.326	8.39574	2.83371	3.81866	4.98156	5.25568		6.45889	1.04958	0.612623	1.71326	0.0866647	0.178449
WBGene00010004		21.2139	7.24099	22.5295	9.4452	9.44571	7.63731	8.96681	3.15341		11.2041	1.04938	0.559622	1.87516	0.0607711	0.136213
WBGene00005959		0.964267	3.10328	0	0	0.944571	0.954664	0	0		0.745848	1.04788	2.04337	0.512817	0.608079	NA
WBGene00021990		0.964267	3.10328	0	0	0.944571	0.954664	0	0		0.745848	1.04788	2.04337	0.512817	0.608079	NA
WBGene00014771		0	1.03443	2.81619	6.2968	1.88914	1.90933	0	1.05114		1.87463	1.0476	1.31381	0.797375	0.425233	NA
WBGene00235258		0	1.03443	0.938731	2.09893	0.944571	0.954664	0	0		0.746416	1.04522	1.86516	0.560389	0.575214	NA
WBGene00235298		0	1.03443	0.938731	2.09893	0.944571	0.954664	0	0		0.746416	1.04522	1.86516	0.560389	0.575214	NA
WBGene00015950		16.3925	5.17214	6.57111	16.7915	4.72285	3.81866	6.97418	6.30682		8.34372	1.04482	0.60991	1.71307	0.0866996	0.178497
WBGene00018602		4467.45	3120.87	4605.41	2441.06	1825.86	1830.09	2057.38	1383.3		2716.43	1.04423	0.206318	5.06129	4.16437e-07	7.79511e-06
WBGene00003431		26.9995	10.3443	34.733	13.6431	10.3903	4.77332	9.96312	16.8182		15.9581	1.04394	0.517706	2.01646	0.0437517	0.106593
WBGene00044028		3.85707	1.03443	0	3.1484	1.88914	0.954664	0.996312	0		1.485	1.04357	1.39409	0.748568	0.454118	NA
WBGene00013837		46.2848	32.0673	61.9562	22.0388	23.6143	26.7306	19.9262	8.4091		30.1284	1.04314	0.413714	2.52141	0.0116886	0.0389687
WBGene00021728		0	0	0.938731	3.1484	0.944571	0	0.996312	0		0.753502	1.04275	2.03855	0.511517	0.608989	NA
WBGene00013044		0.964267	1.03443	0	2.09893	0.944571	0	0.996312	0		0.754814	1.04271	1.86109	0.56027	0.575295	NA
WBGene00020574		39.535	36.205	59.14	28.3356	23.6143	22.9119	14.9447	17.8693		30.3195	1.04154	0.339698	3.06607	0.00216892	0.0103406
WBGene00022143		0	5.17214	1.87746	1.04947	0.944571	0.954664	1.99262	0		1.49887	1.04116	1.41213	0.737302	0.460939	NA
WBGene00017262		697.165	523.42	835.47	870.008	463.784	385.684	222.178	350.029		543.467	1.04103	0.225655	4.61338	3.96166e-06	5.31915e-05
WBGene00015780		520.704	522.386	548.219	618.136	224.808	188.069	292.916	368.949		410.523	1.04102	0.197472	5.27175	1.3513e-07	2.96819e-06
WBGene00021484		0.964267	2.06886	2.81619	6.2968	2.83371	0.954664	0.996312	1.05114		2.24774	1.03928	1.08312	0.959527	0.337293	NA
WBGene00022548		31.8208	24.8263	42.2429	22.0388	13.224	17.184	13.9484	14.7159		22.5001	1.03829	0.363308	2.85789	0.00426472	0.0176437
WBGene00019963		267.102	265.848	216.847	528.931	152.076	130.789	145.462	194.46		237.689	1.03772	0.264612	3.92168	8.79355e-05	0.000741261
WBGene00016820		0	1.03443	0.938731	2.09893	0.944571	0	0.996312	0		0.751622	1.03654	1.86191	0.556709	0.577726	NA
WBGene00010050		1918.89	2366.77	2334.62	2589.04	1136.32	1394.76	971.404	992.273		1713.01	1.03452	0.15122	6.84115	7.85596e-12	4.70408e-10
WBGene00020990		32.7851	7.24099	40.3654	16.7915	5.66743	11.456	15.941	14.7159		18.1204	1.03393	0.534873	1.93304	0.053231	0.122957
WBGene00014884		31.8208	22.7574	22.5295	17.8409	8.50114	11.456	11.9557	14.7159		17.6972	1.03377	0.396247	2.60891	0.00908324	0.031921
WBGene00020167		120.533	124.131	130.484	130.134	49.1177	49.6425	64.7603	84.091		94.1117	1.03371	0.212144	4.8727	1.10081e-06	1.8031e-05
WBGene00019178		0.964267	0	2.81619	2.09893	2.83371	0	0	0		1.08914	1.0337	1.78868	0.577912	0.563324	NA
WBGene00197975		0	2.06886	0.938731	1.04947	0.944571	0	0.996312	0		0.749742	1.03313	1.86242	0.554723	0.579084	NA
WBGene00003363		1.92853	1.03443	0	1.04947	0.944571	0.954664	0	0		0.738958	1.03153	1.86724	0.552438	0.580648	NA
WBGene00023395		1.92853	1.03443	0.938731	2.09893	0.944571	0.954664	0.996312	0		1.11202	1.03078	1.43602	0.717804	0.472878	NA
WBGene00008632		3.85707	6.20657	7.50984	14.6925	5.66743	3.81866	0.996312	5.25568		6.00051	1.02931	0.716877	1.43583	0.15105	0.268694
WBGene00005421		3.85707	4.13771	3.75492	2.09893	4.72285	0	1.99262	0		2.57051	1.02926	1.09743	0.937877	0.348308	NA
WBGene00012130		310.494	378.601	317.291	291.752	158.688	152.746	149.447	175.54		241.82	1.02893	0.145754	7.05938	1.67245e-12	1.15143e-10
WBGene00012414		0.964267	0	0.938731	2.09893	0.944571	0.954664	0	0		0.737646	1.02876	1.86757	0.550851	0.581736	NA
WBGene00006695		31.8208	31.0328	27.2232	26.2367	18.8914	11.456	13.9484	12.6136		21.6529	1.02869	0.348747	2.94966	0.0031812	0.0140359
WBGene00013329		20.2496	20.6886	23.4683	24.1377	7.55657	9.54664	16.9373	9.46023		16.5056	1.02779	0.406987	2.52537	0.0115577	0.0386675
WBGene00019337		29.8923	34.1361	25.3457	20.9893	16.0577	10.5013	13.9484	13.6648		20.567	1.02685	0.363895	2.82183	0.00477511	0.0193353
WBGene00013052		0.964267	2.06886	0	3.1484	0	0	1.99262	1.05114		1.15316	1.02665	1.61992	0.633768	0.526232	NA
WBGene00011053		3.85707	2.06886	1.87746	0	2.83371	0.954664	0	0		1.44897	1.02565	1.48274	0.691726	0.489109	NA
WBGene00008899		0.964267	4.13771	0.938731	0	0	1.90933	0	1.05114		1.12515	1.02538	1.66212	0.616909	0.537294	NA
WBGene00006688		14.464	2.06886	11.2648	6.2968	3.77828	2.86399	3.98525	6.30682		6.3786	1.02508	0.707471	1.44894	0.147355	0.263905
WBGene00235292		6.74987	13.4476	10.326	7.34627	6.612	4.77332	4.98156	2.10227		7.04236	1.02506	0.612868	1.67256	0.0944138	0.189916
WBGene00219750		4.82134	1.03443	0.938731	3.1484	0.944571	1.90933	1.99262	0		1.84868	1.02495	1.2067	0.849383	0.395668	NA
WBGene00006256		1.92853	1.03443	1.87746	1.04947	0	2.86399	0	0		1.09424	1.02438	1.6266	0.62977	0.528845	NA
WBGene00235314		0.964267	4.13771	1.87746	1.04947	0.944571	0	2.98894	0		1.4953	1.02389	1.39355	0.734734	0.462502	NA
WBGene00012088		0.964267	1.03443	0.938731	1.04947	0	1.90933	0	0		0.737028	1.02234	1.86762	0.547401	0.584104	NA
WBGene00008529		3.85707	3.10328	11.2648	9.4452	5.66743	3.81866	2.98894	1.05114		5.14956	1.02233	0.765397	1.33568	0.181653	0.30751
WBGene00010246		1.92853	4.13771	6.57111	7.34627	2.83371	2.86399	1.99262	2.10227		3.72203	1.02205	0.824306	1.2399	0.215014	NA
WBGene00045048		13.4997	18.6197	22.5295	23.0883	11.3349	12.4106	5.97787	8.4091		14.4837	1.02138	0.437574	2.33419	0.019586	0.0575965
WBGene00005061		3.85707	8.27542	4.69365	3.1484	1.88914	4.77332	0	3.15341		3.7238	1.02098	0.883146	1.15607	0.247652	NA
WBGene00005113		7.71414	12.4131	5.63238	8.39574	4.72285	1.90933	5.97787	4.20455		6.37125	1.02057	0.641979	1.58972	0.111898	0.215496
WBGene00206388		13.4997	26.8951	19.7133	30.4345	14.1686	7.63731	4.98156	17.8693		16.8999	1.02018	0.471401	2.16416	0.0304524	0.0807914
WBGene00008539		0.964267	0	0.938731	2.09893	0.944571	0	0.996312	0		0.742852	1.0201	1.86428	0.547182	0.584254	NA
WBGene00206469		3.85707	5.17214	1.87746	1.04947	2.83371	0	1.99262	1.05114		2.2292	1.01985	1.11219	0.916976	0.359155	NA
WBGene00016196		4.82134	3.10328	1.87746	0	1.88914	1.90933	0.996312	0		1.82461	1.01985	1.26451	0.806512	0.419948	NA
WBGene00016714		74.2486	67.2378	55.3851	123.837	25.5034	38.1866	36.8635	57.8125		59.8843	1.01981	0.32078	3.17915	0.00147708	0.00752891
WBGene00016336		13.4997	18.6197	16.8972	10.4947	8.50114	8.59198	8.96681	3.15341		11.0906	1.01954	0.498546	2.04504	0.0408512	0.101404
WBGene00010612		2.8928	1.03443	5.63238	4.19787	3.77828	1.90933	0	1.05114		2.56203	1.0193	1.05984	0.961748	0.336176	NA
WBGene00008941		1.92853	1.03443	0	1.04947	0	0.954664	0.996312	0		0.745426	1.01918	1.86356	0.546899	0.584448	NA
WBGene00016798		1.92853	1.03443	0	1.04947	0	0.954664	0.996312	0		0.745426	1.01918	1.86356	0.546899	0.584448	NA
WBGene00001944		1.92853	1.03443	0	1.04947	0	0.954664	0	1.05114		0.752279	1.01917	1.86081	0.547704	0.583895	NA
WBGene00013586		1.92853	5.17214	3.75492	1.04947	1.88914	1.90933	0.996312	1.05114		2.21887	1.01889	1.05458	0.966157	0.333966	NA
WBGene00000707		13.4997	18.6197	13.1422	22.0388	9.44571	0	3.98525	19.9716		12.5879	1.01859	0.686536	1.48367	0.137897	0.25113
WBGene00012398		54.9632	27.9295	70.4048	6.2968	28.3371	14.32	30.8857	5.25568		29.7991	1.01858	0.609524	1.67111	0.0947007	0.190299
WBGene00013507		33.7494	33.1017	30.9781	19.9399	13.224	14.32	12.9521	17.8693		22.0168	1.01826	0.355661	2.863	0.00419655	0.0174325
WBGene00013947		414.635	374.463	264.722	374.66	144.519	138.426	176.347	247.017		266.849	1.01758	0.214007	4.75488	1.98568e-06	2.95452e-05
WBGene00015108		3.85707	5.17214	1.87746	1.04947	0.944571	1.90933	1.99262	1.05114		2.23172	1.01702	1.0552	0.963812	0.33514	NA
WBGene00011187		4.82134	1.03443	1.87746	0	2.83371	0.954664	0	0		1.4402	1.01686	1.53007	0.664583	0.506317	NA
WBGene00020797		132.105	127.235	111.709	120.689	67.0645	60.1438	58.7824	56.7614		91.8111	1.01667	0.183839	5.53021	3.19854e-08	8.29014e-07
WBGene00007796		5.7856	2.06886	4.69365	1.04947	4.72285	0.954664	0.996312	0		2.53393	1.01564	1.11242	0.913004	0.36124	NA
WBGene00022094		2.8928	0	0	1.04947	0.944571	0.954664	0	0		0.730188	1.01536	2.04905	0.495526	0.620229	NA
WBGene00006058		6.74987	7.24099	2.81619	3.1484	3.77828	0.954664	1.99262	3.15341		3.72931	1.01522	0.836914	1.21306	0.225108	NA
WBGene00000640		3.85707	8.27542	7.50984	2.09893	4.72285	1.90933	1.99262	2.10227		4.05854	1.01508	0.817331	1.24194	0.214259	0.347044
WBGene00015097		12.5355	12.4131	7.50984	7.34627	2.83371	6.68265	5.97787	4.20455		7.43794	1.01455	0.591231	1.71599	0.086164	0.177778
WBGene00194670		3.85707	2.06886	1.87746	0	1.88914	0.954664	0.996312	0		1.45544	1.01379	1.36974	0.740129	0.459222	NA
WBGene00014085		4.82134	3.10328	3.75492	0	1.88914	2.86399	0.996312	0		2.17862	1.01354	1.18365	0.856276	0.391845	NA
WBGene00016180		139.819	57.928	116.403	49.325	44.3948	61.0985	36.8635	37.8409		67.959	1.01335	0.345718	2.93114	0.00337726	0.0146719
WBGene00003449		13.4997	5.17214	18.7746	6.2968	4.72285	2.86399	6.97418	7.35796		8.20779	1.01299	0.62751	1.61429	0.106464	0.207932
WBGene00003468		4.82134	3.10328	3.75492	6.2968	1.88914	0.954664	3.98525	2.10227		3.36346	1.01271	0.856586	1.18227	0.237101	NA
WBGene00016058		3.85707	0	5.63238	4.19787	0.944571	3.81866	1.99262	0		2.5554	1.01252	1.14388	0.885163	0.376069	NA
WBGene00019131		127.283	146.889	126.729	159.519	70.8428	55.3705	68.7455	83.0398		104.802	1.01238	0.193706	5.22639	1.72853e-07	3.66119e-06
WBGene00012012		2.8928	3.10328	3.75492	2.09893	0	3.81866	0.996312	1.05114		2.21451	1.01236	1.09361	0.925703	0.3546	NA
WBGene00004966		0	1.03443	2.81619	2.09893	0.944571	0.954664	0	1.05114		1.11249	1.01226	1.52742	0.662725	0.507507	NA
WBGene00000723		35.6779	25.8607	30.9781	117.54	24.5588	21.0026	25.9041	32.5852		39.2635	1.01223	0.457297	2.21351	0.0268628	0.0735319
WBGene00219727		3.85707	3.10328	4.69365	2.09893	0.944571	2.86399	2.98894	0		2.5688	1.01194	1.00918	1.00273	0.315991	NA
WBGene00044261		0.964267	1.03443	0.938731	3.1484	0	0	1.99262	1.05114		1.1412	1.01151	1.52435	0.663564	0.506969	NA
WBGene00009471		1.92853	2.06886	1.87746	4.19787	0.944571	0	1.99262	2.10227		1.88902	1.01026	1.15177	0.877131	0.380415	NA
WBGene00050910		0.964267	2.06886	0.938731	0	0	0.954664	0	1.05114		0.747207	1.00955	1.86218	0.542137	0.587724	NA
WBGene00199691		0.964267	2.06886	0.938731	0	0	0.954664	0.996312	0		0.740354	1.00954	1.86496	0.541323	0.588285	NA
WBGene00013547		0.964267	4.13771	5.63238	1.04947	1.88914	1.90933	0.996312	1.05114		2.20372	1.00951	1.08949	0.926583	0.354143	NA
WBGene00044435		21.2139	15.5164	6.57111	10.4947	9.44571	2.86399	3.98525	10.5114		10.0753	1.0092	0.59132	1.70669	0.0878798	0.18027
WBGene00004810		392.457	370.325	535.076	309.593	227.642	247.258	174.355	149.261		300.746	1.00884	0.212125	4.75588	1.97588e-06	2.94568e-05
WBGene00219294		0.964267	2.06886	4.69365	4.19787	0.944571	1.90933	0.996312	2.10227		2.23464	1.00839	1.055	0.955816	0.339165	NA
WBGene00005098		0.964267	1.03443	1.87746	2.09893	0.944571	0	0.996312	1.05114		1.12089	1.00745	1.43371	0.702691	0.482248	NA
WBGene00044147		0.964267	3.10328	0.938731	1.04947	0	0	1.99262	1.05114		1.13744	1.00694	1.52456	0.660478	0.508947	NA
WBGene00007169		2.8928	2.06886	3.75492	3.1484	2.83371	0	0.996312	2.10227		2.22466	1.00621	1.06507	0.944733	0.344795	NA
WBGene00005842		2.8928	0	0	1.04947	0.944571	0	0	1.05114		0.742247	1.0057	2.04124	0.492691	0.622231	NA
WBGene00010580		15.4283	7.24099	6.57111	6.2968	3.77828	4.77332	3.98525	5.25568		6.66622	1.00453	0.630886	1.59226	0.111327	0.214674
WBGene00016797		50.1419	35.1705	39.4267	157.42	36.8383	33.4132	20.9226	49.4034		52.8421	1.00407	0.456982	2.19717	0.0280081	0.0758107
WBGene00013651		1.92853	1.03443	1.87746	1.04947	0.944571	0.954664	0	1.05114		1.10503	1.00403	1.43529	0.699532	0.48422	NA
WBGene00020635		2.8928	4.13771	7.50984	7.34627	0.944571	1.90933	4.98156	3.15341		4.10944	1.00389	0.81069	1.23832	0.215598	0.34851
WBGene00014155		15.4283	20.6886	17.8359	7.34627	3.77828	8.59198	10.9594	7.35796		11.4983	1.0038	0.519947	1.93059	0.0535341	0.123452
WBGene00045362		0.964267	0	1.87746	1.04947	0.944571	0.954664	0	0		0.723804	1.00252	1.87156	0.535658	0.592195	NA
WBGene00219308		8.6784	10.3443	14.081	0	4.72285	5.72798	3.98525	2.10227		6.20525	1.0014	0.805091	1.24383	0.213561	0.346316
WBGene00005211		0.964267	1.03443	1.87746	0	1.88914	0	0	0		0.720662	1.00128	2.02377	0.494758	0.620771	NA
WBGene00007282		1514.86	1236.14	1342.38	915.135	546.907	599.529	747.234	610.711		939.113	1.00034	0.170837	5.85553	4.75486e-09	1.54442e-07
WBGene00003906		1.92853	0	0.938731	1.04947	0.944571	0	0	1.05114		0.739055	1.00017	1.86432	0.536481	0.591626	NA
WBGene00044113		1.92853	0	0.938731	1.04947	0.944571	0	0.996312	0		0.732202	1.00014	1.8673	0.535609	0.592229	NA
WBGene00050896		1.92853	0	0.938731	1.04947	0.944571	0	0.996312	0		0.732202	1.00014	1.8673	0.535609	0.592229	NA
WBGene00014158		19.2853	5.17214	22.5295	15.742	7.55657	8.59198	6.97418	8.4091		11.7826	0.998337	0.5234	1.90741	0.0564678	0.128797
WBGene00015032		0.964267	1.03443	0.938731	1.04947	0	0	1.99262	0		0.74744	0.998285	1.86278	0.535912	0.592019	NA
WBGene00007454		98.3553	112.753	103.26	118.59	46.284	50.5972	78.7087	40.9943		81.1928	0.998139	0.233749	4.27012	1.95365e-05	0.00020891
WBGene00008299		1.92853	1.03443	2.81619	0	0.944571	0.954664	0.996312	0		1.08434	0.997996	1.53019	0.652206	0.514268	NA
WBGene00197147		1.92853	1.03443	0.938731	0	0.944571	0	0	1.05114		0.737175	0.99673	1.86486	0.534479	0.59301	NA
WBGene00173534		1.92853	1.03443	0.938731	0	0.944571	0	0.996312	0		0.730322	0.996696	1.86786	0.533604	0.593616	NA
WBGene00019151		3.85707	4.13771	7.50984	2.09893	2.83371	1.90933	0.996312	3.15341		3.31204	0.996466	0.874966	1.13886	0.25476	NA
WBGene00021650		3.85707	1.03443	1.87746	1.04947	0	0.954664	2.98894	0		1.47025	0.995572	1.39305	0.71467	0.474813	NA
WBGene00008912		4.82134	4.13771	6.57111	4.19787	3.77828	0.954664	0	5.25568		3.71458	0.995234	0.890082	1.11814	0.263508	NA
WBGene00018065		3.85707	1.03443	1.87746	1.04947	0	1.90933	0.996312	1.05114		1.4719	0.995154	1.30448	0.762874	0.445539	NA
WBGene00019431		2.8928	1.03443	5.63238	4.19787	0.944571	2.86399	0	3.15341		2.58993	0.994884	1.05103	0.946575	0.343855	NA
WBGene00006399		0	0	2.81619	1.04947	0.944571	0.954664	0	0		0.720612	0.994769	2.05264	0.484629	0.62794	NA
WBGene00195459		0.964267	1.03443	1.87746	0	0	1.90933	0	0		0.723185	0.994685	2.02196	0.491942	0.62276	NA
WBGene00012827		2.8928	3.10328	6.57111	1.04947	2.83371	0.954664	0.996312	2.10227		2.56295	0.993941	1.00836	0.985696	0.324282	NA
WBGene00007382		0.964267	0	1.87746	1.04947	0.944571	0	0.996312	0		0.72901	0.993901	1.86821	0.532007	0.594721	NA
WBGene00011407		149.461	170.681	146.442	265.515	99.18	64.9171	80.7013	122.983		137.485	0.99351	0.254731	3.90023	9.61019e-05	0.000795603
WBGene00050971		0	1.03443	2.81619	0	1.88914	0	0	0		0.71747	0.993037	2.26595	0.438243	0.66121	NA
WBGene00007319		2.8928	0	5.63238	3.1484	1.88914	1.90933	0	2.10227		2.19679	0.992784	1.17405	0.845606	0.397772	NA
WBGene00009866		1.92853	0	3.75492	2.09893	0.944571	0.954664	0.996312	1.05114		1.46613	0.99253	1.30445	0.76088	0.446728	NA
WBGene00008827		3.85707	3.10328	4.69365	0	0.944571	0.954664	3.98525	0		2.19231	0.992142	1.22026	0.813056	0.416186	NA
WBGene00003426		40.4992	21.723	43.1816	24.1377	11.3349	12.4106	23.9115	17.8693		24.3835	0.992058	0.389843	2.54477	0.0109351	0.0369899
WBGene00011009		17.3568	5.17214	13.1422	7.34627	4.72285	4.77332	4.98156	7.35796		8.10664	0.991166	0.598218	1.65686	0.0975472	0.194635
WBGene00044450		0.964267	1.03443	1.87746	0	0.944571	0	0.996312	0		0.72713	0.990447	1.86878	0.529998	0.596113	NA
WBGene00202231		0.964267	1.03443	1.87746	0	0.944571	0	0.996312	0		0.72713	0.990447	1.86878	0.529998	0.596113	NA
WBGene00014069		4.82134	1.03443	4.69365	5.24734	0	1.90933	2.98894	3.15341		2.98105	0.990406	0.976497	1.01424	0.310466	NA
WBGene00002010		13291.5	15623	11652.5	16926.9	5911.13	6049.71	7851.94	9128.07		10804.3	0.990328	0.174331	5.68074	1.34116e-08	3.83411e-07
WBGene00194783		0.964267	0	1.87746	1.04947	0	0.954664	0	1.05114		0.737125	0.990248	1.86497	0.530972	0.595438	NA
WBGene00020468		0	0	2.81619	1.04947	0	1.90933	0	0		0.721873	0.9899	2.26239	0.437546	0.661716	NA
WBGene00009463		3.85707	2.06886	1.87746	2.09893	0	1.90933	0	3.15341		1.87063	0.98954	1.22361	0.808704	0.418686	NA
WBGene00007885		144.64	118.959	120.158	109.145	56.6743	62.0532	63.764	66.2216		92.7018	0.989141	0.189773	5.21223	1.86584e-07	3.90725e-06
WBGene00007307		24.1067	8.27542	20.6521	7.34627	5.66743	10.5013	4.98156	9.46023		11.3739	0.989029	0.559108	1.76894	0.0769039	0.162809
WBGene00086568		16.3925	16.5508	19.7133	11.5441	7.55657	8.59198	10.9594	5.25568		12.0706	0.988391	0.465378	2.12385	0.033683	0.0871829
WBGene00001968		0.964267	3.10328	3.75492	0	0.944571	0	1.99262	1.05114		1.47635	0.987743	1.3926	0.70928	0.478151	NA
WBGene00006097		4.82134	3.10328	7.50984	0	3.77828	0.954664	0.996312	2.10227		2.90825	0.987367	1.04728	0.942788	0.34579	NA
WBGene00006051		40.4992	16.5508	53.5076	28.3356	16.0577	9.54664	25.9041	18.9205		26.1653	0.986976	0.427906	2.30652	0.0210814	0.0609754
WBGene00008001		0.964267	1.03443	1.87746	0	0	0.954664	0	1.05114		0.735245	0.986801	1.86552	0.528967	0.596828	NA
WBGene00015084		0.964267	1.03443	1.87746	0	0	0.954664	0	1.05114		0.735245	0.986801	1.86552	0.528967	0.596828	NA
WBGene00001694		923.768	1034.43	878.652	1798.79	570.521	461.103	537.012	771.535		871.976	0.9862	0.237181	4.15801	3.21034e-05	0.00031824
WBGene00010869		5.7856	5.17214	7.50984	3.1484	1.88914	1.90933	0.996312	6.30682		4.0897	0.984647	0.819317	1.20179	0.229445	0.365093
WBGene00022102		1.92853	2.06886	6.57111	1.04947	2.83371	0	0.996312	2.10227		2.19378	0.984475	1.14578	0.859218	0.39022	NA
WBGene00000711		1.92853	8.27542	9.38731	18.8904	14.1686	0.954664	0	4.20455		7.22618	0.983959	0.940235	1.0465	0.295328	0.436657
WBGene00011202		46.2848	49.6525	61.0175	43.0282	29.2817	24.8213	22.9152	24.1762		37.6472	0.983115	0.273877	3.58963	0.00033115	0.00225519
WBGene00044810		2.8928	1.03443	0.938731	1.04947	0	0.954664	0	2.10227		1.12155	0.982436	1.5252	0.644135	0.519488	NA
WBGene00017490		2.8928	10.3443	7.50984	12.5936	2.83371	3.81866	5.97787	4.20455		6.27191	0.982265	0.673182	1.45914	0.144527	0.260153
WBGene00011425		5.7856	3.10328	1.87746	1.04947	0.944571	0	1.99262	3.15341		2.2383	0.981755	1.1235	0.873835	0.382208	NA
WBGene00194816		3.85707	1.03443	4.69365	0	0.944571	1.90933	0.996312	1.05114		1.81081	0.981683	1.23533	0.794675	0.426802	NA
WBGene00022541		1.92853	0	0.938731	1.04947	0	0	0.996312	1.05114		0.745523	0.981473	1.86304	0.526813	0.598324	NA
WBGene00044439		0	1.03443	2.81619	0	0.944571	0	0.996312	0		0.723938	0.98127	2.04929	0.478834	0.632057	NA
WBGene00045511		18.3211	19.6541	12.2035	11.5441	13.224	7.63731	5.97787	4.20455		11.5958	0.981036	0.504804	1.9434	0.0519677	0.120957
WBGene00047835		1.92853	0	1.87746	0	1.88914	0	0	0		0.711892	0.980766	2.23637	0.438553	0.660986	NA
WBGene00006047		5.7856	2.06886	4.69365	1.04947	0.944571	1.90933	0.996312	3.15341		2.57515	0.980757	1.01075	0.970324	0.331885	NA
WBGene00005146		2.8928	0	0.938731	0	0	1.90933	0	0		0.717607	0.9806	2.26507	0.432922	0.665071	NA
WBGene00017703		17.3568	49.6525	21.5908	230.883	16.0577	18.1386	26.9004	100.909		60.1861	0.980208	1.00875	0.971704	0.331198	0.474036
WBGene00000636		5.7856	8.27542	3.75492	7.34627	3.77828	4.77332	2.98894	1.05114		4.71924	0.979969	0.736888	1.32988	0.183559	0.310151
WBGene00018528		1.92853	0	1.87746	0	0.944571	0.954664	0	0		0.713154	0.979779	2.0259	0.483627	0.628651	NA
WBGene00018135		4.82134	1.03443	11.2648	4.19787	0.944571	4.77332	0.996312	4.20455		4.02964	0.979675	0.914833	1.07088	0.284224	0.425556
WBGene00007156		5.7856	1.03443	3.75492	1.04947	0.944571	0.954664	1.99262	2.10227		2.20232	0.979379	1.08874	0.89955	0.36836	NA
WBGene00019834		0	3.10328	2.81619	0	0	0	1.99262	1.05114		1.1204	0.978795	1.78296	0.548971	0.583026	NA
WBGene00015241		1.92853	0	0.938731	1.04947	0	0	1.99262	0		0.73867	0.978441	2.01428	0.485752	0.627143	NA
WBGene00001839		7.71414	2.06886	15.9584	5.24734	1.88914	4.77332	3.98525	5.25568		5.86152	0.97816	0.748978	1.30599	0.191555	0.320188
WBGene00012671		2.8928	14.482	13.1422	8.39574	3.77828	3.81866	7.9705	4.20455		7.33559	0.977634	0.654946	1.49269	0.135517	0.24785
WBGene00019534		7.71414	4.13771	11.2648	2.09893	4.72285	1.90933	0	6.30682		4.76932	0.977347	0.874019	1.11822	0.263472	0.403468
WBGene00017473		9.64267	16.5508	10.326	34.6324	2.83371	6.68265	10.9594	15.7671		13.4244	0.977104	0.591669	1.65144	0.0986496	0.196194
WBGene00019891		0	1.03443	2.81619	0	0	0.954664	0	1.05114		0.732053	0.977052	2.04517	0.477736	0.632838	NA
WBGene00008124		2.8928	0	0.938731	0	0.944571	0	0	1.05114		0.728405	0.976692	2.04636	0.477282	0.633161	NA
WBGene00010779		15.4283	12.4131	8.44858	4.19787	6.612	4.77332	4.98156	4.20455		7.63241	0.976461	0.606894	1.60895	0.107628	0.209598
WBGene00006630		2.8928	0	1.87746	1.04947	0	0	2.98894	0		1.10108	0.976288	1.78576	0.546706	0.584581	NA
WBGene00200706		1.92853	1.03443	2.81619	0	0.944571	0	0.996312	1.05114		1.0964	0.975704	1.52775	0.638655	0.523047	NA
WBGene00021716		8.6784	6.20657	6.57111	9.4452	5.66743	3.81866	2.98894	3.15341		5.81621	0.975672	0.643589	1.51599	0.129523	0.240225
WBGene00011438		1.92853	0	2.81619	1.04947	0	0.954664	0.996312	1.05114		1.09954	0.975532	1.52737	0.6387	0.523018	NA
WBGene00044911		0.964267	0	4.69365	0	0.944571	0.954664	0.996312	0		1.06918	0.975111	1.71313	0.569197	0.569222	NA
WBGene00009550		0.964267	0	1.87746	1.04947	0	0	1.99262	0		0.735477	0.971668	2.01541	0.482119	0.629721	NA
WBGene00008772		1.92853	0	1.87746	0	0.944571	0	0	1.05114		0.725213	0.97038	2.01787	0.480894	0.630592	NA
WBGene00008483		46.2848	41.3771	35.6718	37.7808	24.5588	26.7306	15.941	14.7159		30.3826	0.96908	0.313646	3.08973	0.00200341	0.00970306
WBGene00004209		6.74987	1.03443	0.938731	1.04947	0.944571	0	0.996312	3.15341		1.85835	0.968978	1.29179	0.750105	0.453192	NA
WBGene00013170		3.85707	0	3.75492	0	0.944571	0.954664	0.996312	1.05114		1.44483	0.968283	1.42828	0.677937	0.497812	NA
WBGene00016707		0.964267	4.13771	4.69365	0	0	0.954664	0.996312	3.15341		1.8625	0.968064	1.32462	0.730825	0.464886	NA
WBGene00007472		5.7856	8.27542	7.50984	5.24734	3.77828	4.77332	2.98894	2.10227		5.05763	0.967251	0.687777	1.40634	0.159622	0.279769
WBGene00007354		4.82134	11.3787	6.57111	4.19787	4.72285	1.90933	3.98525	3.15341		5.09248	0.966574	0.716244	1.3495	0.177175	0.301368
WBGene00009148		7.71414	6.20657	9.38731	11.5441	2.83371	3.81866	4.98156	6.30682		6.59911	0.966464	0.614691	1.57228	0.115886	0.221477
WBGene00020988		24.1067	27.9295	37.5492	46.1766	12.2794	10.5013	25.9041	21.0227		25.6837	0.966159	0.385723	2.5048	0.0122521	0.0403538
WBGene00010705		39.535	37.2394	30.0394	48.2755	16.0577	12.4106	24.9078	26.2784		29.343	0.965434	0.337542	2.86019	0.00423386	0.0175398
WBGene00018955		226.603	293.777	260.028	239.278	125.628	114.56	158.414	124.034		192.79	0.9644	0.165225	5.83689	5.31833e-09	1.69853e-07
WBGene00008612		14.464	5.17214	9.38731	3.1484	6.612	4.77332	2.98894	2.10227		6.08105	0.963505	0.712023	1.35319	0.175994	0.299958
WBGene00018465		133.069	112.753	130.484	125.936	77.4548	56.3252	60.775	63.0682		94.983	0.962909	0.188731	5.10201	3.3607e-07	6.49424e-06
WBGene00020414		28.928	14.482	26.2845	11.5441	5.66743	4.77332	17.9336	13.6648		15.4097	0.962899	0.521016	1.84812	0.0645855	0.14248
WBGene00011472		0.964267	0	2.81619	0	0.944571	0	0	1.05114		0.722021	0.96287	2.04878	0.469973	0.638374	NA
WBGene00013523		0.964267	0	2.81619	0	0.944571	0	0	1.05114		0.722021	0.96287	2.04878	0.469973	0.638374	NA
WBGene00007366		399.207	375.497	326.678	20.9893	112.404	165.157	172.362	126.136		212.304	0.962391	0.754906	1.27485	0.202363	0.333228
WBGene00020659		1.92853	1.03443	3.75492	1.04947	0	0	1.99262	2.10227		1.48278	0.961657	1.36797	0.702984	0.482066	NA
WBGene00018949		0	1.03443	4.69365	0	0.944571	0	0.996312	1.05114		1.09001	0.960953	1.70962	0.562087	0.574057	NA
WBGene00003432		44.3563	29.9984	37.5492	36.7313	13.224	12.4106	23.9115	27.3296		28.1889	0.960515	0.346475	2.77225	0.0055671	0.0217416
WBGene00007656		0.964267	0	4.69365	0	0.944571	0.954664	0	1.05114		1.07604	0.960206	1.71165	0.560984	0.574808	NA
WBGene00045289		20.2496	25.8607	16.8972	27.2861	12.2794	8.59198	14.9447	10.5114		17.0776	0.959074	0.398355	2.40759	0.0160584	0.0496915
WBGene00219489		0.964267	0	2.81619	0	0	0.954664	0	1.05114		0.723282	0.958594	2.04852	0.467944	0.639825	NA
WBGene00043062		34.7136	33.1017	46.9365	59.8196	25.5034	17.184	20.9226	26.2784		33.0575	0.958179	0.318957	3.0041	0.0026637	0.0121931
WBGene00017890		6.74987	5.17214	4.69365	6.2968	2.83371	4.77332	0.996312	3.15341		4.33365	0.957759	0.753018	1.27189	0.203411	0.33426
WBGene00007734		11.5712	16.5508	13.1422	10.4947	3.77828	7.63731	8.96681	6.30682		9.80602	0.957754	0.512014	1.87056	0.0614058	0.13715
WBGene00006053		35.6779	18.6197	34.733	14.6925	13.224	4.77332	16.9373	18.9205		19.6973	0.956098	0.46906	2.03833	0.0415173	0.102707
WBGene00021183		6.74987	5.17214	10.326	4.19787	3.77828	5.72798	0.996312	3.15341		5.01274	0.954023	0.734887	1.29819	0.194222	0.323301
WBGene00008615		6.74987	1.03443	9.38731	3.1484	7.55657	2.86399	0	0		3.84257	0.953572	1.09553	0.870422	0.38407	NA
WBGene00018844		0	1.03443	3.75492	1.04947	0	0	0.996312	2.10227		1.11718	0.953068	1.66096	0.573804	0.5661	NA
WBGene00016870		3.85707	7.24099	4.69365	3.1484	1.88914	2.86399	4.98156	0		3.58435	0.950759	0.883314	1.07636	0.281769	NA
WBGene00018400		585.31	246.194	505.976	145.876	251.256	256.805	135.498	124.034		281.369	0.950411	0.513342	1.85142	0.0641095	0.141623
WBGene00010958		2.8928	0	4.69365	0	0	0.954664	1.99262	1.05114		1.44811	0.950309	1.5289	0.621562	0.53423	NA
WBGene00020533		0.964267	0	5.63238	1.04947	0	0.954664	0.996312	2.10227		1.46242	0.94988	1.45632	0.652246	0.514243	NA
WBGene00014732		14.464	18.6197	23.4683	4.19787	7.55657	6.68265	7.9705	9.46023		11.5525	0.948045	0.546131	1.73593	0.0825763	0.172276
WBGene00003067		474.419	588.589	470.304	607.641	236.143	200.479	296.901	377.358		406.479	0.947456	0.199232	4.75555	1.97907e-06	2.94756e-05
WBGene00016399		3.85707	6.20657	9.38731	7.34627	1.88914	2.86399	2.98894	6.30682		5.10576	0.946375	0.715446	1.32278	0.18591	0.312945
WBGene00013165		5.7856	5.17214	9.38731	4.19787	3.77828	3.81866	0.996312	4.20455		4.66759	0.94585	0.740639	1.27707	0.201576	0.332448
WBGene00194681		24.1067	24.8263	30.9781	33.5829	19.836	16.2293	6.97418	15.7671		21.5376	0.945112	0.378711	2.4956	0.0125745	0.0411596
WBGene00016492		116.676	91.0296	91.0569	70.3143	43.4503	50.5972	56.7898	40.9943		70.1136	0.945105	0.234361	4.03268	5.51445e-05	0.00050349
WBGene00011554		23.1424	24.8263	28.1619	38.8303	16.0577	5.72798	12.9521	25.2273		21.8657	0.944826	0.424383	2.22635	0.0259905	0.0716959
WBGene00021081		9.64267	6.20657	35.6718	8.39574	9.44571	6.68265	11.9557	3.15341		11.3943	0.943001	0.653188	1.44369	0.148826	0.265821
WBGene00007060		26.9995	23.7918	31.9168	32.5335	18.8914	10.5013	17.9336	12.6136		21.8977	0.941894	0.355446	2.64989	0.0080517	0.029148
WBGene00011129		15.4283	13.4476	9.38731	12.5936	10.3903	6.68265	3.98525	5.25568		9.64633	0.941734	0.522906	1.80096	0.0717089	0.154598
WBGene00015439		0.964267	2.06886	0.938731	9.4452	2.83371	0.954664	0	3.15341		2.54486	0.941518	1.17512	0.801213	0.423009	NA
WBGene00045399		647.988	773.752	714.374	1063.11	338.156	350.362	456.311	521.364		608.177	0.94151	0.195623	4.81288	1.48769e-06	2.30618e-05
WBGene00255420		3.85707	6.20657	4.69365	2.09893	3.77828	0.954664	3.98525	0		3.1968	0.941129	0.947357	0.993426	0.320502	NA
WBGene00022726		3.85707	7.24099	4.69365	3.1484	3.77828	0.954664	1.99262	3.15341		3.60239	0.940232	0.830947	1.13152	0.257837	NA
WBGene00044169		2.8928	2.06886	7.50984	8.39574	1.88914	1.90933	3.98525	3.15341		3.97555	0.938927	0.825262	1.13773	0.255233	0.393614
WBGene00015419		3.85707	2.06886	5.63238	5.24734	0.944571	5.72798	0.996312	1.05114		3.19071	0.937936	0.940682	0.997081	0.318725	NA
WBGene00020362		15.4283	10.3443	15.9584	12.5936	7.55657	9.54664	6.97418	4.20455		10.3258	0.937824	0.496577	1.88858	0.0589487	0.133136
WBGene00077563		1.92853	0	1.87746	0	0	0	0	2.10227		0.738534	0.937522	2.22356	0.421631	0.673294	NA
WBGene00011203		41.4635	53.7902	45.0591	29.3851	17.9468	17.184	34.8709	18.9205		32.3275	0.934676	0.339227	2.75532	0.00586354	0.0226477
WBGene00010659		519.74	663.068	536.954	732.528	337.212	342.724	280.96	321.648		466.854	0.934158	0.151992	6.1461	7.94129e-10	3.03839e-08
WBGene00007308		88.7126	33.1017	66.6499	25.1872	25.5034	18.1386	31.882	36.7898		40.7456	0.934027	0.405934	2.30094	0.0213953	0.0616148
WBGene00008534		63.6416	86.8919	64.7724	55.6218	36.8383	33.4132	38.8562	32.5852		51.5776	0.933932	0.247602	3.77191	0.000162	0.00123902
WBGene00013180		215.032	239.987	201.827	211.992	141.686	141.29	78.7087	92.5001		165.378	0.933116	0.208584	4.47358	7.69216e-06	9.44719e-05
WBGene00010586		3.85707	5.17214	3.75492	4.19787	0.944571	2.86399	2.98894	2.10227		3.23522	0.932769	0.849406	1.09814	0.272143	NA
WBGene00010183		37.6064	58.9624	54.4464	56.6712	22.6697	25.7759	25.9041	34.6875		39.5905	0.931949	0.282055	3.30413	0.000952703	0.00525812
WBGene00012955		0	3.10328	0.938731	5.24734	3.77828	0	0.996312	0		1.75799	0.931779	1.47241	0.632827	0.526847	NA
WBGene00007209		4.82134	0	4.69365	0	0	0.954664	0.996312	3.15341		1.82742	0.93135	1.45559	0.639846	0.522273	NA
WBGene00011612		46.2848	48.6181	58.2013	61.9186	26.448	21.0026	29.8894	35.7387		41.0127	0.931258	0.273358	3.40673	0.000657459	0.00387969
WBGene00005611		3.85707	6.20657	4.69365	2.09893	1.88914	1.90933	3.98525	1.05114		3.21138	0.930908	0.879086	1.05895	0.289623	NA
WBGene00021117		5.7856	9.30985	9.38731	7.34627	4.72285	4.77332	3.98525	3.15341		6.05798	0.930827	0.625403	1.48836	0.136655	0.249363
WBGene00000988		651.845	730.306	592.339	825.931	316.431	264.442	360.665	528.722		533.835	0.930294	0.207125	4.49146	7.07371e-06	8.77945e-05
WBGene00021664		203.46	183.094	178.359	213.042	103.903	86.8744	115.572	101.96		148.283	0.9302	0.163532	5.68818	1.28401e-08	3.69159e-07
WBGene00008180		0	6.20657	8.44858	2.09893	3.77828	1.90933	0.996312	2.10227		3.19253	0.929482	1.03157	0.901039	0.367568	NA
WBGene00045401		22.1781	18.6197	29.1006	15.742	17.0023	7.63731	12.9521	7.35796		16.3238	0.929233	0.434197	2.14012	0.0323452	0.0845516
WBGene00011478		7.71414	4.13771	2.81619	4.19787	2.83371	0	3.98525	3.15341		3.60479	0.929144	0.880337	1.05544	0.291224	NA
WBGene00005188		25.0709	21.723	25.3457	25.1872	10.3903	18.1386	8.96681	13.6648		18.5609	0.927758	0.379281	2.4461	0.0144412	0.0458145
WBGene00044658		8.6784	5.17214	6.57111	11.5441	1.88914	6.68265	2.98894	5.25568		6.09778	0.927617	0.663872	1.39728	0.162328	0.283309
WBGene00044359		1.92853	4.13771	5.63238	3.1484	1.88914	3.81866	0.996312	1.05114		2.82528	0.927312	0.941123	0.985325	0.324464	NA
WBGene00009104		4.82134	4.13771	2.81619	11.5441	0.944571	0.954664	0	10.5114		4.46625	0.926202	1.01963	0.90837	0.363683	0.506744
WBGene00012087		22.1781	14.482	21.5908	11.5441	6.612	2.86399	13.9484	13.6648		13.3605	0.925883	0.518077	1.78715	0.0739131	0.158334
WBGene00194705		20.2496	17.5853	15.9584	11.5441	7.55657	8.59198	10.9594	7.35796		12.4754	0.924982	0.4514	2.04914	0.0404484	0.100584
WBGene00012324		233.353	316.535	246.886	395.649	142.63	120.288	137.491	228.097		227.616	0.92468	0.236519	3.90954	9.24732e-05	0.000772728
WBGene00022590		382.814	455.148	392.389	414.54	208.75	184.25	229.152	244.915		313.995	0.92459	0.139743	6.61636	3.68153e-11	1.91164e-09
WBGene00005989		4.82134	8.27542	9.38731	7.34627	3.77828	3.81866	5.97787	2.10227		5.68843	0.92407	0.661066	1.39785	0.162159	0.283087
WBGene00007218		3.85707	16.5508	4.69365	3.1484	2.83371	2.86399	4.98156	4.20455		5.39172	0.923313	0.767913	1.20237	0.229222	0.364776
WBGene00005631		5.7856	4.13771	0.938731	2.09893	2.83371	0.954664	2.98894	0		2.46729	0.922751	1.08	0.854395	0.392886	NA
WBGene00015925		7.71414	10.3443	15.9584	7.34627	0.944571	7.63731	3.98525	9.46023		7.92381	0.922462	0.648225	1.42306	0.154719	0.273253
WBGene00021799		64.6059	103.443	73.221	89.2047	42.5057	59.1892	41.8451	30.483		63.0622	0.919848	0.262823	3.49987	0.000465479	0.00295327
WBGene00194861		99.3195	104.477	107.954	136.431	77.4548	51.5519	53.8009	53.608		85.5746	0.919653	0.217116	4.23578	2.27764e-05	0.000237179
WBGene00045311		1.92853	1.03443	3.75492	6.2968	2.83371	0.954664	1.99262	1.05114		2.48085	0.919566	1.02361	0.898355	0.368996	NA
WBGene00219656		3.85707	4.13771	3.75492	3.1484	3.77828	0.954664	0	3.15341		2.84806	0.919331	0.962981	0.954671	0.339744	NA
WBGene00011699		134.997	57.928	114.525	7.34627	41.5611	60.1438	43.8377	21.0227		60.1703	0.91851	0.78293	1.17317	0.240728	0.377827
WBGene00022870		27.9637	27.9295	45.9978	24.1377	16.0577	21.9573	11.9557	16.8182		24.1022	0.918407	0.364163	2.52197	0.01167	0.0389239
WBGene00017941		1.92853	7.24099	3.75492	11.5441	1.88914	2.86399	4.98156	3.15341		4.66959	0.918111	0.79285	1.15799	0.246869	0.384536
WBGene00194800		5.7856	6.20657	5.63238	8.39574	4.72285	2.86399	3.98525	2.10227		4.96183	0.917962	0.691425	1.32764	0.184298	0.311021
WBGene00007125		10.6069	10.3443	8.44858	9.4452	7.55657	4.77332	5.97787	2.10227		7.40688	0.917608	0.583045	1.57382	0.115529	0.220928
WBGene00010095		3.85707	1.03443	3.75492	4.19787	2.83371	1.90933	1.99262	0		2.44749	0.917328	1.03049	0.890189	0.373364	NA
WBGene00010934		1.92853	4.13771	2.81619	4.19787	1.88914	1.90933	0.996312	2.10227		2.49717	0.91694	0.960885	0.954266	0.339949	NA
WBGene00008590		14.464	5.17214	11.2648	4.19787	5.66743	2.86399	5.97787	4.20455		6.72658	0.916264	0.656031	1.39668	0.162511	0.283498
WBGene00206531		7.71414	9.30985	9.38731	1.04947	5.66743	5.72798	0.996312	2.10227		5.24434	0.916224	0.804598	1.13874	0.254813	0.393166
WBGene00044707		4.82134	10.3443	8.44858	4.19787	4.72285	2.86399	3.98525	3.15341		5.3172	0.915581	0.687653	1.33146	0.183038	0.309408
WBGene00021877		361.6	426.184	395.206	412.441	205.916	193.797	212.214	234.404		305.22	0.915236	0.129651	7.05922	1.67442e-12	1.15143e-10
WBGene00000657		250.709	198.61	216.847	343.176	134.129	41.0505	164.391	196.563		193.184	0.913742	0.349192	2.61673	0.00887765	0.0314115
WBGene00010274		93.5339	102.408	81.6696	261.317	57.6188	51.5519	47.823	129.29		103.152	0.91346	0.400272	2.2821	0.0224836	0.0641201
WBGene00017334		4.82134	4.13771	3.75492	0	1.88914	3.81866	0.996312	0		2.42726	0.913005	1.15072	0.793423	0.427531	NA
WBGene00009681		43.392	13.4476	45.0591	16.7915	12.2794	12.4106	22.9152	15.7671		22.7578	0.912976	0.463557	1.9695	0.0488954	0.115601
WBGene00008068		8.6784	20.6886	18.7746	48.2755	5.66743	8.59198	12.9521	24.1762		18.4756	0.91152	0.567443	1.60636	0.108194	0.210249
WBGene00015869		3.85707	4.13771	5.63238	3.1484	0.944571	1.90933	1.99262	4.20455		3.22833	0.910739	0.866016	1.05164	0.292964	NA
WBGene00015320		24.1067	18.6197	15.0197	17.8409	12.2794	10.5013	10.9594	6.30682		14.4542	0.9104	0.425933	2.13743	0.0325633	0.0849549
WBGene00010961		466.705	699.273	509.731	1045.27	346.658	399.05	297.897	403.637		521.027	0.910359	0.236959	3.84184	0.000122113	0.000972954
WBGene00020311		703.915	567.901	554.79	496.398	246.533	253.941	342.731	394.176		445.048	0.910095	0.184729	4.92665	8.36518e-07	1.42685e-05
WBGene00008519		151.39	73.4444	86.3632	55.6218	68.9537	48.6879	43.8377	33.6364		70.2419	0.909963	0.330022	2.75728	0.00582848	0.022526
WBGene00016414		2.8928	4.13771	3.75492	2.09893	2.83371	0.954664	1.99262	1.05114		2.46456	0.909904	0.972696	0.935446	0.349559	NA
WBGene00021045		1.92853	5.17214	9.38731	9.4452	2.83371	3.81866	3.98525	3.15341		4.96553	0.909589	0.740615	1.22815	0.219389	0.353104
WBGene00008301		87.7483	45.5148	168.033	27.2861	66.12	56.3252	39.8525	12.6136		62.9367	0.909374	0.704008	1.29171	0.196458	0.326063
WBGene00219374		261.316	339.292	213.092	325.335	144.519	136.517	156.421	169.233		218.216	0.908364	0.182544	4.97614	6.48639e-07	1.14874e-05
WBGene00015802		941.125	927.882	717.19	1507.03	568.632	407.641	489.189	715.824		784.315	0.908098	0.232658	3.90315	9.49498e-05	0.000788631
WBGene00014643		131.14	101.374	122.974	101.798	50.0623	61.0985	58.7824	74.6307		87.7325	0.907277	0.206259	4.39874	1.08883e-05	0.000127477
WBGene00019642		2.8928	2.06886	3.75492	4.19787	1.88914	0.954664	2.98894	1.05114		2.47479	0.906901	0.973239	0.931838	0.35142	NA
WBGene00019718		31.8208	11.3787	13.1422	11.5441	12.2794	7.63731	8.96681	7.35796		13.0159	0.906462	0.509363	1.7796	0.0751413	0.160323
WBGene00219493		23.1424	16.5508	14.081	12.5936	9.44571	8.59198	7.9705	9.46023		12.7295	0.906349	0.448741	2.01976	0.0434083	0.106099
WBGene00014472		365.457	425.15	548.219	376.759	282.427	296.9	207.233	128.239		328.798	0.906124	0.243334	3.72379	0.000196255	0.00145157
WBGene00008567		150.426	217.23	168.033	359.967	97.2908	81.1464	106.605	193.409		171.763	0.905368	0.314272	2.88084	0.00396618	0.0167259
WBGene00000735		6.74987	8.27542	12.2035	11.5441	7.55657	2.86399	2.98894	7.35796		7.44255	0.903852	0.602283	1.50071	0.133431	0.245511
WBGene00001692		1099.26	1255.8	1005.38	1830.27	740.544	502.153	673.507	862.983		996.237	0.901275	0.213059	4.23017	2.33515e-05	0.000242631
WBGene00017819		3.85707	2.06886	1.87746	3.1484	3.77828	0	0.996312	1.05114		2.09719	0.900042	1.12212	0.802091	0.4225	NA
WBGene00009649		20.2496	35.1705	33.7943	41.9787	10.3903	21.9573	14.9447	23.125		25.2013	0.899031	0.374322	2.40176	0.0163164	0.0502684
WBGene00013510		36.6422	38.2738	36.6105	35.6819	17.9468	20.0479	16.9373	24.1762		28.2896	0.898902	0.300143	2.99491	0.00274524	0.0124915
WBGene00018267		19.2853	13.4476	19.7133	4.19787	3.77828	11.456	8.96681	6.30682		10.894	0.8986	0.577632	1.55566	0.119788	0.226463
WBGene00219216		161.033	99.3051	171.788	97.6004	77.4548	80.1918	65.7566	60.9659		101.762	0.898402	0.242406	3.70618	0.000210407	0.00154121
WBGene00018946		19.2853	39.3083	15.9584	27.2861	7.55657	13.3653	17.9336	15.7671		19.5576	0.898377	0.42853	2.09641	0.0360455	0.0919569
WBGene00010617		178.389	192.404	220.602	173.162	101.069	86.8744	114.576	108.267		146.918	0.898307	0.168904	5.31845	1.04655e-07	2.3669e-06
WBGene00020364		28.928	16.5508	29.1006	17.8409	16.0577	20.0479	5.97787	7.35796		17.7327	0.898072	0.459897	1.95277	0.0508472	0.119091
WBGene00003452		39.535	18.6197	41.3041	18.8904	7.55657	12.4106	20.9226	23.125		22.7955	0.897964	0.444475	2.02028	0.0433541	0.106031
WBGene00206482		32.7851	37.2394	36.6105	29.3851	16.0577	19.0933	14.9447	23.125		26.1551	0.8977	0.317998	2.82298	0.00475803	0.0192805
WBGene00003429		38.5707	21.723	42.2429	30.4345	12.2794	12.4106	19.9262	27.3296		25.6146	0.897216	0.377663	2.3757	0.0175156	0.0530015
WBGene00011609		9.64267	6.20657	13.1422	9.4452	6.612	2.86399	4.98156	6.30682		7.40013	0.895969	0.587473	1.52512	0.127228	0.236775
WBGene00010693		5.7856	4.13771	10.326	14.6925	2.83371	4.77332	6.97418	4.20455		6.71596	0.89593	0.654952	1.36793	0.171333	0.293866
WBGene00011176		31.8208	18.6197	31.9168	28.3356	10.3903	8.59198	19.9262	21.0227		21.328	0.895546	0.39879	2.24566	0.0247259	0.0690318
WBGene00013527		7.71414	7.24099	14.081	16.7915	9.44571	2.86399	4.98156	7.35796		8.8096	0.89462	0.581121	1.53947	0.123689	0.232026
WBGene00016765		3.85707	2.06886	0	3.1484	3.77828	0	0	1.05114		1.73797	0.8946	1.4255	0.627567	0.530287	NA
WBGene00019105		338.458	418.943	409.287	396.699	237.087	222.437	192.288	189.205		300.55	0.892994	0.141831	6.29618	3.0507e-10	1.29067e-08
WBGene00195177		3.85707	8.27542	10.326	1.04947	0.944571	6.68265	3.98525	1.05114		4.52145	0.891641	0.892972	0.998508	0.318033	0.460504
WBGene00011362		41.4635	42.4115	73.221	55.6218	29.2817	34.3679	29.8894	21.0227		40.9099	0.891371	0.297651	2.99468	0.00274731	0.0124954
WBGene00194746		6.74987	1.03443	1.87746	10.4947	3.77828	1.90933	1.99262	3.15341		3.87376	0.8903	0.896133	0.993491	0.320471	NA
WBGene00020435		2.8928	4.13771	2.81619	1.04947	3.77828	0	0	2.10227		2.09709	0.888782	1.19831	0.741695	0.458272	NA
WBGene00011046		0.964267	3.10328	0	3.1484	1.88914	1.90933	0	0		1.3768	0.888582	1.50732	0.589511	0.555518	NA
WBGene00013007		7.71414	95.1674	29.1006	570.91	78.3994	12.4106	93.6533	195.511		135.358	0.887405	1.25848	0.705143	0.480721	0.617371
WBGene00006172		5.7856	1.03443	0.938731	3.1484	0.944571	1.90933	1.99262	1.05114		2.1006	0.887149	1.10655	0.801722	0.422714	NA
WBGene00003711		269.031	250.332	301.333	272.861	162.466	159.429	158.414	110.369		210.529	0.887076	0.16366	5.42025	5.95162e-08	1.43308e-06
WBGene00017168		2.8928	6.20657	2.81619	8.39574	2.83371	0.954664	2.98894	4.20455		3.91164	0.886498	0.824385	1.07534	0.282221	0.423428
WBGene00007688		6.74987	0	1.87746	4.19787	0.944571	1.90933	0.996312	3.15341		2.4786	0.88637	1.10596	0.801452	0.42287	NA
WBGene00001899		5.7856	2.06886	2.81619	0	0.944571	3.81866	0.996312	0		2.05377	0.884217	1.26271	0.700252	0.48377	NA
WBGene00020914		7.71414	13.4476	7.50984	2.09893	2.83371	5.72798	5.97787	2.10227		5.92654	0.883661	0.719931	1.22742	0.219663	0.353345
WBGene00000608		9462.35	11318.7	9488.69	14708.3	4926.88	4114.6	7227.25	8110.57		8669.67	0.883595	0.221022	3.99777	6.39433e-05	0.000572527
WBGene00007391		706.808	864.782	737.842	722.033	376.884	366.591	443.359	458.296		584.574	0.882395	0.131064	6.73256	1.66708e-11	9.35648e-10
WBGene00220225		29.8923	29.9984	27.2232	46.1766	17.9468	11.456	21.9189	21.0227		25.7044	0.882238	0.349147	2.52684	0.0115094	0.0385397
WBGene00009048		577.596	638.242	443.081	882.602	265.424	336.996	294.908	482.472		490.165	0.881464	0.233222	3.77951	0.000157136	0.00120605
WBGene00010019		208.282	85.8575	159.584	29.3851	76.5102	84.0104	60.775	40.9943		93.1748	0.881356	0.589983	1.49387	0.135211	0.247556
WBGene00016164		15.4283	10.3443	4.69365	0	6.612	0.954664	8.96681	0		5.87496	0.880027	1.05045	0.837764	0.402163	0.544182
WBGene00020674		9.64267	36.205	19.7133	68.2154	14.1686	15.2746	17.9336	25.2273		25.7976	0.879917	0.512578	1.71665	0.0860432	0.177601
WBGene00013986		408.849	484.112	410.225	1215.28	323.988	237.711	323.801	483.523		485.937	0.879392	0.446092	1.97133	0.0486867	0.115251
WBGene00194691		0.964267	4.13771	1.87746	2.09893	1.88914	0.954664	0.996312	1.05114		1.7462	0.878712	1.1546	0.761055	0.446624	NA
WBGene00012637		8.6784	4.13771	11.2648	3.1484	0.944571	4.77332	2.98894	6.30682		5.28037	0.878561	0.759387	1.15693	0.247299	0.385114
WBGene00017406		10.6069	3.10328	6.57111	5.24734	1.88914	1.90933	3.98525	6.30682		4.9524	0.878209	0.749684	1.17144	0.241422	0.378658
WBGene00008317		848.555	942.364	895.549	969.708	486.454	481.151	537.012	484.574		705.671	0.877921	0.105198	8.34542	7.09628e-17	9.42015e-15
WBGene00019515		177.425	172.749	163.339	240.328	78.3994	95.4664	83.6902	153.466		145.608	0.876909	0.236643	3.70563	0.00021087	0.00154125
WBGene00016451		3.85707	6.20657	4.69365	7.34627	0	2.86399	2.98894	6.30682		4.28291	0.876123	0.826986	1.05942	0.28941	0.430995
WBGene00022113		498.526	529.627	584.829	503.744	306.986	251.077	310.849	284.858		408.812	0.875896	0.127471	6.87134	6.36001e-12	3.89512e-10
WBGene00012780		67.4987	83.7886	102.322	66.1164	37.7828	46.7785	42.8414	47.3012		61.8037	0.874786	0.238503	3.66783	0.000244621	0.00175488
WBGene00008507		8.6784	9.30985	13.1422	1.04947	3.77828	5.72798	5.97787	2.10227		6.2208	0.874482	0.733553	1.19212	0.233215	0.36982
WBGene00050956		0	4.13771	3.75492	1.04947	0.944571	1.90933	1.99262	0		1.72358	0.873489	1.31332	0.665101	0.505986	NA
WBGene00014028		301.816	311.363	300.394	317.989	153.02	146.064	199.262	174.489		238.049	0.873124	0.144817	6.02917	1.64805e-09	5.83739e-08
WBGene00021214		6.74987	3.10328	4.69365	5.24734	4.72285	0.954664	1.99262	3.15341		3.82721	0.872894	0.810197	1.07739	0.281308	NA
WBGene00219295		6.74987	7.24099	7.50984	7.34627	3.77828	5.72798	0.996312	5.25568		5.57566	0.872333	0.673115	1.29596	0.194988	0.324223
WBGene00008577		53.0347	66.2034	67.5886	146.925	57.6188	65.8718	29.8894	28.3807		64.4391	0.871873	0.373817	2.33236	0.019682	0.0577929
WBGene00013036		14.464	11.3787	15.0197	9.4452	3.77828	10.5013	6.97418	6.30682		9.73353	0.871789	0.519773	1.67725	0.093494	0.188744
WBGene00219770		35.6779	25.8607	46.9365	40.9292	21.7251	19.0933	17.9336	23.125		28.9102	0.870994	0.318239	2.73692	0.00620169	0.0236865
WBGene00012639		10.6069	10.3443	12.2035	11.5441	6.612	9.54664	4.98156	3.15341		8.62406	0.870289	0.541437	1.60737	0.107974	0.210005
WBGene00009238		10.6069	7.24099	7.50984	12.5936	5.66743	1.90933	7.9705	5.25568		7.34429	0.869294	0.604039	1.43914	0.150112	0.267492
WBGene00009149		1.92853	2.06886	3.75492	3.1484	0	0.954664	2.98894	2.10227		2.11832	0.868831	1.09304	0.794879	0.426684	NA
WBGene00206484		2.8928	0	1.87746	4.19787	1.88914	0.954664	0.996312	1.05114		1.73242	0.868653	1.21766	0.713381	0.47561	NA
WBGene00022142		30.8565	37.2394	36.6105	40.9292	21.7251	21.9573	15.941	19.9716		28.1538	0.868468	0.304332	2.85369	0.00432151	0.0178303
WBGene00010085		1421.33	1460.61	1502.91	1496.54	831.222	729.363	875.758	788.353		1138.26	0.867034	0.0999607	8.67375	4.18134e-18	6.32003e-16
WBGene00014105		5.7856	6.20657	9.38731	7.34627	1.88914	5.72798	3.98525	4.20455		5.56658	0.866203	0.663249	1.306	0.191553	0.320188
WBGene00008707		5125.08	4643.55	3758.68	6676.71	2799.71	1979.97	2799.64	3508.7		3911.5	0.865675	0.202456	4.27587	1.90389e-05	0.000205115
WBGene00001438		54.9632	40.3427	50.6915	37.7808	16.0577	21.0026	34.8709	29.4318		35.6427	0.865667	0.313914	2.75766	0.00582169	0.0225168
WBGene00194925		2.8928	7.24099	9.38731	18.8904	5.66743	0	4.98156	10.5114		7.44648	0.865492	0.79357	1.09063	0.275436	0.416317
WBGene00044107		155.247	172.749	113.586	334.78	94.4571	62.0532	80.7013	189.205		150.347	0.865226	0.364254	2.37534	0.0175329	0.0530329
WBGene00016658		350.993	269.986	296.639	343.176	119.961	75.4184	183.321	314.29		244.223	0.865126	0.326293	2.65138	0.00801641	0.0290616
WBGene00022871		2.8928	3.10328	0.938731	2.09893	0	2.86399	0	2.10227		1.75	0.864798	1.26641	0.682874	0.494687	NA
WBGene00020247		153.318	196.541	141.748	246.625	83.1222	99.285	112.583	110.369		142.949	0.864206	0.214661	4.02591	5.67562e-05	0.000517199
WBGene00018910		9.64267	12.4131	14.081	13.6431	9.44571	7.63731	7.9705	2.10227		9.61695	0.863002	0.532436	1.62086	0.105049	0.20581
WBGene00017839		4.82134	0	11.2648	0	0.944571	0	7.9705	0		3.12515	0.860812	1.54882	0.555787	0.578356	NA
WBGene00009805		137.89	81.7198	189.624	23.0883	78.3994	81.1464	62.7677	15.7671		83.8003	0.860488	0.726928	1.18373	0.236519	0.373431
WBGene00017090		0.964267	2.06886	3.75492	2.09893	1.88914	0.954664	0.996312	1.05114		1.72228	0.860162	1.1536	0.745636	0.455887	NA
WBGene00019972		32.7851	22.7574	29.1006	29.3851	17.0023	14.32	20.9226	10.5114		22.098	0.859887	0.353612	2.43172	0.0150272	0.0472569
WBGene00008724		6.74987	1.03443	6.57111	5.24734	1.88914	2.86399	2.98894	3.15341		3.81228	0.858735	0.826175	1.03941	0.298614	NA
WBGene00004001		8.6784	8.27542	5.63238	2.09893	5.66743	3.81866	2.98894	1.05114		4.77641	0.858409	0.767938	1.11781	0.263648	0.403616
WBGene00044238		11.5712	11.3787	17.8359	5.24734	4.72285	10.5013	4.98156	5.25568		8.93682	0.857359	0.577333	1.48503	0.137535	0.25064
WBGene00021288		8.6784	7.24099	9.38731	5.24734	2.83371	2.86399	2.98894	8.4091		5.95622	0.857121	0.665557	1.28782	0.197807	0.327697
WBGene00015044		1022.12	506.87	1438.14	80.809	503.456	501.199	512.104	166.08		591.347	0.856955	0.801578	1.06908	0.285031	0.426555
WBGene00013481		3186.9	3257.41	3393.51	3695.17	1933.54	2000.98	1737.57	1802.7		2625.97	0.856186	0.0994937	8.60543	7.60297e-18	1.1054e-15
WBGene00011190		441.634	560.66	367.044	709.44	253.145	319.812	288.931	285.909		403.322	0.856094	0.200456	4.27073	1.94832e-05	0.000208577
WBGene00019165		0.964267	3.10328	9.38731	4.19787	1.88914	3.81866	2.98894	1.05114		3.42507	0.855969	0.921537	0.928849	0.352967	NA
WBGene00007791		32.7851	33.1017	37.5492	11.5441	23.6143	12.4106	15.941	11.5625		22.3136	0.855938	0.427827	2.00066	0.0454288	0.109526
WBGene00010483		105.105	101.374	116.403	133.282	67.0645	63.0078	60.775	60.9659		88.4972	0.855833	0.190767	4.48627	7.24803e-06	8.95363e-05
WBGene00023259		0	2.06886	1.87746	3.1484	0.944571	1.90933	0.996312	0		1.36812	0.855831	1.39141	0.61508	0.538502	NA
WBGene00015230		2.8928	1.03443	2.81619	2.09893	0.944571	1.90933	0.996312	1.05114		1.71796	0.854688	1.14405	0.747071	0.455021	NA
WBGene00195189		57.856	54.8247	67.5886	93.4026	33.06	30.5492	44.834	43.0966		53.1515	0.854126	0.268232	3.18428	0.00145113	0.00743137
WBGene00044279		6.74987	4.13771	13.1422	14.6925	5.66743	8.59198	5.97787	1.05114		7.50134	0.853407	0.669821	1.27408	0.202634	0.33345
WBGene00016351		10.6069	10.3443	15.9584	8.39574	2.83371	1.90933	5.97787	14.7159		8.84278	0.853364	0.642349	1.3285	0.184012	0.31064
WBGene00021169		1.92853	2.06886	5.63238	1.04947	0	0.954664	3.98525	1.05114		2.08379	0.853208	1.1802	0.722936	0.469719	NA
WBGene00014760		1.92853	4.13771	4.69365	5.24734	2.83371	0.954664	3.98525	1.05114		3.104	0.852419	0.900485	0.946622	0.343831	NA
WBGene00007808		165.854	163.44	200.888	188.904	107.681	96.4211	103.616	90.3978		139.65	0.852388	0.16337	5.21753	1.81329e-07	3.81816e-06
WBGene00012623		59.7846	84.8231	91.0569	81.8584	47.2285	35.3226	34.8709	58.8637		61.7261	0.851416	0.254174	3.34974	0.000808881	0.00461794
WBGene00003438		24.1067	14.482	34.733	15.742	7.55657	7.63731	22.9152	11.5625		17.3419	0.851338	0.484002	1.75896	0.0785847	0.16577
WBGene00019858		44.3563	43.446	54.4464	25.1872	22.6697	15.2746	25.9041	29.4318		32.5895	0.851283	0.335966	2.53384	0.011282	0.0379448
WBGene00021971		14.464	18.6197	12.2035	22.0388	7.55657	14.32	10.9594	4.20455		13.0458	0.850941	0.4801	1.77242	0.0763242	0.161873
WBGene00206384		1.92853	2.06886	4.69365	2.09893	0.944571	0.954664	0	4.20455		2.11172	0.850826	1.13966	0.74656	0.455329	NA
WBGene00009470		9.64267	2.06886	7.50984	7.34627	2.83371	4.77332	2.98894	4.20455		5.17102	0.850647	0.714875	1.18993	0.234076	0.370499
WBGene00003552		31.8208	37.2394	31.9168	24.1377	24.5588	19.0933	15.941	9.46023		24.271	0.850467	0.359568	2.36525	0.0180181	0.0542425
WBGene00013421		1.92853	3.10328	0	7.34627	2.83371	2.86399	0	1.05114		2.39087	0.849981	1.2049	0.705439	0.480537	NA
WBGene00195147		2.8928	2.06886	1.87746	2.09893	0	1.90933	0.996312	2.10227		1.74325	0.849645	1.16765	0.727653	0.466826	NA
WBGene00005643		324.958	151.026	242.192	135.381	143.575	119.333	120.554	90.3978		165.927	0.849356	0.274415	3.09515	0.00196714	0.00954559
WBGene00007733		16.3925	12.4131	18.7746	9.4452	6.612	1.90933	14.9447	8.4091		11.1126	0.84934	0.563512	1.50723	0.131753	0.243179
WBGene00004026		26.0352	23.7918	18.7746	31.484	14.1686	9.54664	10.9594	21.0227		19.4729	0.849119	0.390593	2.17392	0.0297109	0.0792597
WBGene00015178		3.85707	4.13771	4.69365	3.1484	2.83371	2.86399	1.99262	1.05114		3.07229	0.848905	0.862189	0.984593	0.324824	NA
WBGene00044177		8.6784	6.20657	7.50984	4.19787	2.83371	1.90933	6.97418	3.15341		5.18292	0.848105	0.706639	1.2002	0.230063	0.365821
WBGene00003529		0.964267	4.13771	9.38731	3.1484	1.88914	1.90933	4.98156	1.05114		3.43361	0.848081	0.937217	0.904893	0.365522	NA
WBGene00008460		18.3211	25.8607	22.5295	36.7313	14.1686	12.4106	11.9557	18.9205		20.1123	0.847733	0.382733	2.21494	0.026764	0.0733271
WBGene00010651		7.71414	7.24099	14.081	8.39574	2.83371	2.86399	7.9705	7.35796		7.30725	0.847577	0.616326	1.37521	0.169066	0.291141
WBGene00020531		1.92853	1.03443	3.75492	2.09893	1.88914	0	1.99262	1.05114		1.71872	0.847092	1.19678	0.707812	0.479062	NA
WBGene00015227		18.3211	15.5164	33.7943	16.7915	17.0023	7.63731	12.9521	9.46023		16.4344	0.845686	0.446055	1.89592	0.0579702	0.131458
WBGene00013764		5.7856	1.03443	7.50984	3.1484	0.944571	3.81866	4.98156	0		3.40288	0.845597	0.993135	0.851442	0.394524	NA
WBGene00009327		4.82134	1.03443	0.938731	2.09893	0	0.954664	2.98894	1.05114		1.73602	0.844927	1.25498	0.673257	0.500784	NA
[truncated: 21,470 more rows]
