# Supplementary material for: Visualizing formation of the active site in the mitochondrial ribosome
Source: eLife. 2021 Oct 5;10:e68806. doi: 10.7554/eLife.68806 (PMC8492066; doi:10.7554/eLife.68806)
Supplement: Supplementary file 2. [file elife-68806-supp2.xlsx]

## Sheet: Sheet1
	Fig. 3b
		N2	mter-4	mtg-1
	Sterile	0	25	100
	Fertile	100	152	0
	Fig. 3c	N2	mter-4
	L2	0	5
	L3	0	110
	L4	207	84
	YA	9	0
